# Supplementary material
Source: PubMed Central journal article supplement (PMC4886865)
Supplement: NIHMS761291-supplement-Supplemental_Information.pdf [file NIHMS761291-supplement-Supplemental_Information.pdf]

# Supporting Information

**A peptide resource for the analysis of *Staphylococcus aureus* in  
host–pathogen interaction studies**

c

Maren Depke, Stephan Michalik, Alexander Rabe, Kristin Surmann,  
Lars Brinkmann, Nico Jehmlich, Jörg Bernhardt, Michael Hecker,  
Bernd Wollscheid, Zhi Sun, Robert L. Moritz, Uwe Völker and Frank Schmidt

## Supplemental Material S1: Details of LC-MS/MS analysis and database search

| <b>strong cationic exchange chromatography (SCX)</b> |                                                                                                                                                                                                        |
|------------------------------------------------------|--------------------------------------------------------------------------------------------------------------------------------------------------------------------------------------------------------|
| instrument                                           | Ultimate 3000 RSLC (Dionex, Idstein, Germany)                                                                                                                                                          |
| SCX column                                           | nano column (Poros 10S, 300 µm x 10 cm, nanoViper, SCX, 10 µm)                                                                                                                                         |
| buffer system                                        | binary buffer system consisting of 5 mM Na <sub>2</sub> HPO <sub>4</sub> pH 3, 5% ACN in water (SCX buffer A) and 1 M NaCl, 5 mM Na <sub>2</sub> HPO <sub>4</sub> pH 3, 5% ACN in water (SCX buffer B) |
| flow rate                                            | loading: 5 µl/min<br>elution: 300 nl/min                                                                                                                                                               |
| method                                               | 2D salt steps; 7 different concentrations of NaCl                                                                                                                                                      |
| salt step volume                                     | 12 µl                                                                                                                                                                                                  |
| salt step concentrations                             | 2 mM, 10 mM, 20 mM, 50 mM, 100 mM, 200 mM, 500 mM                                                                                                                                                      |
| column oven temperature                              | 40°C                                                                                                                                                                                                   |

| <b>reversed phase liquid chromatography (RPLC)</b> |                                                                                                                                                                                                                                                                                                                                                                    |
|----------------------------------------------------|--------------------------------------------------------------------------------------------------------------------------------------------------------------------------------------------------------------------------------------------------------------------------------------------------------------------------------------------------------------------|
| instrument                                         | Ultimate 3000 RSLC (Dionex, Idstein, Germany)                                                                                                                                                                                                                                                                                                                      |
| trap column                                        | 75 µm inner diameter, packed with 3 µm C18 particles (Acclaim PepMap100, Thermo Scientific)                                                                                                                                                                                                                                                                        |
| analytical column                                  | <i>for SCX and off-gel pre-fractionated samples and non-fractionated samples (standard method):</i><br>15 cm analytical column packed with 2 µm C18 particles (Acclaim PepMap RSLC, Thermo Scientific)<br><i>for samples from cell culture infection model:</i><br>25 cm analytical column packed with 2 µm C18 particles (Acclaim PepMap RSLC, Thermo Scientific) |
| buffer system                                      | binary buffer system consisting of 0.1% acetic acid, 2% ACN (buffer A) and 0.1% acetic acid in 100% ACN in (buffer B)                                                                                                                                                                                                                                              |
| flow rate                                          | 300 nl/min                                                                                                                                                                                                                                                                                                                                                         |
| gradient                                           | linear gradient of buffer B from 2% up to 25%                                                                                                                                                                                                                                                                                                                      |
| gradient duration                                  | 30 min <i>for SCX pre-fractionated samples</i><br>30 min <i>for off-gel pre-fractionated samples</i><br>100 min <i>for non-fractionated samples (standard method)</i><br>120 min <i>for samples from cell culture infection model</i>                                                                                                                              |
| column oven temperature                            | 40°C                                                                                                                                                                                                                                                                                                                                                               |

## mass spectrometry (MS)

|                                                |                                                                                                                                                                                                                                                 |
|------------------------------------------------|-------------------------------------------------------------------------------------------------------------------------------------------------------------------------------------------------------------------------------------------------|
| instrument                                     | Q Exactive mass spectrometer (Thermo Scientific)                                                                                                                                                                                                |
| electrospray                                   | via TriVersa NanoMate (Advion Biosciences, Norwich, UK)                                                                                                                                                                                         |
| operation mode                                 | data-dependent                                                                                                                                                                                                                                  |
| MS scan resolution                             | 70,000                                                                                                                                                                                                                                          |
| MS ion target value                            | 3e6                                                                                                                                                                                                                                             |
| maximum ion injection time for the MS scan     | 250 ms <i>for SCX pre-fractionated, off-gel pre-fractionated, and non-fractionated samples (standard method)</i><br>120 ms <i>for samples from cell culture infection model</i>                                                                 |
| selection for MS/MS                            | 10 most abundant isotope patterns with charge $\geq 2$ from the survey scan                                                                                                                                                                     |
| isolation window                               | 3 <i>m/z</i>                                                                                                                                                                                                                                    |
| dissociation mode                              | higher energy collisional dissociation (HCD)                                                                                                                                                                                                    |
| normalized collision energy                    | 27.5%                                                                                                                                                                                                                                           |
| maximum ion injection time for the MS/MS scans | 120 ms                                                                                                                                                                                                                                          |
| MS/MS ion target value                         | 2e5                                                                                                                                                                                                                                             |
| dynamic exclusion                              | 40 s <i>for SCX pre-fractionated, off-gel pre-fractionated, and non-fractionated samples (standard method)</i><br>30 s <i>for samples from cell culture infection model</i>                                                                     |
| MS/MS operation mode                           | profile mode, peptide match: on<br><i>for SCX pre-fractionated, off-gel pre-fractionated, and non-fractionated samples (standard method)</i><br>centroid mode, peptide match: preferred<br><i>for samples from cell culture infection model</i> |

## database search and analysis

### SEARCH PARAMETERS AND ACCEPTANCE CRITERIA

|                                                                                                                                |                                                                                                                                                                                                                                                                                                                                                                                                                                                                                                                                                                                                                                                                                                                                                                                                                      |
|--------------------------------------------------------------------------------------------------------------------------------|----------------------------------------------------------------------------------------------------------------------------------------------------------------------------------------------------------------------------------------------------------------------------------------------------------------------------------------------------------------------------------------------------------------------------------------------------------------------------------------------------------------------------------------------------------------------------------------------------------------------------------------------------------------------------------------------------------------------------------------------------------------------------------------------------------------------|
| <i>search engine</i><br>name<br>version or release date                                                                        | MASCOT Server / MASCOT Daemon<br>version 2.3.2                                                                                                                                                                                                                                                                                                                                                                                                                                                                                                                                                                                                                                                                                                                                                                       |
| <i>sequence database</i><br>name<br>version<br>release date<br>number of entries                                               | Sau_8325_BLAST_HGW<br>S.Aureus_DB_NCTC8325_NC007795_BLAST_HGW_20130327.fasta<br>2013-03-27<br>2891 database without reversed entries                                                                                                                                                                                                                                                                                                                                                                                                                                                                                                                                                                                                                                                                                 |
| <i>spectral library</i><br>name<br>version<br>source of sequences<br>source of spectra<br>software used for library generation | 20130930_StaphMascot_noProb<br>2013-09-30<br>FASTA-file, see sequence database above<br>144 raw files of this study<br>Trans Proteomics Pipeline (TPP)                                                                                                                                                                                                                                                                                                                                                                                                                                                                                                                                                                                                                                                               |
| <i>enzyme specificity</i><br>enzyme<br>missed cleavages<br>non-specific cleavages                                              | trypsin<br>max. 2 allowed<br>none                                                                                                                                                                                                                                                                                                                                                                                                                                                                                                                                                                                                                                                                                                                                                                                    |
| <i>modifications</i><br>fixed modifications<br>variable modifications                                                          | none<br>deamidation<br>carbamidomethylation (C)<br>oxidation (M)<br>conversion of Gln to pyroGlu (N-term Q)                                                                                                                                                                                                                                                                                                                                                                                                                                                                                                                                                                                                                                                                                                          |
| <i>mass tolerance</i><br>for precursor ions<br>for fragment ions                                                               | 10 ppm<br>0.1 Da                                                                                                                                                                                                                                                                                                                                                                                                                                                                                                                                                                                                                                                                                                                                                                                                     |
| known contaminants excluded                                                                                                    | not excluded                                                                                                                                                                                                                                                                                                                                                                                                                                                                                                                                                                                                                                                                                                                                                                                                         |
| <i>threshold score</i><br>used for accepting individual spectra                                                                | <p>data from MASCOT search: ion score &gt; 20 used for all analyzed files</p> <p>For each file, an ion score &gt;20 is higher than the threshold score which indicates identity or extensive homology with <math>p &lt; 0.05</math>. Perkins, D. N., Pappin, D. J., Creasy, D. M., Cottrell, J. S., Probability-based protein identification by searching sequence databases using mass spectrometry data. Electrophoresis 1999, 20, 3551-3567.</p> <p>Individual ion scores at the threshold of <math>p &lt; 0.05</math> for the individual files are indicated below;<br/>minimum = 13; maximum = 18; mean = 16.5;<br/>median = 17; standard deviation = 0.97<br/>(calculated from all data sets).</p> <p>data from spectral library search: DOT score &gt; 0.5<br/>and absolute precursor tolerance &lt; 0.01</p> |



*threshold score*  
used for accepting individual spectra  
(continued)

| file               | ion score threshold<br>with $p < 0.05$ |
|--------------------|----------------------------------------|
| BR2_F1             | 17                                     |
| BR2_F2             | 17                                     |
| BR2_F3             | 18                                     |
| BR2_F4             | 17                                     |
| BR2_F5             | 17                                     |
| BR2_F6             | 17                                     |
| BR2_F7             | 16                                     |
| BR2_F8             | 16                                     |
| BR2_F9             | 17                                     |
| BR2_F10            | 17                                     |
| BR2_F11            | 17                                     |
| BR2_F12            | 17                                     |
| BR2_F13            | 16                                     |
| BR2_F14            | 16                                     |
| BR2_F15            | 16                                     |
| BR2_F16            | 16                                     |
| BR2_F17            | 16                                     |
| BR2_F18            | 15                                     |
| BR2_F19            | 15                                     |
| BR2_F20            | 16                                     |
| BR2_F21            | 16                                     |
| BR2_F22            | 16                                     |
| BR2_F23            | 16                                     |
| BR2_F24            | 15                                     |
| BR3_1              | 16                                     |
| BR3_2              | 17                                     |
| BR3_3              | 17                                     |
| BR3_4              | 17                                     |
| BR3_5              | 17                                     |
| BR3_6              | 16                                     |
| BR3_7              | 15                                     |
| BR3_8              | 15                                     |
| BR3_9              | 16                                     |
| BR3_10             | 16                                     |
| BR3_11             | 16                                     |
| BR3_12             | 16                                     |
| BR3_13             | 15                                     |
| BR3_14             | 15                                     |
| BR3_15             | 15                                     |
| BR3_16             | 15                                     |
| BR3_17             | 14                                     |
| BR3_18             | 13                                     |
| BR3_19             | 13                                     |
| BR3_20             | 14                                     |
| BR3_21             | 15                                     |
| BR3_22             | 15                                     |
| BR3_23             | 15                                     |
| BR3_24             | 14                                     |
| HG001_AOFS_BR1_F1  | 17                                     |
| HG001_AOFS_BR1_F2  | 17                                     |
| HG001_AOFS_BR1_F3  | 17                                     |
| HG001_AOFS_BR1_F4  | 17                                     |
| HG001_AOFS_BR1_F5  | 17                                     |
| HG001_AOFS_BR1_F6  | 17                                     |
| HG001_AOFS_BR1_F7  | 16                                     |
| HG001_AOFS_BR1_F8  | 17                                     |
| HG001_AOFS_BR1_F9  | 17                                     |
| HG001_AOFS_BR1_F10 | 17                                     |
| HG001_AOFS_BR1_F11 | 17                                     |
| HG001_AOFS_BR1_F12 | 17                                     |
| HG001_AOFS_BR1_F13 | 17                                     |
| HG001_AOFS_BR1_F14 | 17                                     |
| HG001_AOFS_BR1_F15 | 17                                     |
| HG001_AOFS_BR1_F16 | 17                                     |
| HG001_AOFS_BR1_F17 | 16                                     |
| HG001_AOFS_BR1_F18 | 16                                     |
| HG001_AOFS_BR1_F19 | 16                                     |
| HG001_AOFS_BR1_F20 | 16                                     |
| HG001_AOFS_BR1_F21 | 16                                     |
| HG001_AOFS_BR1_F22 | 15                                     |
| HG001_AOFS_BR1_F23 | 16                                     |
| HG001_AOFS_BR1_F24 | 16                                     |

| <i>threshold score</i><br>used for accepting individual spectra<br>(continued) | file                        | ion score threshold<br>with $p < 0.05$ |
|--------------------------------------------------------------------------------|-----------------------------|----------------------------------------|
|                                                                                | HG001_AOFS_BR2_F1           | 17                                     |
|                                                                                | HG001_AOFS_BR2_F2           | 17                                     |
|                                                                                | HG001_AOFS_BR2_F3           | 17                                     |
|                                                                                | HG001_AOFS_BR2_F4           | 17                                     |
|                                                                                | HG001_AOFS_BR2_F5           | 17                                     |
|                                                                                | HG001_AOFS_BR2_F6           | 17                                     |
|                                                                                | HG001_AOFS_BR2_F7           | 17                                     |
|                                                                                | HG001_AOFS_BR2_F8           | 17                                     |
|                                                                                | HG001_AOFS_BR2_F9           | 17                                     |
|                                                                                | HG001_AOFS_BR2_F10          | 17                                     |
|                                                                                | HG001_AOFS_BR2_F11          | 17                                     |
|                                                                                | HG001_AOFS_BR2_F12          | 17                                     |
|                                                                                | HG001_AOFS_BR2_F13          | 17                                     |
|                                                                                | HG001_AOFS_BR2_F14          | 17                                     |
|                                                                                | HG001_AOFS_BR2_F15          | 17                                     |
|                                                                                | HG001_AOFS_BR2_F16          | 17                                     |
|                                                                                | HG001_AOFS_BR2_F17          | 16                                     |
|                                                                                | HG001_AOFS_BR2_F18          | 16                                     |
|                                                                                | HG001_AOFS_BR2_F19          | 16                                     |
|                                                                                | HG001_AOFS_BR2_F20          | 16                                     |
|                                                                                | HG001_AOFS_BR2_F21          | 16                                     |
|                                                                                | HG001_AOFS_BR2_F22          | 16                                     |
|                                                                                | HG001_AOFS_BR2_F23          | 16                                     |
|                                                                                | HG001_AOFS_BR2_F24          | 16                                     |
|                                                                                | HG001_AOFS_BR3_F1           | 17                                     |
|                                                                                | HG001_AOFS_BR3_F2           | 17                                     |
|                                                                                | HG001_AOFS_BR3_F3           | 17                                     |
|                                                                                | HG001_AOFS_BR3_F4           | 17                                     |
|                                                                                | HG001_AOFS_BR3_F5           | 17                                     |
|                                                                                | HG001_AOFS_BR3_F6           | 17                                     |
|                                                                                | HG001_AOFS_BR3_F7           | 17                                     |
|                                                                                | HG001_AOFS_BR3_F8           | 17                                     |
|                                                                                | HG001_AOFS_BR3_F9           | 17                                     |
|                                                                                | HG001_AOFS_BR3_F10          | 17                                     |
|                                                                                | HG001_AOFS_BR3_F11          | 17                                     |
|                                                                                | HG001_AOFS_BR3_F12          | 17                                     |
|                                                                                | HG001_AOFS_BR3_F13          | 17                                     |
|                                                                                | HG001_AOFS_BR3_F14          | 17                                     |
|                                                                                | HG001_AOFS_BR3_F15          | 17                                     |
|                                                                                | HG001_AOFS_BR3_F16          | 17                                     |
|                                                                                | HG001_AOFS_BR3_F17          | 16                                     |
|                                                                                | HG001_AOFS_BR3_F18          | 17                                     |
|                                                                                | HG001_AOFS_BR3_F19          | 16                                     |
|                                                                                | HG001_AOFS_BR3_F20          | 16                                     |
|                                                                                | HG001_AOFS_BR3_F21          | 16                                     |
|                                                                                | HG001_AOFS_BR3_F22          | 16                                     |
|                                                                                | HG001_AOFS_BR3_F23          | 16                                     |
|                                                                                | HG001_AOFS_BR3_F24          | 16                                     |
|                                                                                | Salt_Steps_2mM_AOFS_BR1_1   | 17                                     |
|                                                                                | Salt_Steps_2mM_AOFS_BR2_1   | 17                                     |
|                                                                                | Salt_Steps_2mM_AOFS_BR3_1   | 17                                     |
|                                                                                | Salt_Steps_10mM_AOFS_BR1_2  | 17                                     |
|                                                                                | Salt_Steps_10mM_AOFS_BR2_2  | 17                                     |
|                                                                                | Salt_Steps_10mM_AOFS_BR3_2  | 17                                     |
|                                                                                | Salt_Steps_20mM_AOFS_BR1_3  | 18                                     |
|                                                                                | Salt_Steps_20mM_AOFS_BR2_3  | 18                                     |
|                                                                                | Salt_Steps_20mM_AOFS_BR3_3  | 18                                     |
|                                                                                | Salt_Steps_50mM_AOFS_BR1_4  | 18                                     |
|                                                                                | Salt_Steps_50mM_AOFS_BR2_4  | 18                                     |
|                                                                                | Salt_Steps_50mM_AOFS_BR3_4  | 18                                     |
|                                                                                | Salt_Steps_100mM_AOFS_BR1_5 | 18                                     |
|                                                                                | Salt_Steps_100mM_AOFS_BR2_5 | 18                                     |
|                                                                                | Salt_Steps_100mM_AOFS_BR3_5 | 18                                     |
|                                                                                | Salt_Steps_200mM_AOFS_BR1_6 | 18                                     |
|                                                                                | Salt_Steps_200mM_AOFS_BR2_6 | 18                                     |
|                                                                                | Salt_Steps_200mM_AOFS_BR3_6 | 18                                     |
|                                                                                | Salt_Steps_500mM_AOFS_BR1_7 | 18                                     |
|                                                                                | Salt_Steps_500mM_AOFS_BR2_7 | 18                                     |
|                                                                                | Salt_Steps_500mM_AOFS_BR3_7 | 18                                     |
|                                                                                | Staph_UT_BR1                | 17                                     |
|                                                                                | Staph_UT_BR2                | 17                                     |
|                                                                                | Staph_UT_BR3                | 17                                     |

## False Discovery Rates

### Percolator score FDR

(Kall, L., Canterbury, J. D., Weston, J., Noble, W. S., MacCoss, M. J., Semi-supervised learning for peptide identification from shotgun proteomics datasets. Nature methods 2007, 4, 923-925.)

FDR was calculated by a target decoy approach (TDA) in combination with the Percolator score.

minimum = 0; maximum = 2.75; mean = 0.25;  
median = 0.19; standard deviation = 0.32  
(calculated from all data sets)

| file               | FDR  |
|--------------------|------|
| BR2_F1             | 0.31 |
| BR2_F2             | 0.09 |
| BR2_F3             | 0.21 |
| BR2_F4             | 0.16 |
| BR2_F5             | 0.3  |
| BR2_F6             | 0.1  |
| BR2_F7             | 0.09 |
| BR2_F8             | 0.22 |
| BR2_F9             | 0.22 |
| BR2_F10            | 0    |
| BR2_F11            | 0.24 |
| BR2_F12            | 0.32 |
| BR2_F13            | 0.26 |
| BR2_F14            | 0.37 |
| BR2_F15            | 0.65 |
| BR2_F16            | 0.39 |
| BR2_F17            | 0    |
| BR2_F18            | 0    |
| BR2_F19            | 0.32 |
| BR2_F20            | 0.11 |
| BR2_F21            | 0.63 |
| BR2_F22            | 0.42 |
| BR2_F23            | 0.42 |
| BR2_F24            | 0.35 |
| BR3_1              | 0.16 |
| BR3_2              | 0.12 |
| BR3_3              | 0.11 |
| BR3_4              | 0.14 |
| BR3_5              | 0.10 |
| BR3_6              | 0.32 |
| BR3_7              | 0.17 |
| BR3_8              | 0.22 |
| BR3_9              | 0.34 |
| BR3_10             | 0.48 |
| BR3_11             | 0.42 |
| BR3_12             | 0.26 |
| BR3_13             | 0.24 |
| BR3_14             | 0.57 |
| BR3_15             | 0.00 |
| BR3_16             | 0.00 |
| BR3_17             | 0.00 |
| BR3_18             | 0.00 |
| BR3_19             | 0.00 |
| BR3_20             | 0.75 |
| BR3_21             | 0.48 |
| BR3_22             | 0.23 |
| BR3_23             | 0.27 |
| BR3_24             | 0.23 |
| HG001_AOFS_BR1_F1  | 0.13 |
| HG001_AOFS_BR1_F2  | 0.06 |
| HG001_AOFS_BR1_F3  | 0.17 |
| HG001_AOFS_BR1_F4  | 0.13 |
| HG001_AOFS_BR1_F5  | 0.64 |
| HG001_AOFS_BR1_F6  | 0.28 |
| HG001_AOFS_BR1_F7  | 0.20 |
| HG001_AOFS_BR1_F8  | 0.00 |
| HG001_AOFS_BR1_F9  | 0.24 |
| HG001_AOFS_BR1_F10 | 0.27 |
| HG001_AOFS_BR1_F11 | 0.24 |
| HG001_AOFS_BR1_F12 | 0.21 |
| HG001_AOFS_BR1_F13 | 0.46 |
| HG001_AOFS_BR1_F14 | 0.00 |
| HG001_AOFS_BR1_F15 | 0.26 |
| HG001_AOFS_BR1_F16 | 0.20 |
| HG001_AOFS_BR1_F17 | 0.00 |
| HG001_AOFS_BR1_F18 | 1.89 |
| HG001_AOFS_BR1_F19 | 0.00 |
| HG001_AOFS_BR1_F20 | 0.56 |
| HG001_AOFS_BR1_F21 | 0.51 |

*False Discovery Rates (continued)*

Percolator score FDR

| file                        | FDR  |
|-----------------------------|------|
| HG001_AOFS_BR1_F22          | 2.75 |
| HG001_AOFS_BR1_F23          | 0.00 |
| HG001_AOFS_BR1_F24          | 0.68 |
| HG001_AOFS_BR2_F1           | 0.06 |
| HG001_AOFS_BR2_F2           | 0.11 |
| HG001_AOFS_BR2_F3           | N/A  |
| HG001_AOFS_BR2_F4           | 0.11 |
| HG001_AOFS_BR2_F5           | 0.14 |
| HG001_AOFS_BR2_F6           | 0.17 |
| HG001_AOFS_BR2_F7           | 0.14 |
| HG001_AOFS_BR2_F8           | 0.12 |
| HG001_AOFS_BR2_F9           | 0.33 |
| HG001_AOFS_BR2_F10          | N/A  |
| HG001_AOFS_BR2_F11          | 0.28 |
| HG001_AOFS_BR2_F12          | 0.41 |
| HG001_AOFS_BR2_F13          | 0.20 |
| HG001_AOFS_BR2_F14          | 0.00 |
| HG001_AOFS_BR2_F15          | 0.18 |
| HG001_AOFS_BR2_F16          | 0.17 |
| HG001_AOFS_BR2_F17          | 0.00 |
| HG001_AOFS_BR2_F18          | 0.00 |
| HG001_AOFS_BR2_F19          | 0.00 |
| HG001_AOFS_BR2_F20          | 0.49 |
| HG001_AOFS_BR2_F21          | 0.31 |
| HG001_AOFS_BR2_F22          | 0.49 |
| HG001_AOFS_BR2_F23          | 0.47 |
| HG001_AOFS_BR2_F24          | 0.35 |
| HG001_AOFS_BR3_F1           | 0.13 |
| HG001_AOFS_BR3_F2           | 0.06 |
| HG001_AOFS_BR3_F3           | 0.11 |
| HG001_AOFS_BR3_F4           | 0.06 |
| HG001_AOFS_BR3_F5           | 0.09 |
| HG001_AOFS_BR3_F6           | 0.21 |
| HG001_AOFS_BR3_F7           | 0.00 |
| HG001_AOFS_BR3_F8           | 0.13 |
| HG001_AOFS_BR3_F9           | 0.50 |
| HG001_AOFS_BR3_F10          | 0.19 |
| HG001_AOFS_BR3_F11          | 0.23 |
| HG001_AOFS_BR3_F12          | 0.27 |
| HG001_AOFS_BR3_F13          | 0.89 |
| HG001_AOFS_BR3_F14          | 0.00 |
| HG001_AOFS_BR3_F15          | 0.26 |
| HG001_AOFS_BR3_F16          | 0.16 |
| HG001_AOFS_BR3_F17          | 0.00 |
| HG001_AOFS_BR3_F18          | 0.00 |
| HG001_AOFS_BR3_F19          | 0.00 |
| HG001_AOFS_BR3_F20          | 0.00 |
| HG001_AOFS_BR3_F21          | 0.39 |
| HG001_AOFS_BR3_F22          | 0.36 |
| HG001_AOFS_BR3_F23          | 0.44 |
| HG001_AOFS_BR3_F24          | 0.68 |
| Salt_Steps_2mM_AOFS_BR1_1   | N/A  |
| Salt_Steps_10mM_AOFS_BR1_2  | 0.27 |
| Salt_Steps_20mM_AOFS_BR1_3  | 0.25 |
| Salt_Steps_50mM_AOFS_BR1_4  | 0.3  |
| Salt_Steps_100mM_AOFS_BR1_5 | 0.08 |
| Salt_Steps_200mM_AOFS_BR1_6 | 0.04 |
| Salt_Steps_50mM_AOFS_BR1_7  | 0.11 |
| Salt_Steps_2mM_AOFS_BR2_1   | 0.04 |
| Salt_Steps_10mM_AOFS_BR2_2  | 0.16 |
| Salt_Steps_20mM_AOFS_BR2_3  | 0.09 |
| Salt_Steps_50mM_AOFS_BR2_4  | 0.16 |
| Salt_Steps_100mM_AOFS_BR2_5 | 0.07 |
| Salt_Steps_200mM_AOFS_BR2_6 | 0.00 |
| Salt_Steps_50mM_AOFS_BR2_7  | 0.1  |
| Salt_Steps_2mM_AOFS_BR3_1   | 0.47 |
| Salt_Steps_10mM_AOFS_BR3_2  | 0.13 |
| Salt_Steps_20mM_AOFS_BR3_3  | 0.17 |
| Salt_Steps_50mM_AOFS_BR3_4  | 0.22 |
| Salt_Steps_100mM_AOFS_BR3_5 | 0.12 |
| Salt_Steps_200mM_AOFS_BR3_6 | 0.05 |
| Salt_Steps_50mM_AOFS_BR3_7  | 0.17 |
| Staph_UT_BR1                | 0.38 |
| Staph_UT_BR2                | 0.48 |
| Staph_UT_BR3                | 0    |

## Supplemental Figure S1

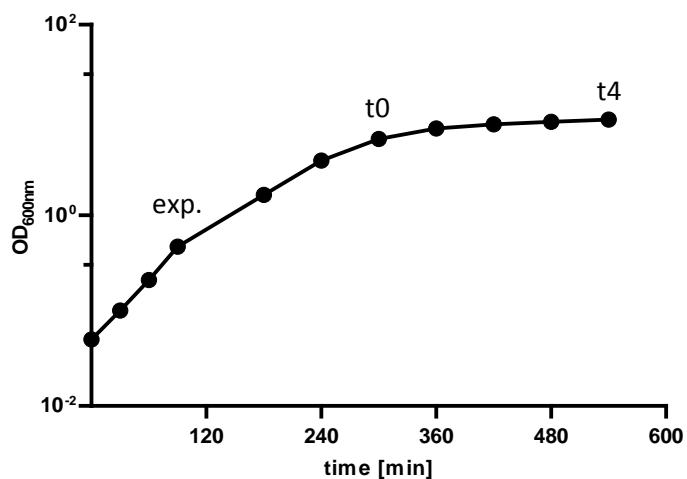

### **Growth curve of *S. aureus* HG001 in TSB.**

One representative curve of three biological replicates is depicted. Sampling points are indicated.

## Supplemental Figure S2

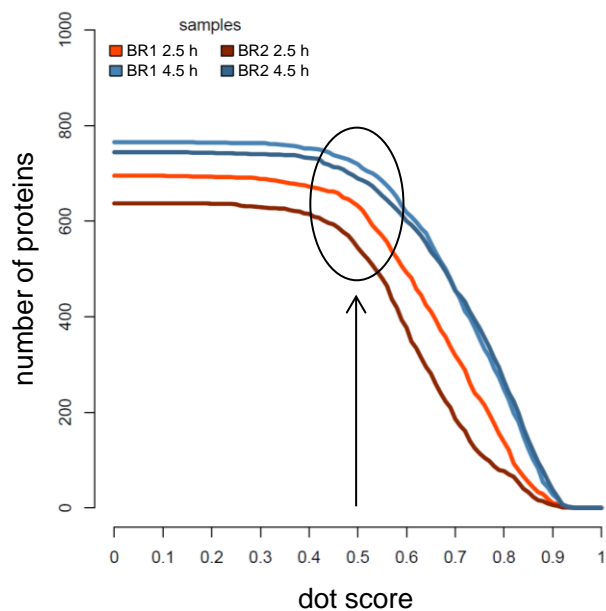

### **Number of identified proteins depending on score values.**

The numbers of identified proteins are plotted depending on the dot score values in identification search using the spectral library generated in this study.

The arrow and circle indicate the region where the dot score starts discriminating true identifications from unspecific false identifications.

# Supplemental Figure S3

|                      | detected proteins |      | proteins not detected |      |
|----------------------|-------------------|------|-----------------------|------|
|                      | number            | %    | number                | %    |
| <b>total</b>         | 2088              | 100  | 803                   | 100  |
| <b>localization:</b> |                   |      |                       |      |
| cytoplasmic          | 1191              | 57.0 | 143                   | 17.8 |
| cytoplasmic membrane | 437               | 20.9 | 342                   | 42.6 |
| cell wall            | 38                | 1.8  | 2                     | 0.2  |
| extracellular        | 56                | 2.7  | 53                    | 6.6  |
| unknown              | 366               | 17.5 | 263                   | 32.8 |

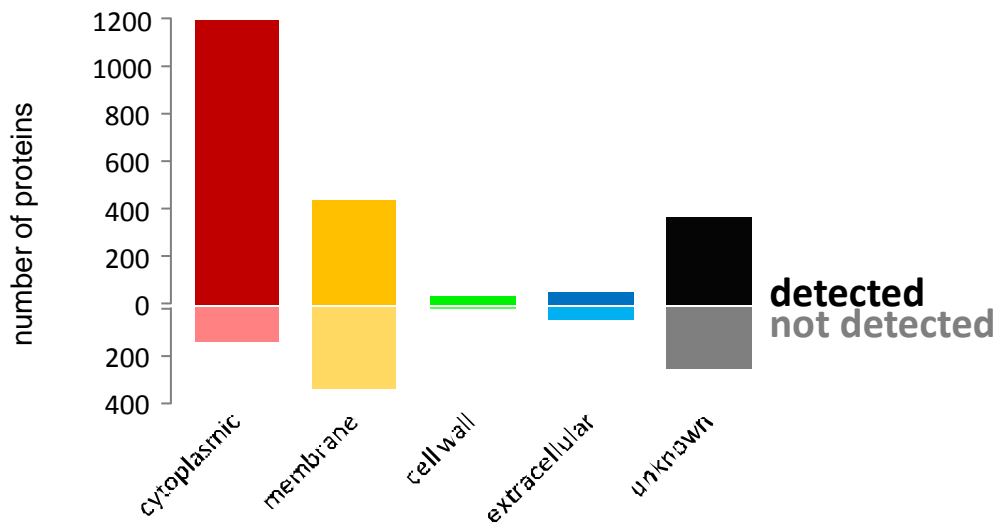

## Localization of detected and non-detected proteins of *S. aureus* HG001.

Localization of proteins is depicted according to the PSort annotation. The upper part of the graph indicates numbers of detected proteins, while the lower part shows the numbers on non-detected proteins.

## Supplemental Figure S4

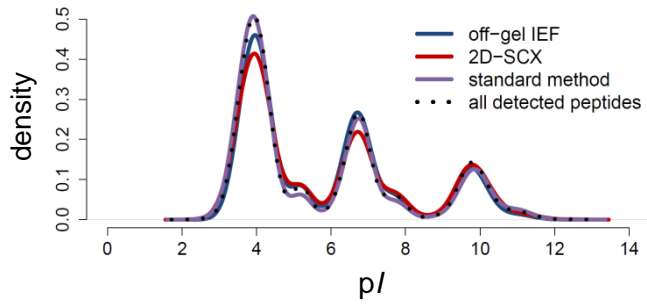

### **Comparison of the distribution of peptide identifications along the pI range for the three methods under investigation.**

pI values of detected peptides were exported from the ProteomeCenter tool. The density function and plots were generated using R scripts.



# Supplemental Figure S5

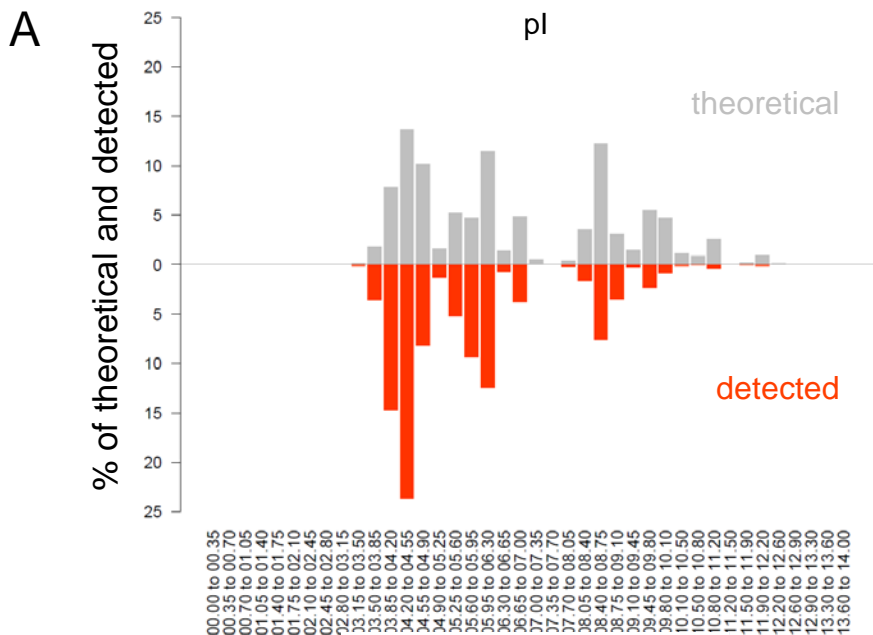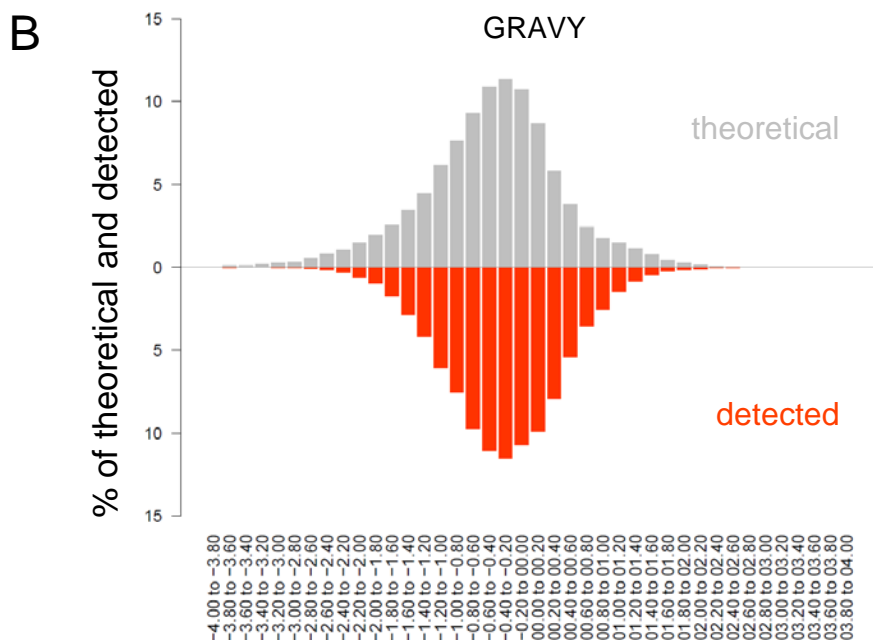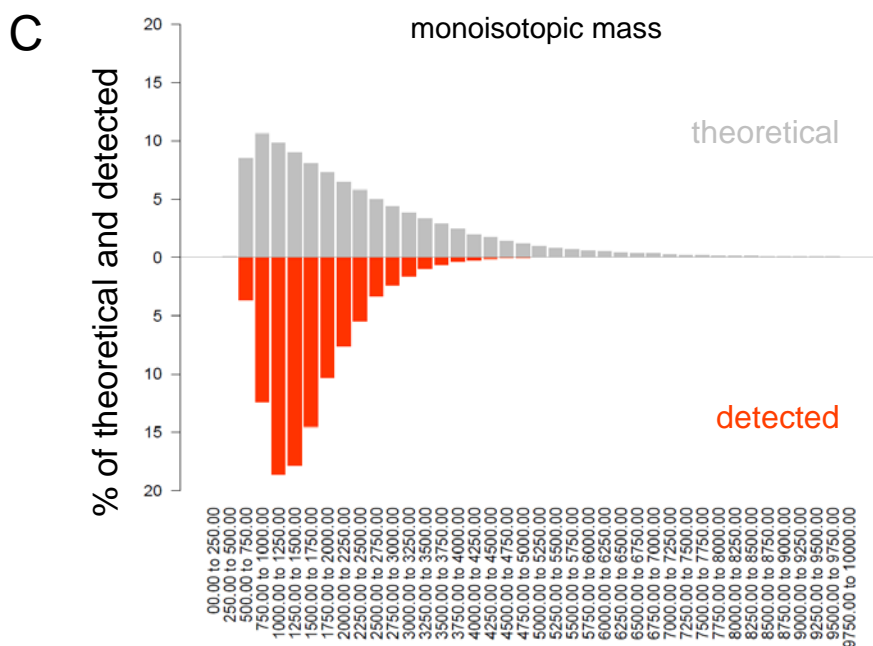

**Characterization of the detected peptides and peptides retrieved from an *in silico* digestion by physicochemical properties.**

The frequency of peptides is depicted in classes of pI values (A), GRAVY score (B), and monoisotopic mass (C). The upper part of the histograms refers to the set of theoretical peptides from the *in silico* digestion (gray), and the lower part of the histograms displays the data set of detected peptides (orange).

# Supplemental Figure S6 A – emPAI –

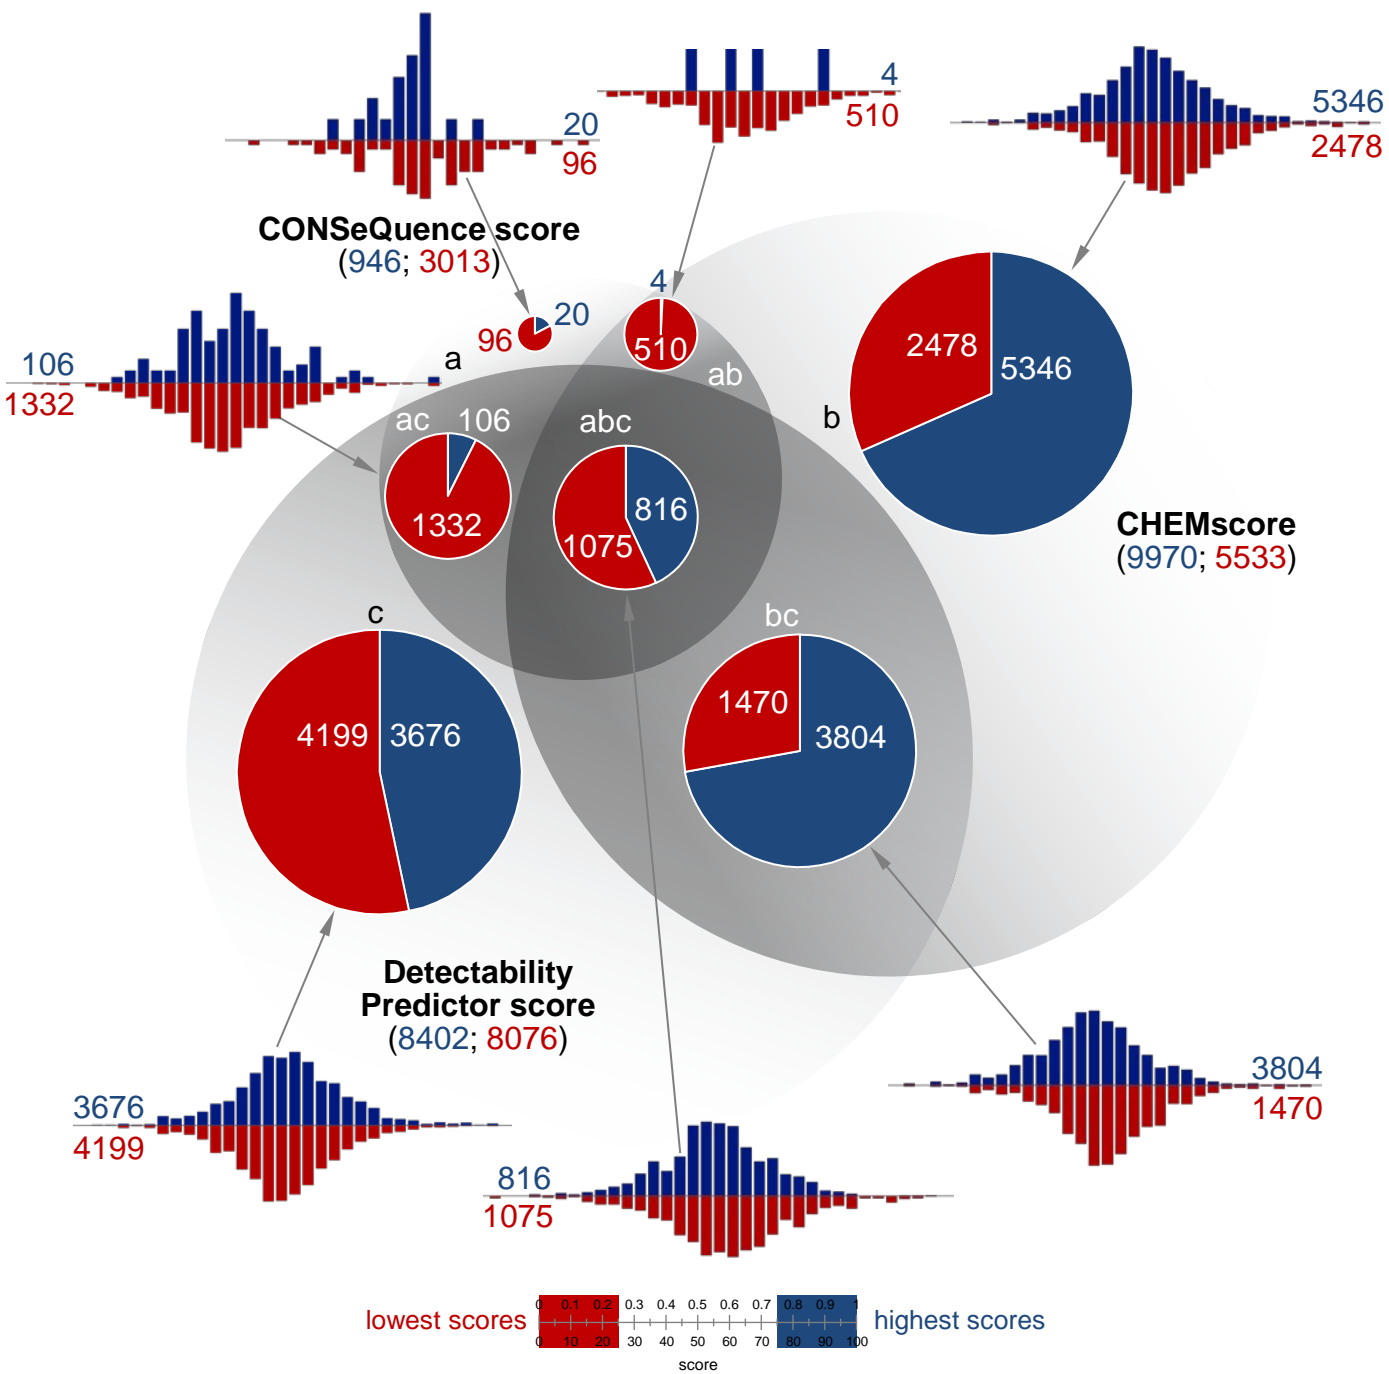

# Supplemental Figure S6 B – p/–

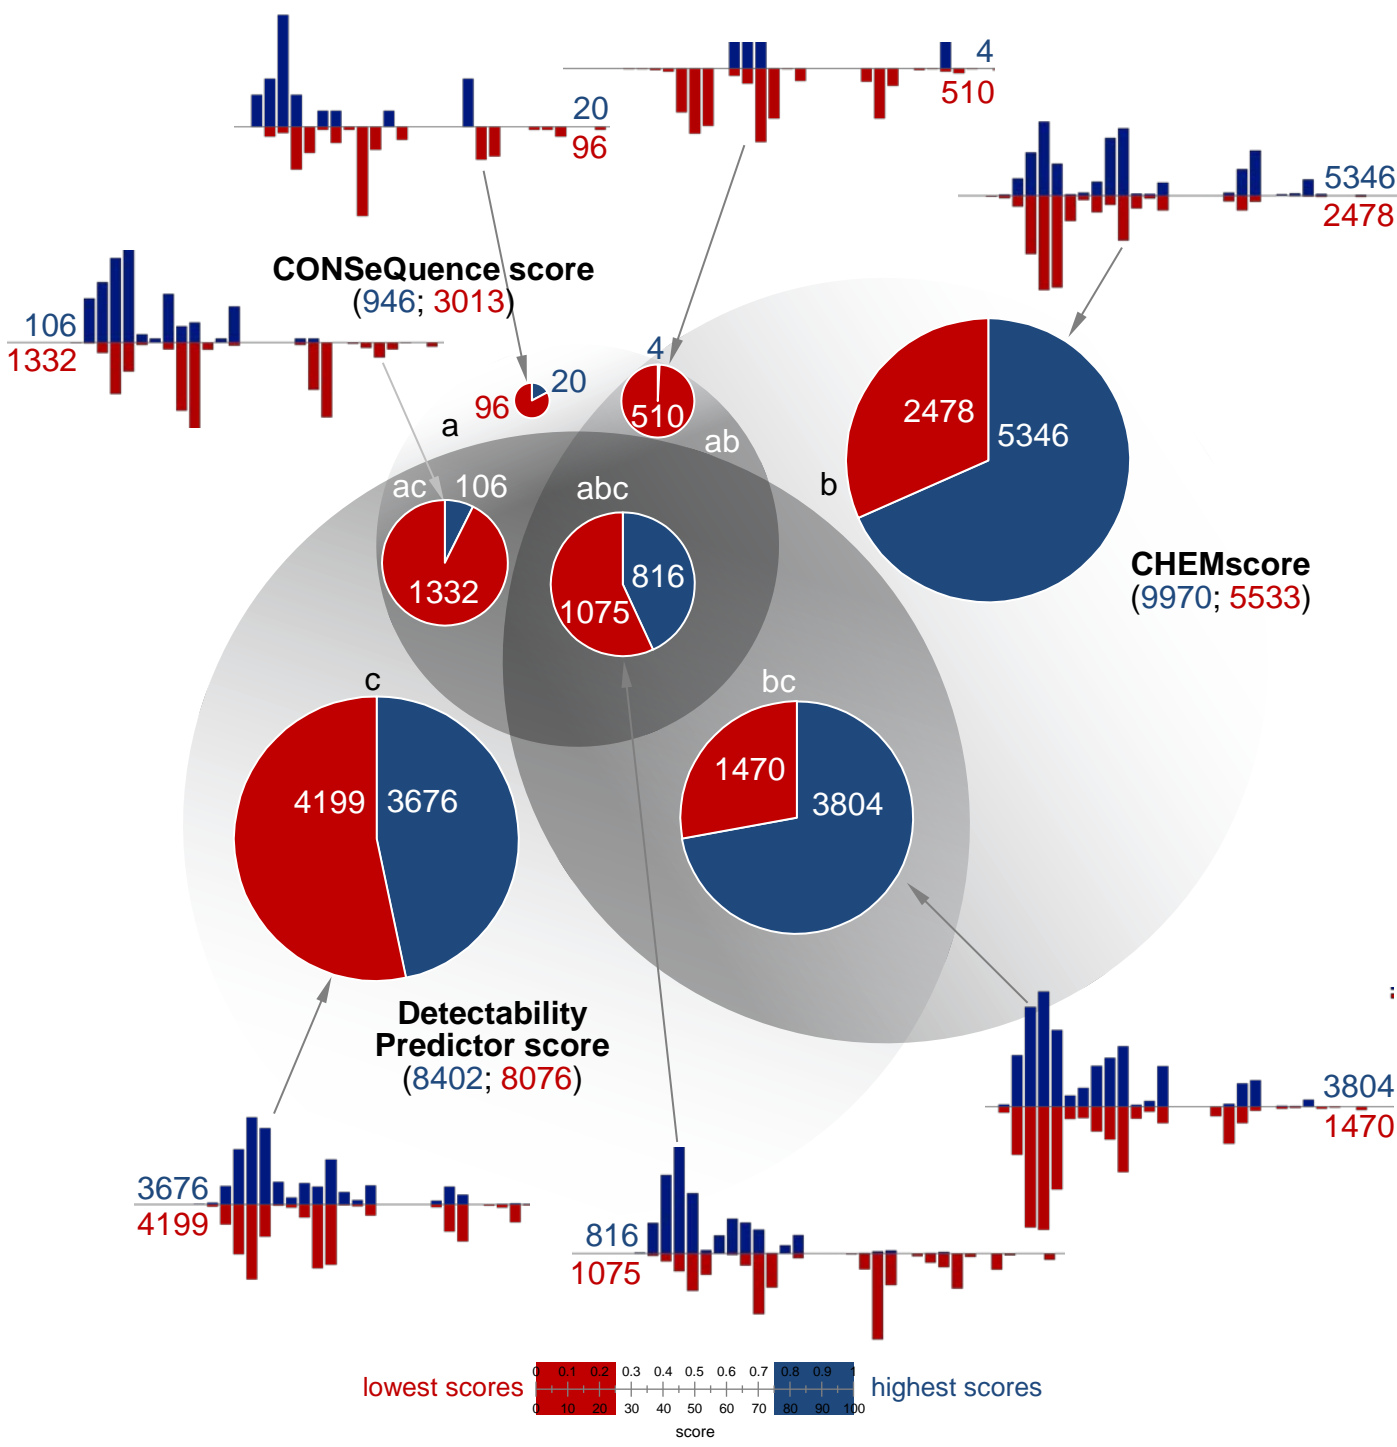

# Supplemental Figure S6 C – GRAVY –

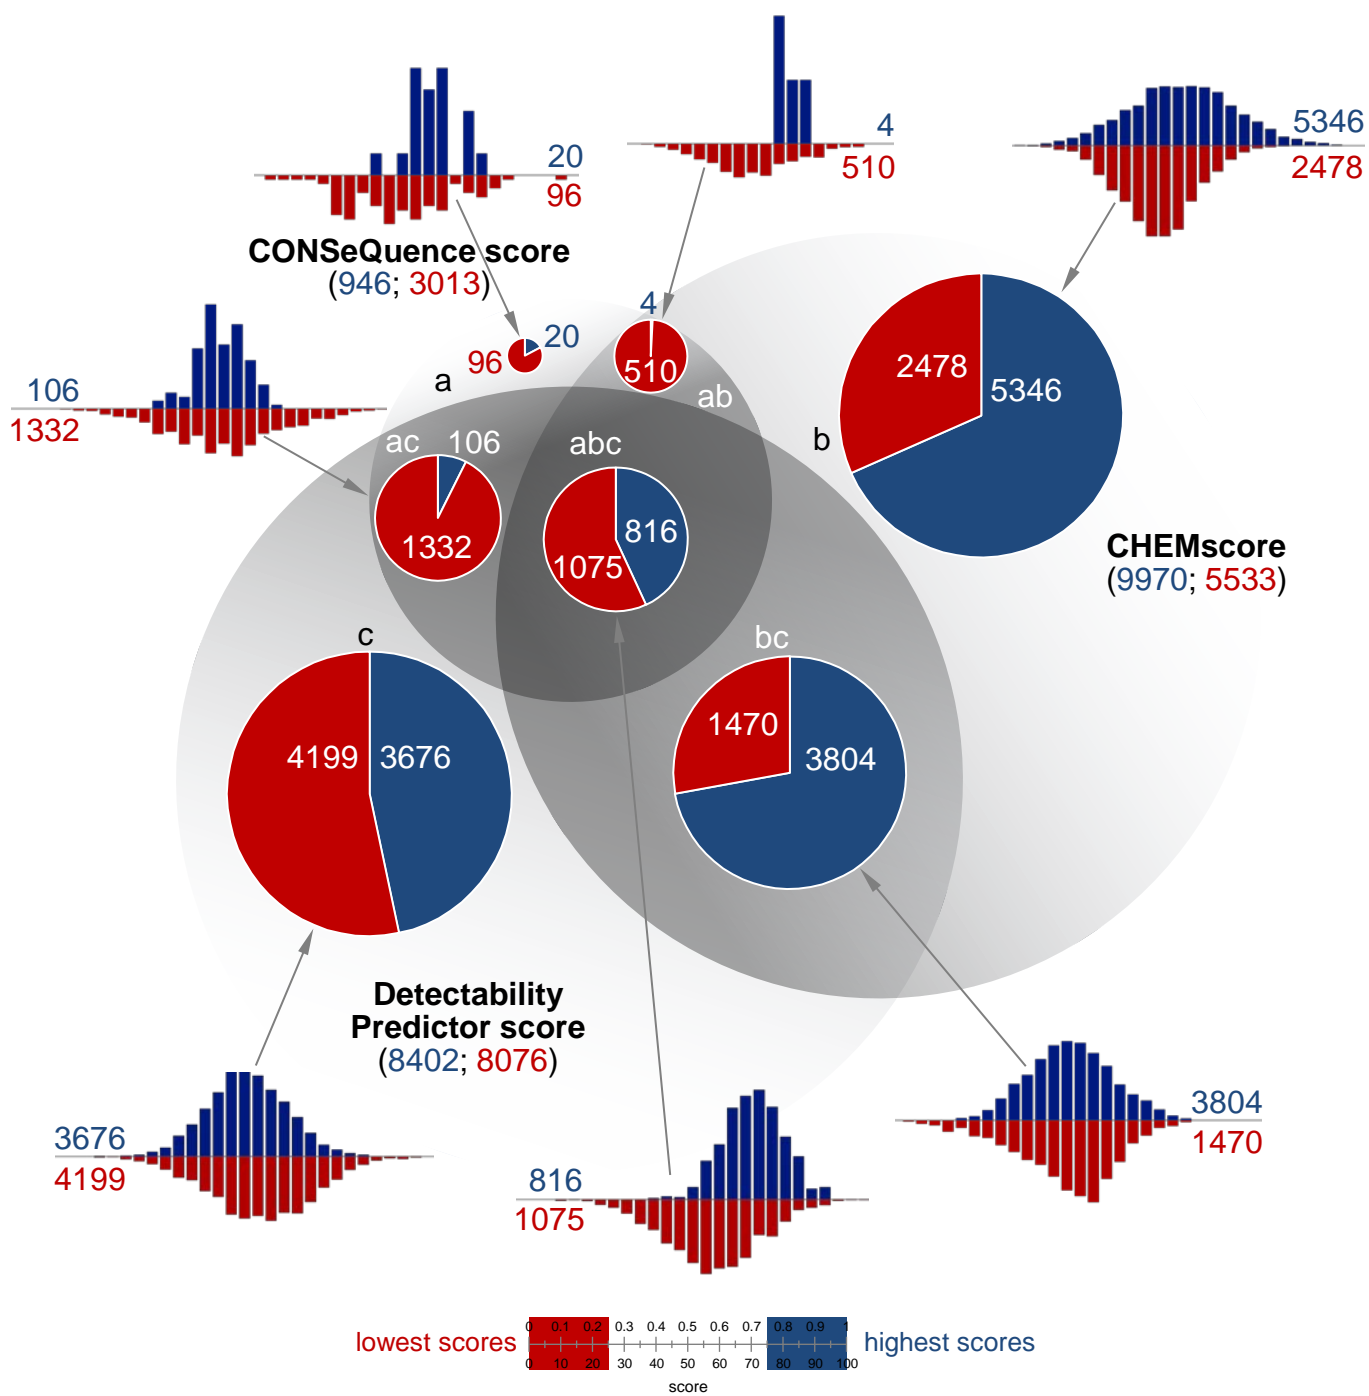

## (Supplemental Figure S6)

### **Comparison of detected peptides with the lowest and the highest score values.**

Venn diagrams depict the comparison of peptides with CONSeQuence score  $> 0.75$ , CHEMscore  $> 75$ , and DetectabilityPredictor score  $> 0.75$ , which constitute groups of high score values (colored blue), and of peptides with CONSeQuence score  $< 0.25$ , CHEMscore  $< 25$ , and DetectabilityPredictor score  $< 0.25$ , which were selected as groups of low score values (colored red). Superimposed on the Venn diagram subsets, pie charts correlated by area show the number of peptides with highest and lowest score values. The pie charts are furthermore labeled with the small type characters a (CONSeQuence score), b (CHEMscore), and c (DetectabilityPredictor score) or combinations of them in order to indicate the corresponding Venn diagram intersections. Associated histograms show the distribution and frequency of emPAI (A), pI (B), and GRAVY score (C) values for the subsets of the Venn diagrams. Again, blue indicates the group with highest score values, red marks the group with lowest score values. The x-axis shows categories of values. The y-axis indicates the percentage of values in the corresponding category.



# Supplemental Figure S7

A

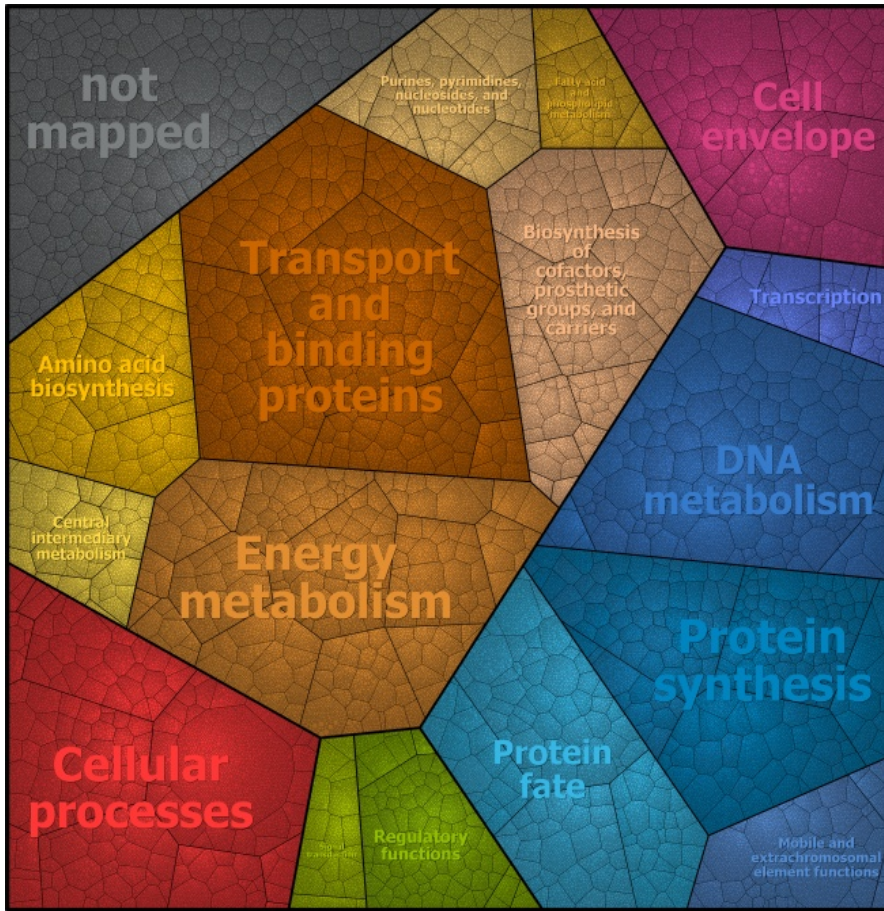

overview

B

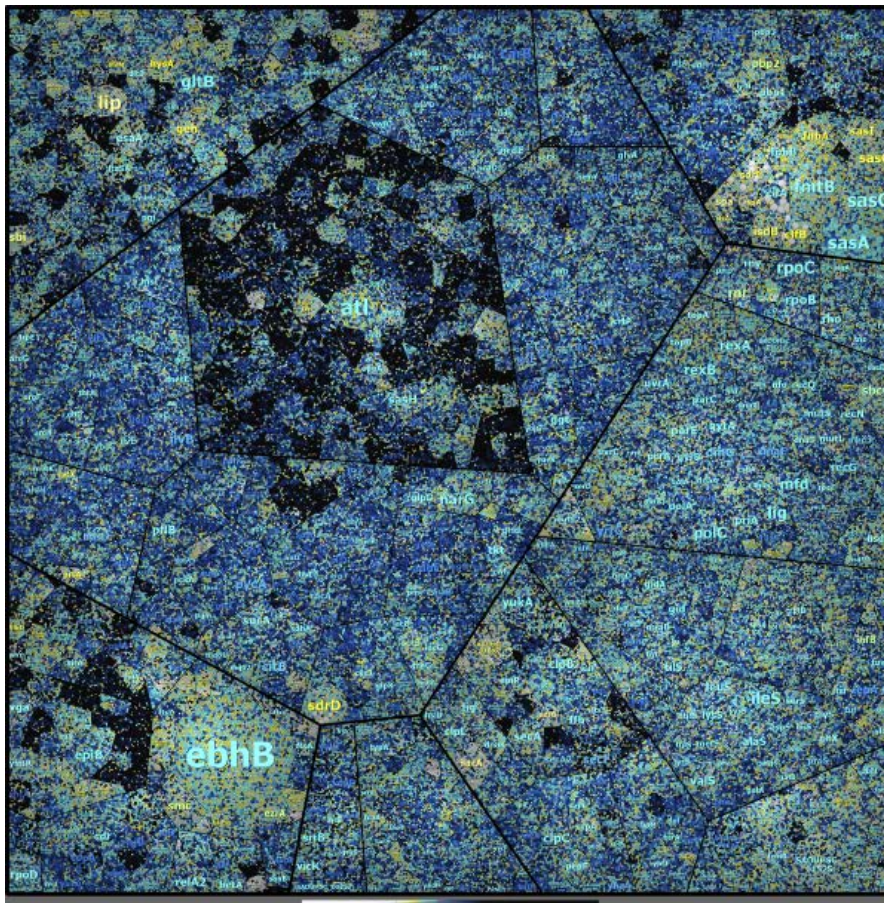

GRAVY



# Supplemental Figure S7

C

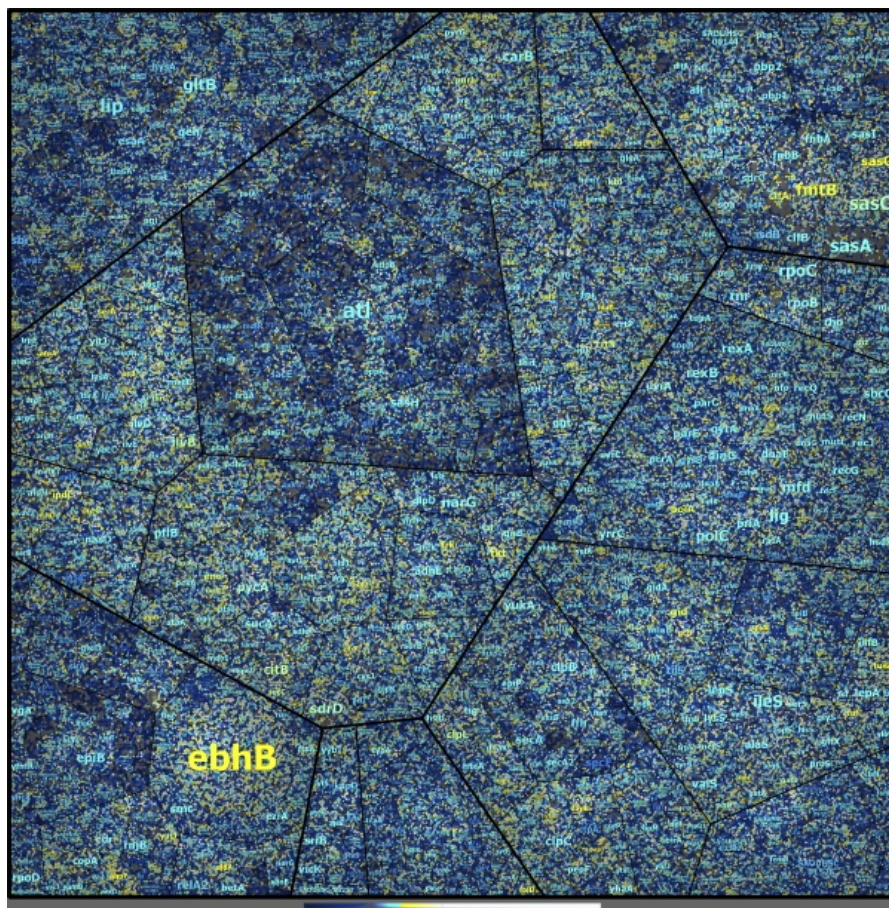

CONSeQuence  
score

D

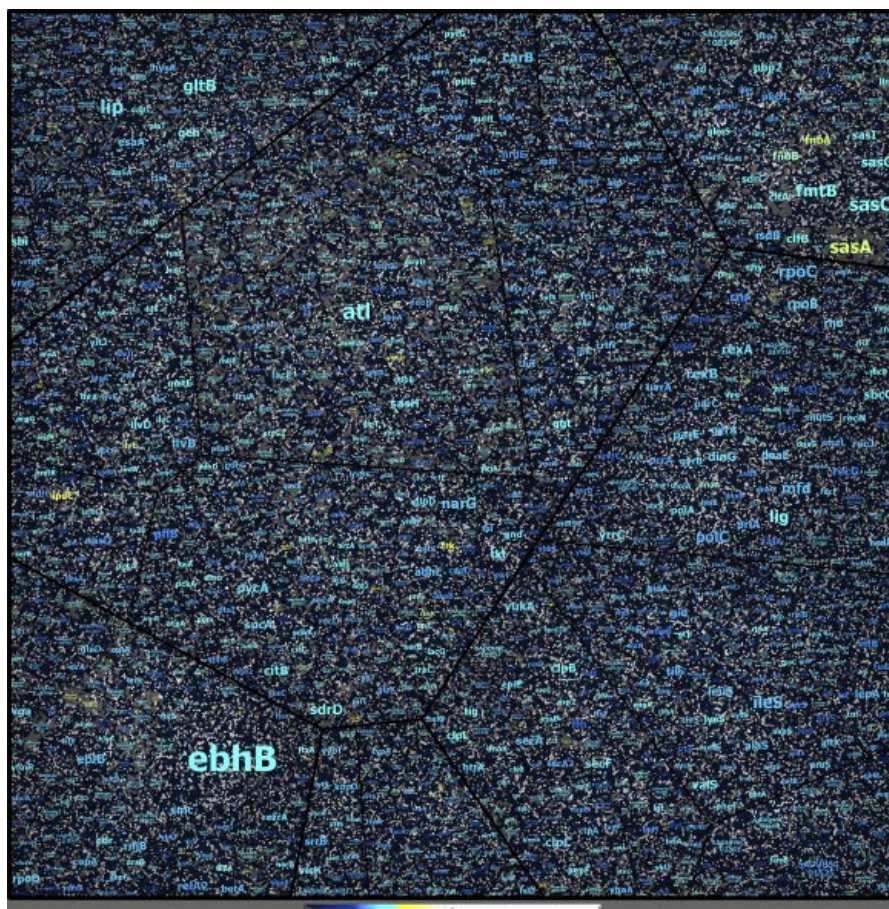

CHEMscore



## Supplemental Figure S7

E

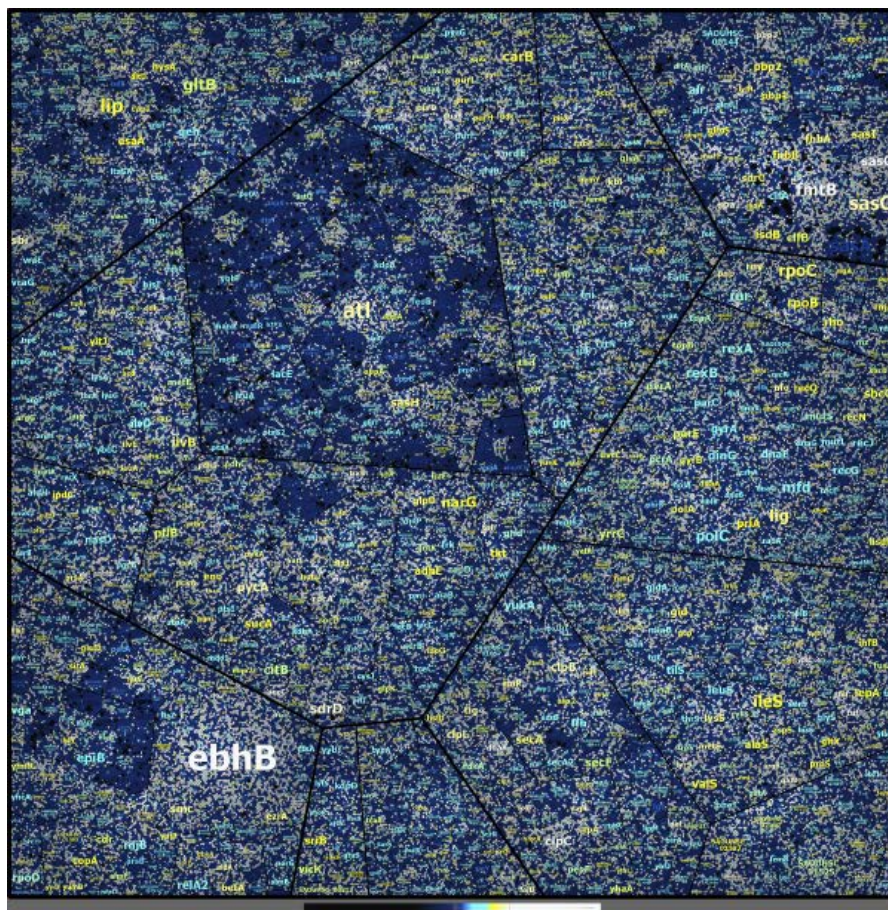

Detectability  
Predictor  
score

### Representation of physicochemical parameters and score values of peptides from an *in silico* digest.

The Voronoi treemap was created on the basis the TIGRFAM protein family classification scheme [Haft et al. (2001) *Nucleic acids research* 29, 41-43] by using HMMER/HMMScan [Finn et al. (2011) *Nucleic acids research* 39, W29-37]. Peptides form the lowest level of area subdivision. The area per peptide represents the peptide length (number of amino acids). Therefore, the area per protein correlates with the protein size. Additionally, the protein label size correlates with the protein size. The overview of the included functional annotations (A) is valid for all parameter-colored Voronoi treemaps. The Voronoi treemap contains about 220,245 theoretically expected peptides from an *in silico* digestion.

Coloring indicates different GRAVY score values (B), CONSeQuence score values (C), CHEMscore values (D), and DetectabilityPredictor score values (E).

Small GRAVY score values, which indicate less hydrophobic peptides, are colored white, high GRAVY score values, which indicate very hydrophobic peptides, are indicated in dark blue, intermediate GRAVY score values are colored yellow or light blue (B). Missing values are indicated in gray (B).

High CONSeQuence score values (C), CHEMscore values (D), and DetectabilityPredictor score values (E) are indicated in white, low score values in dark blue. Intermediate values are colored light blue and yellow (C, D, E). Missing values are indicated in black (C, D, E).



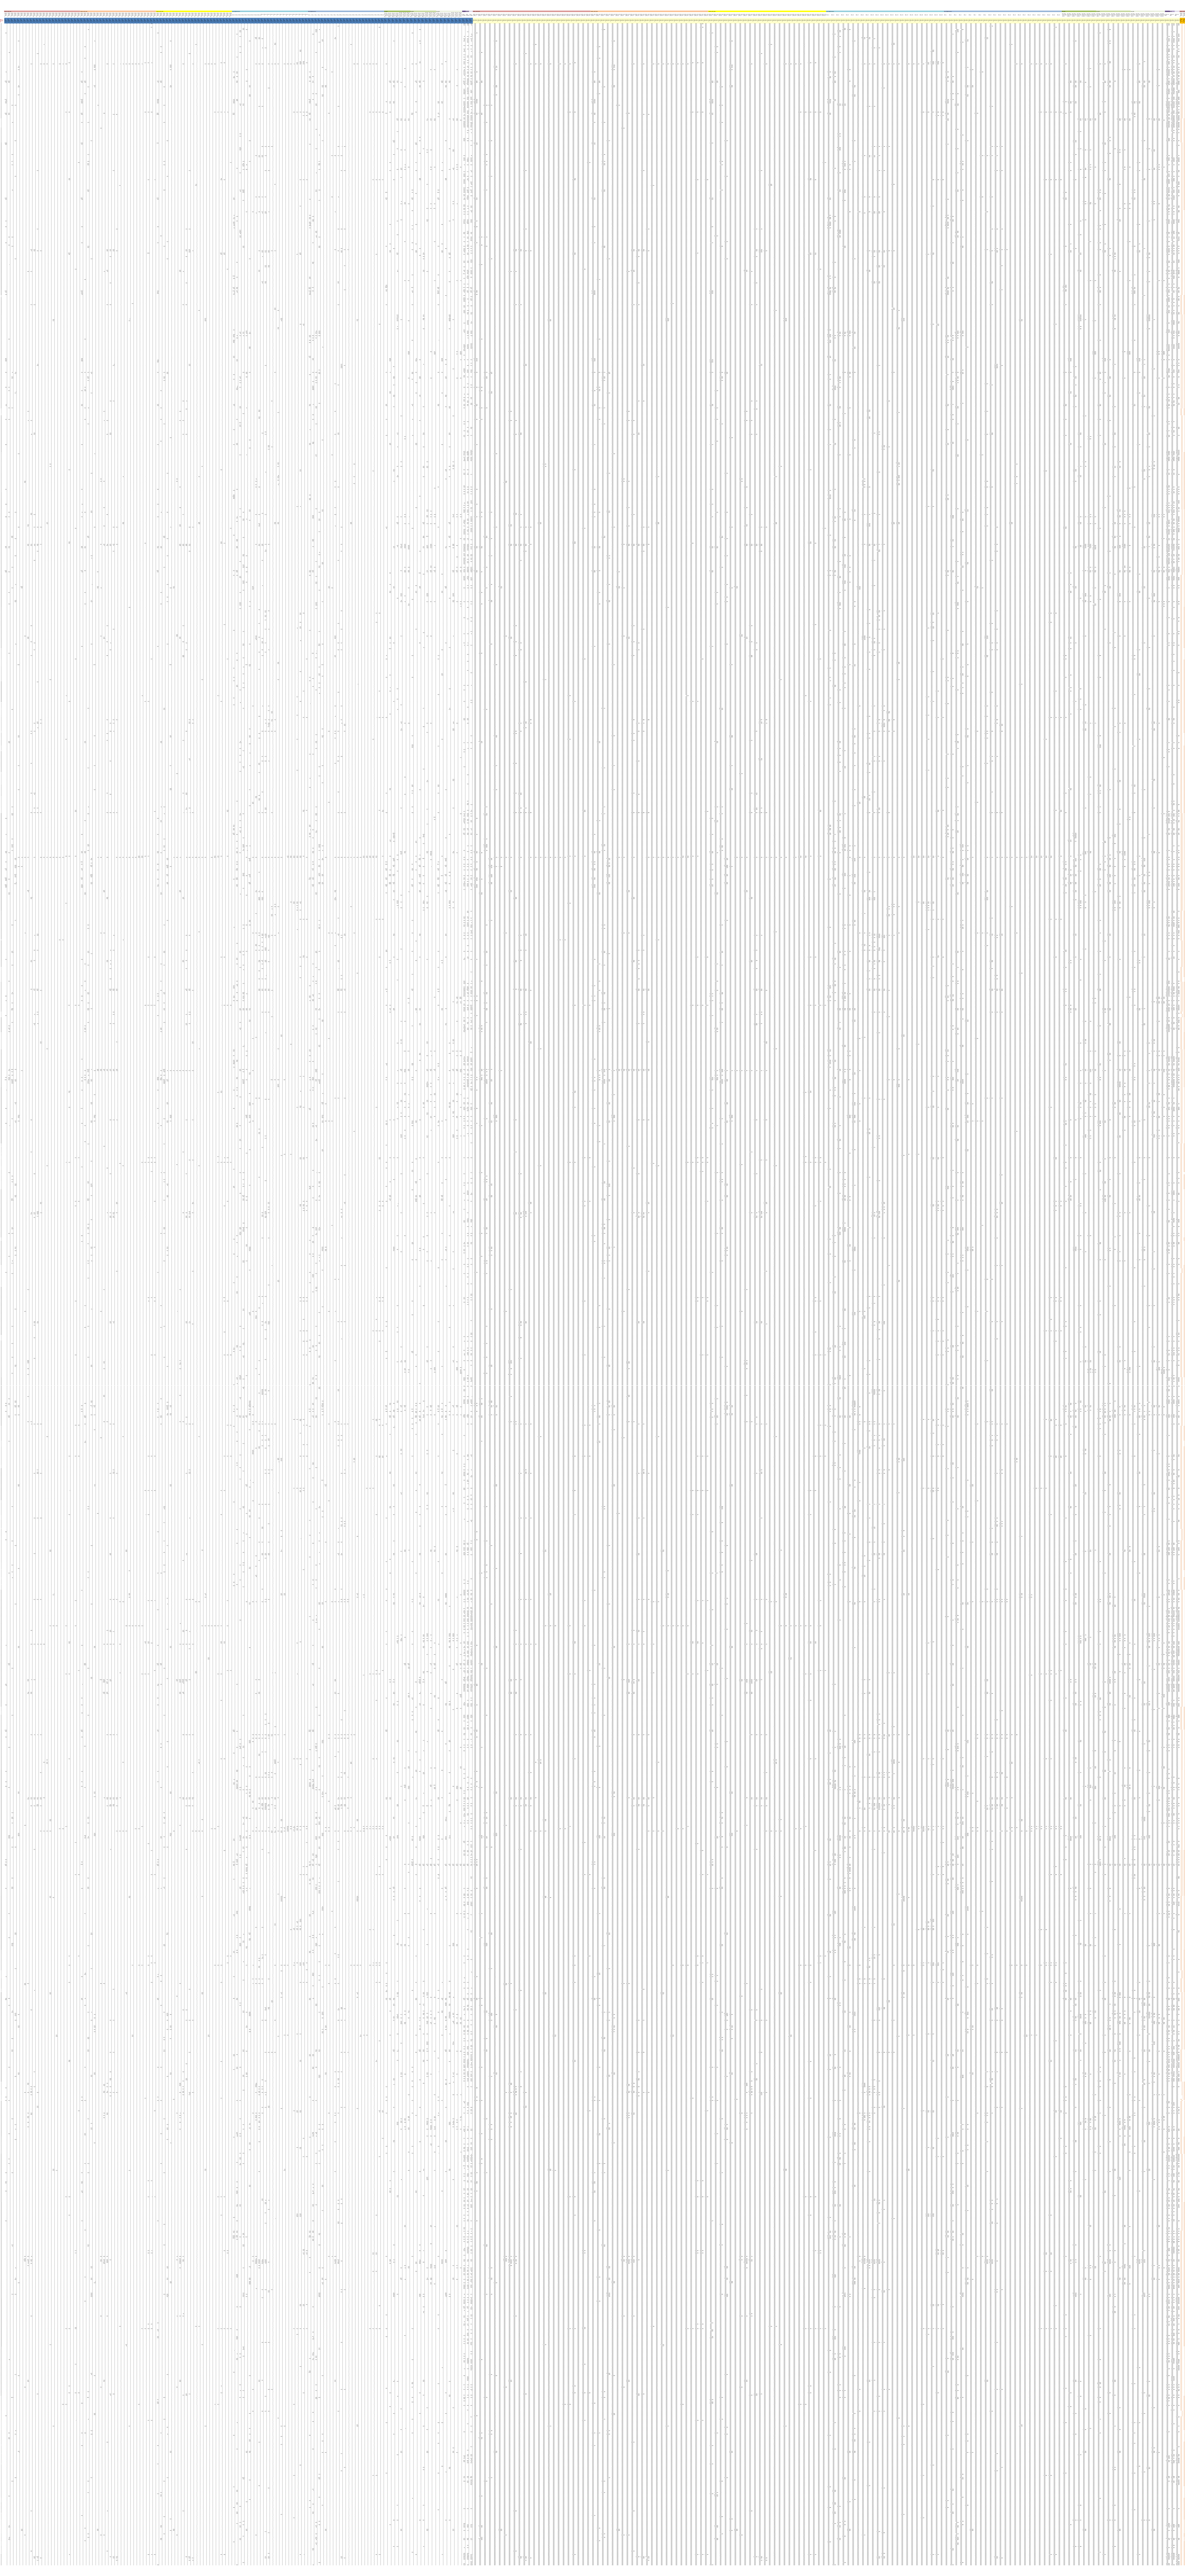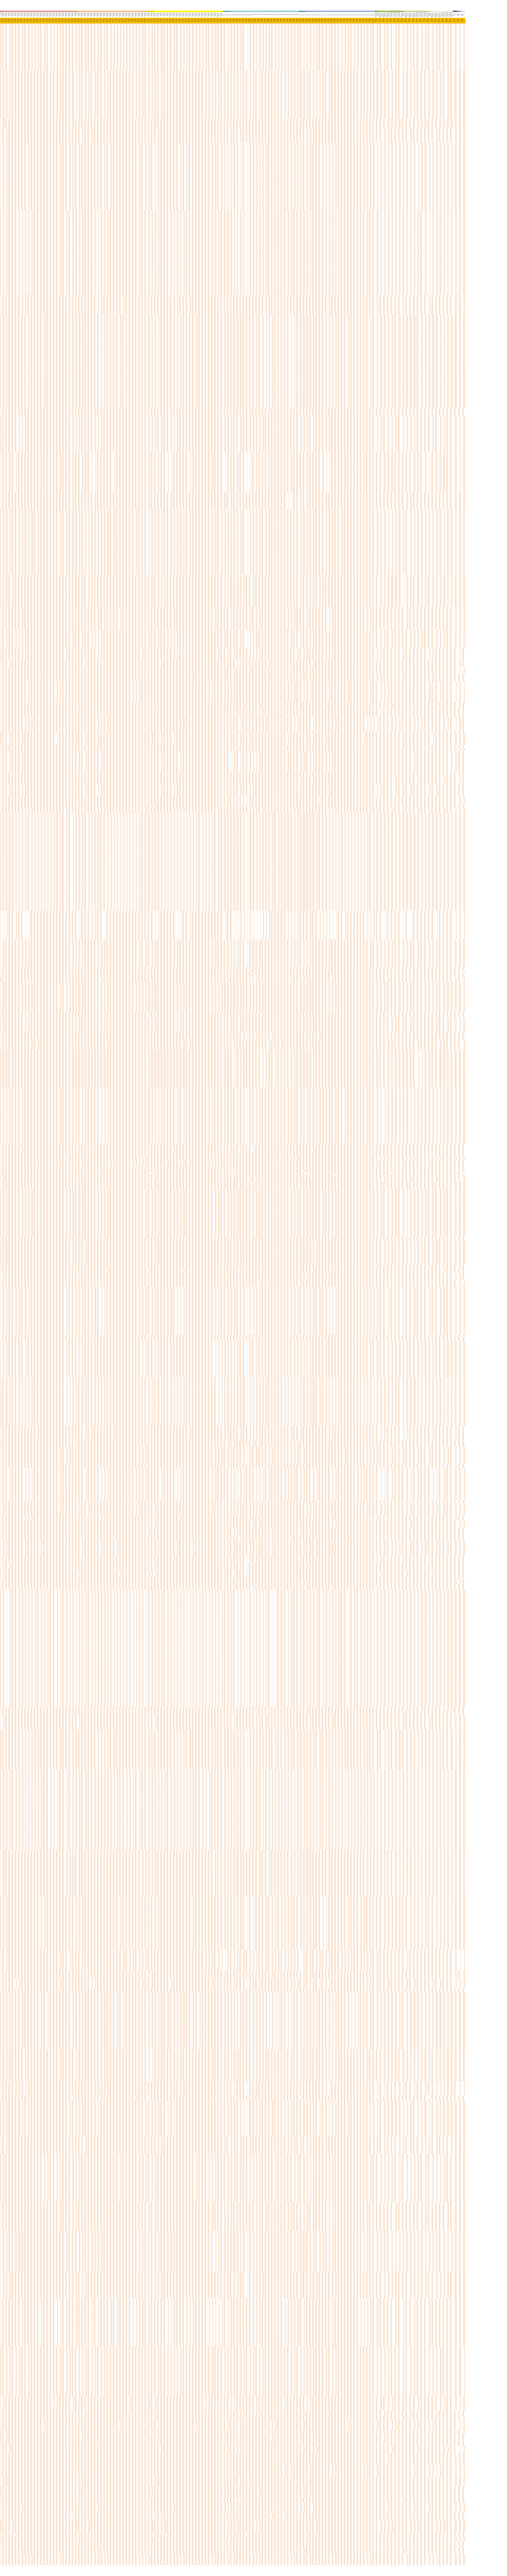



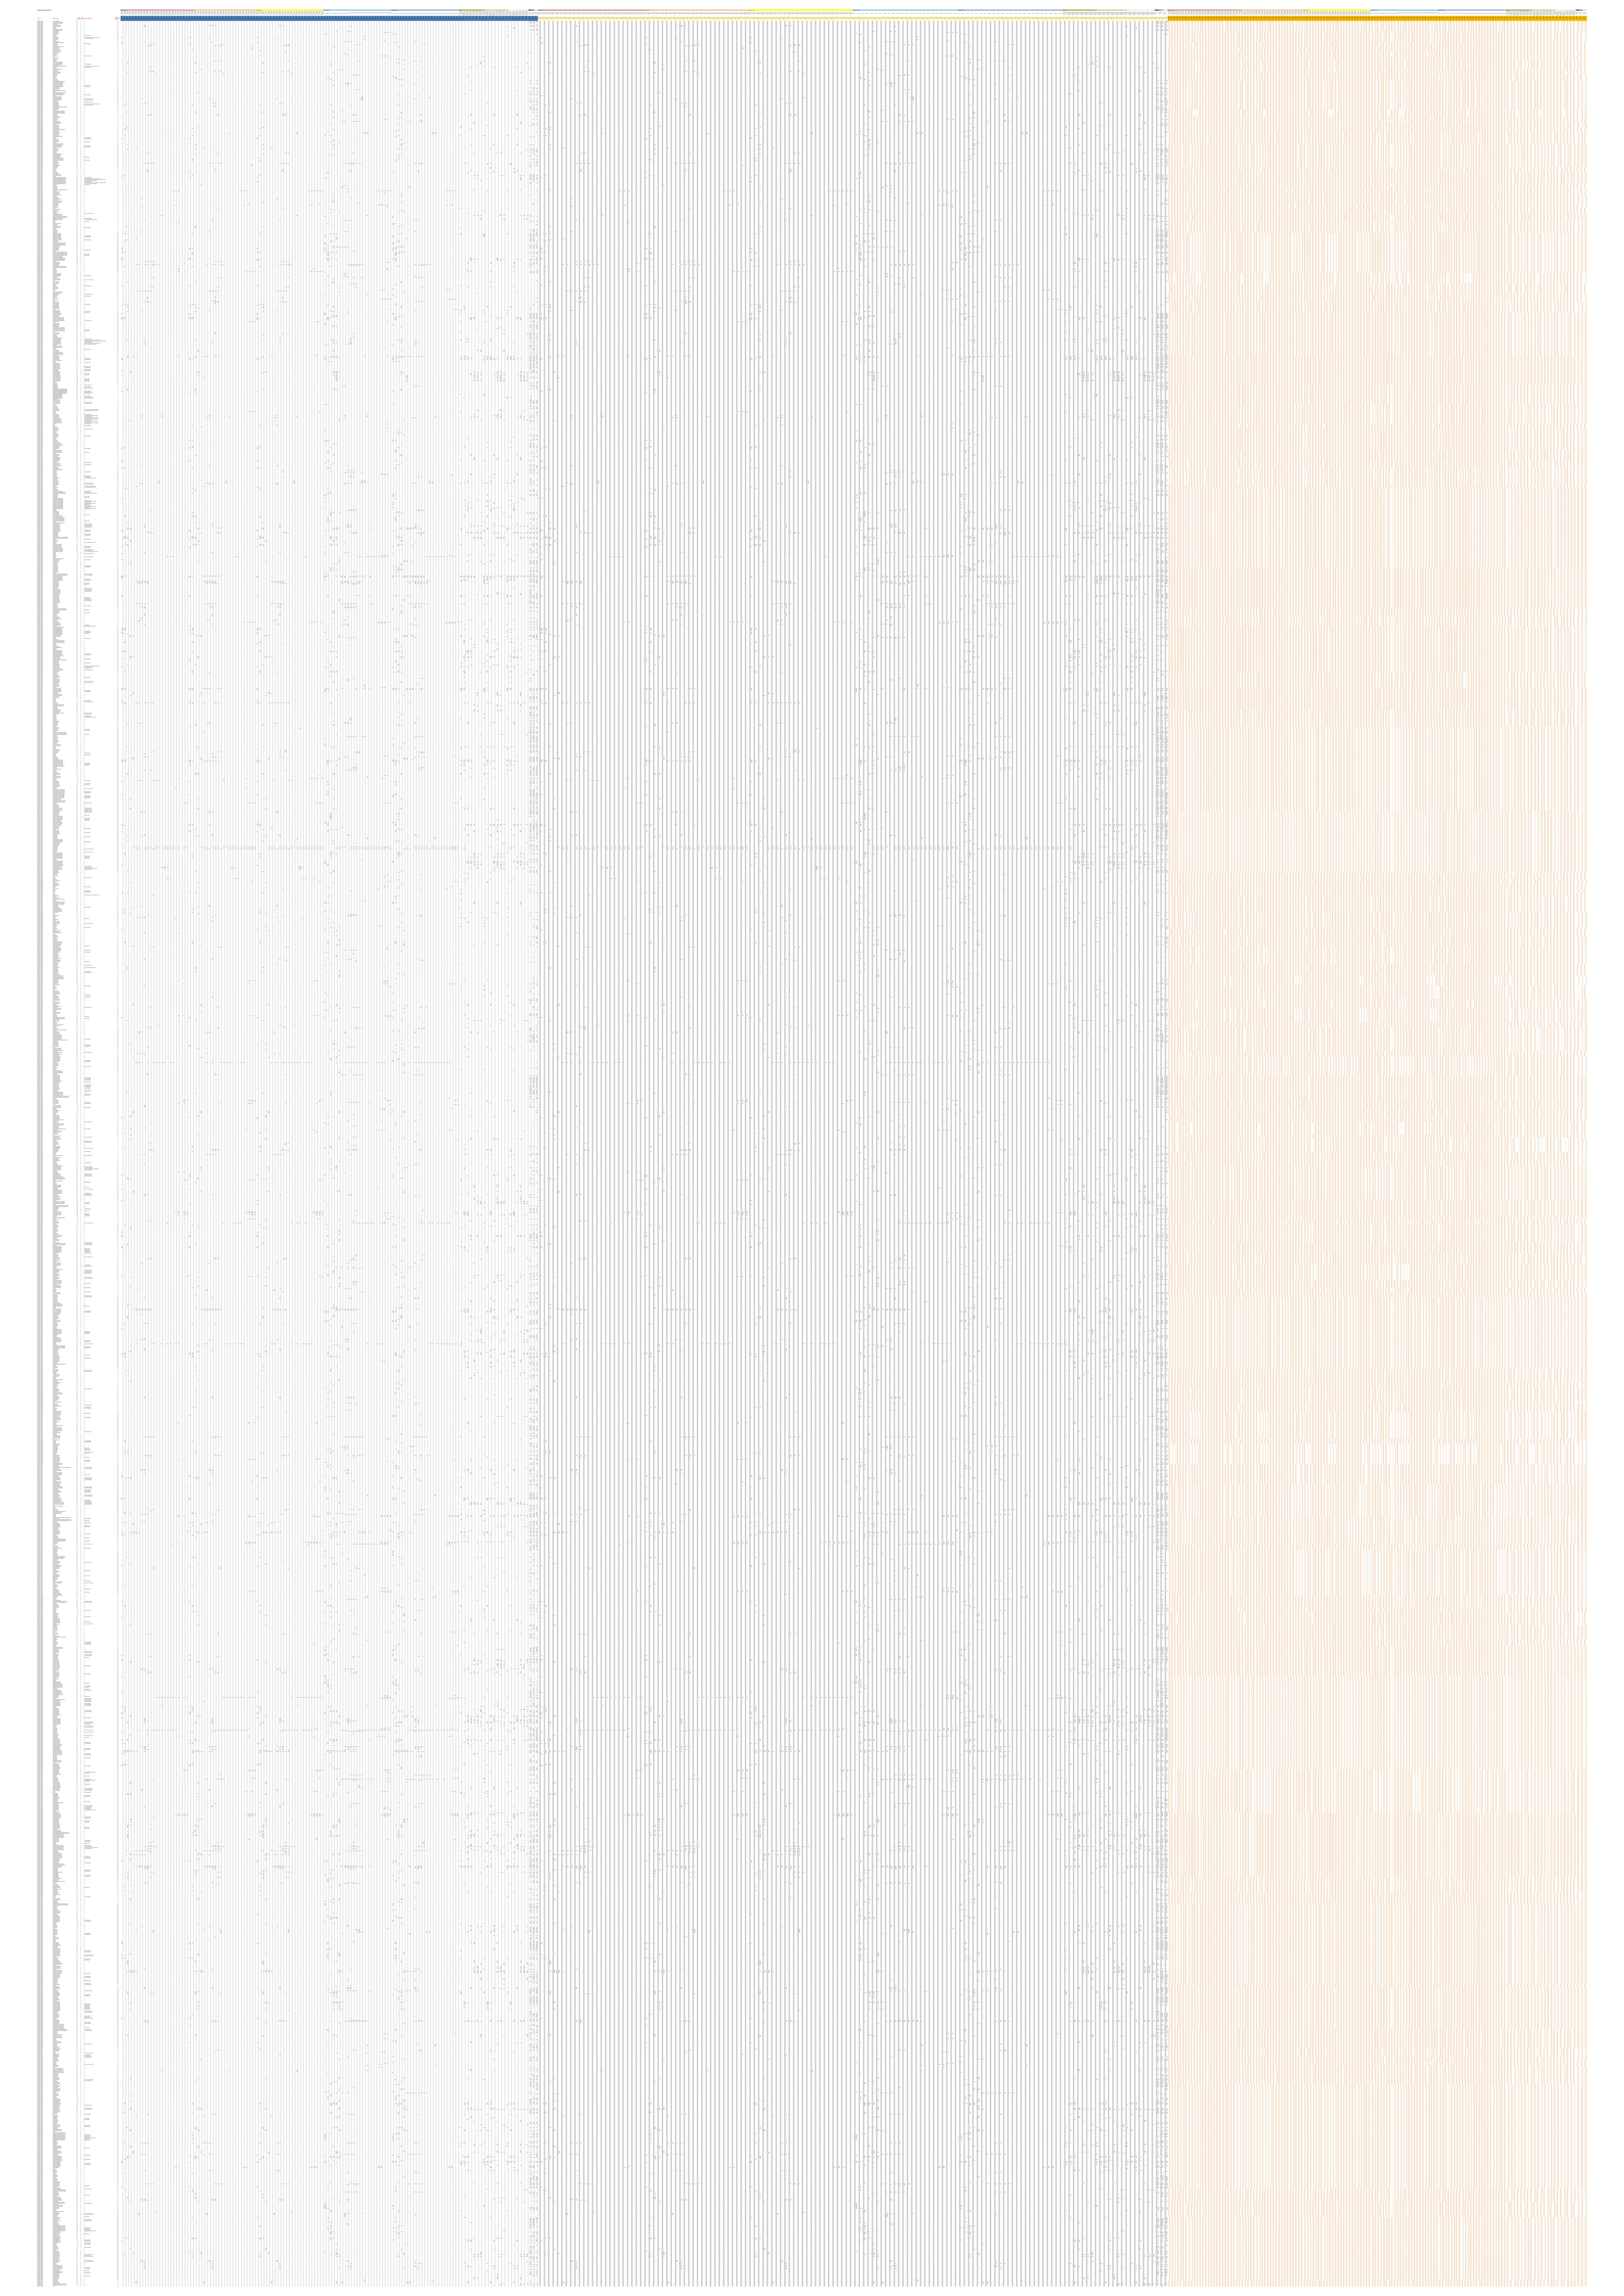



Handwritten text on a grid background, appearing to be a list or index of entries. The text is dense and spans most of the page.

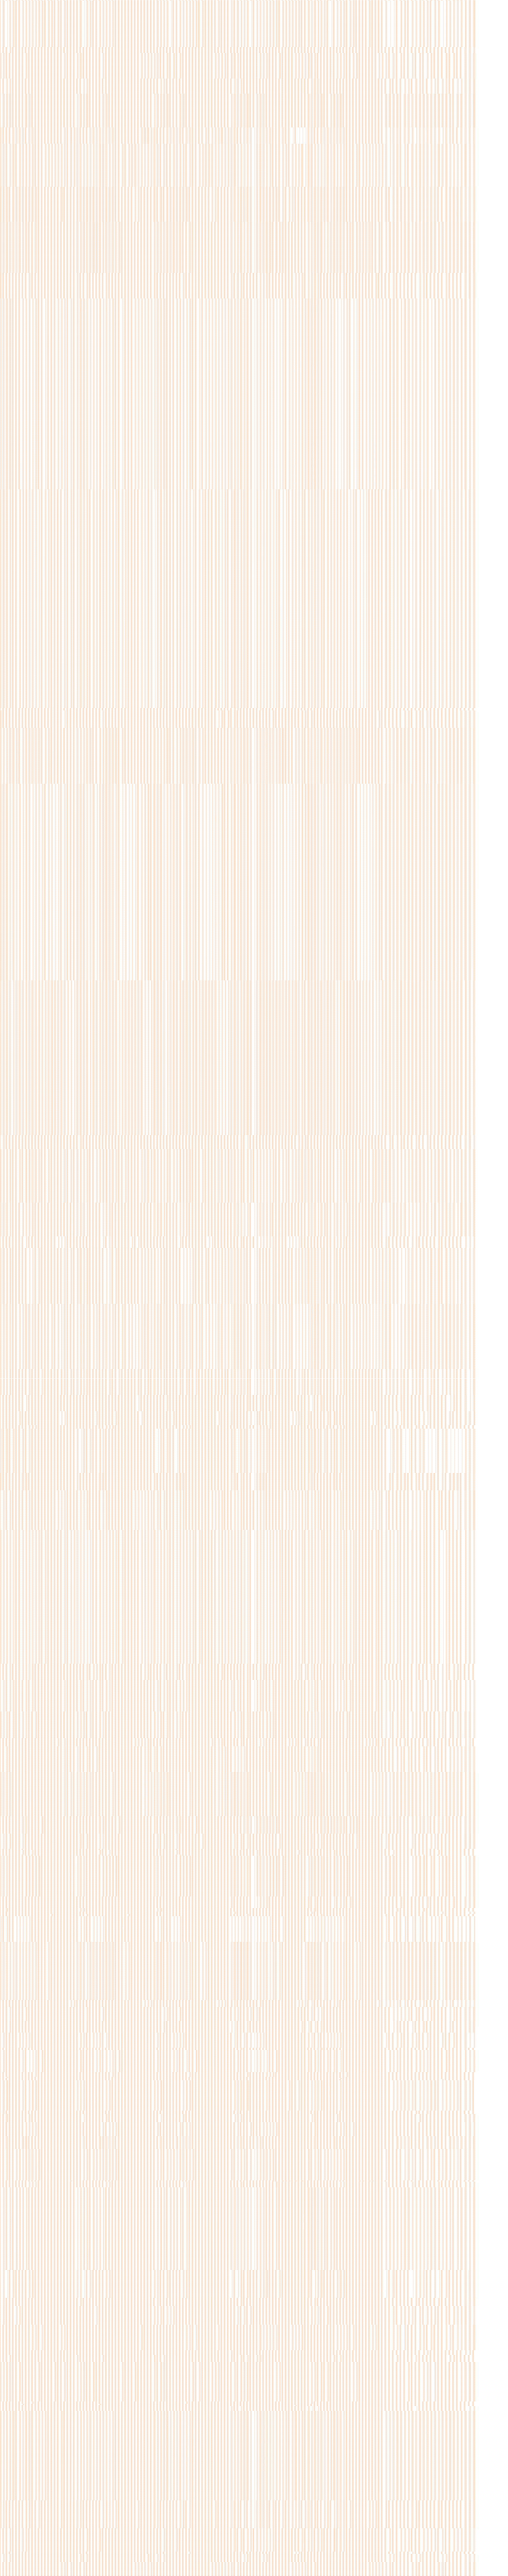



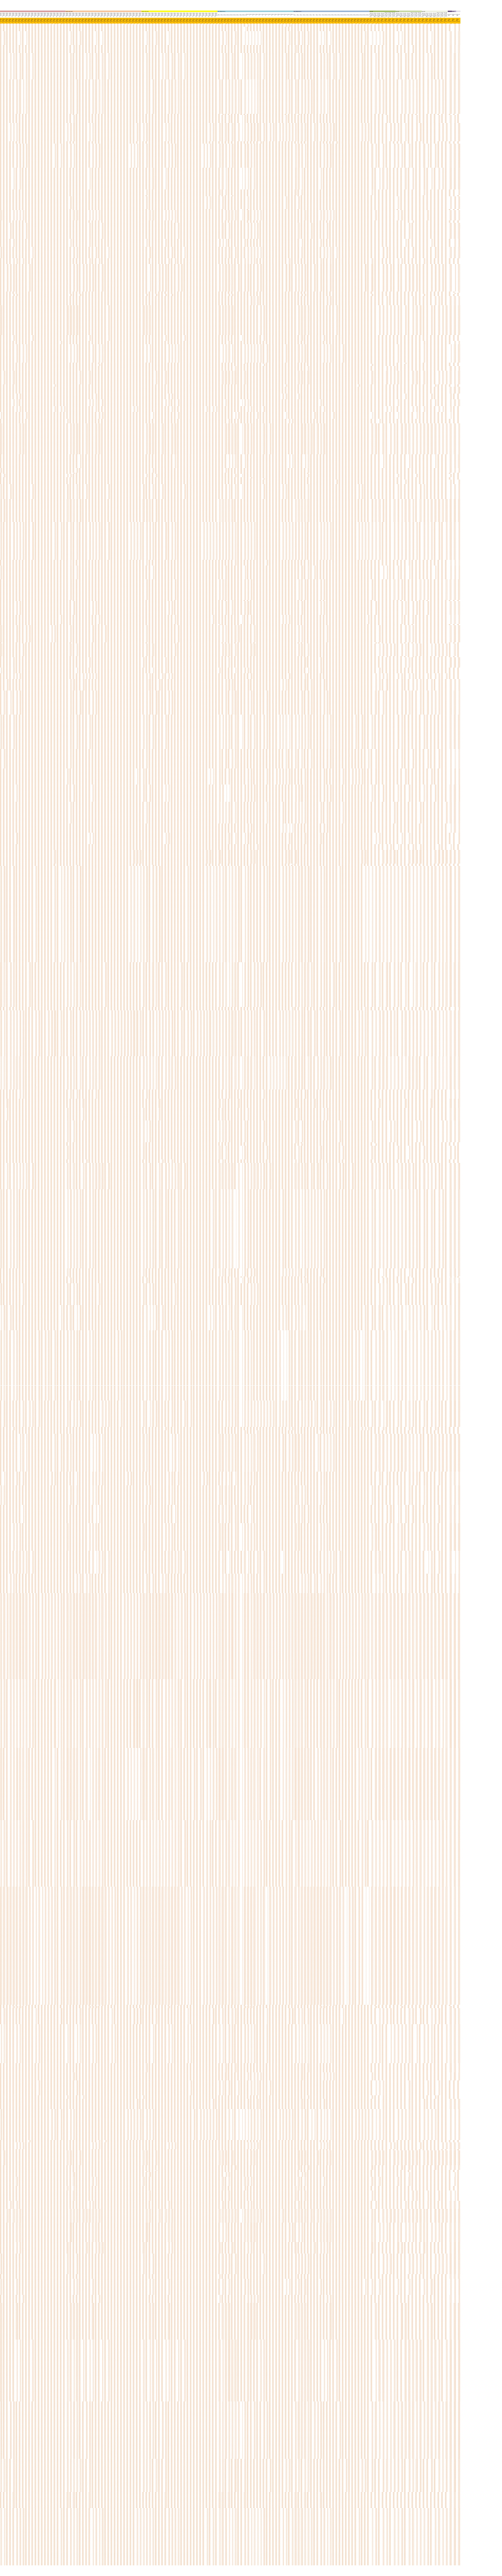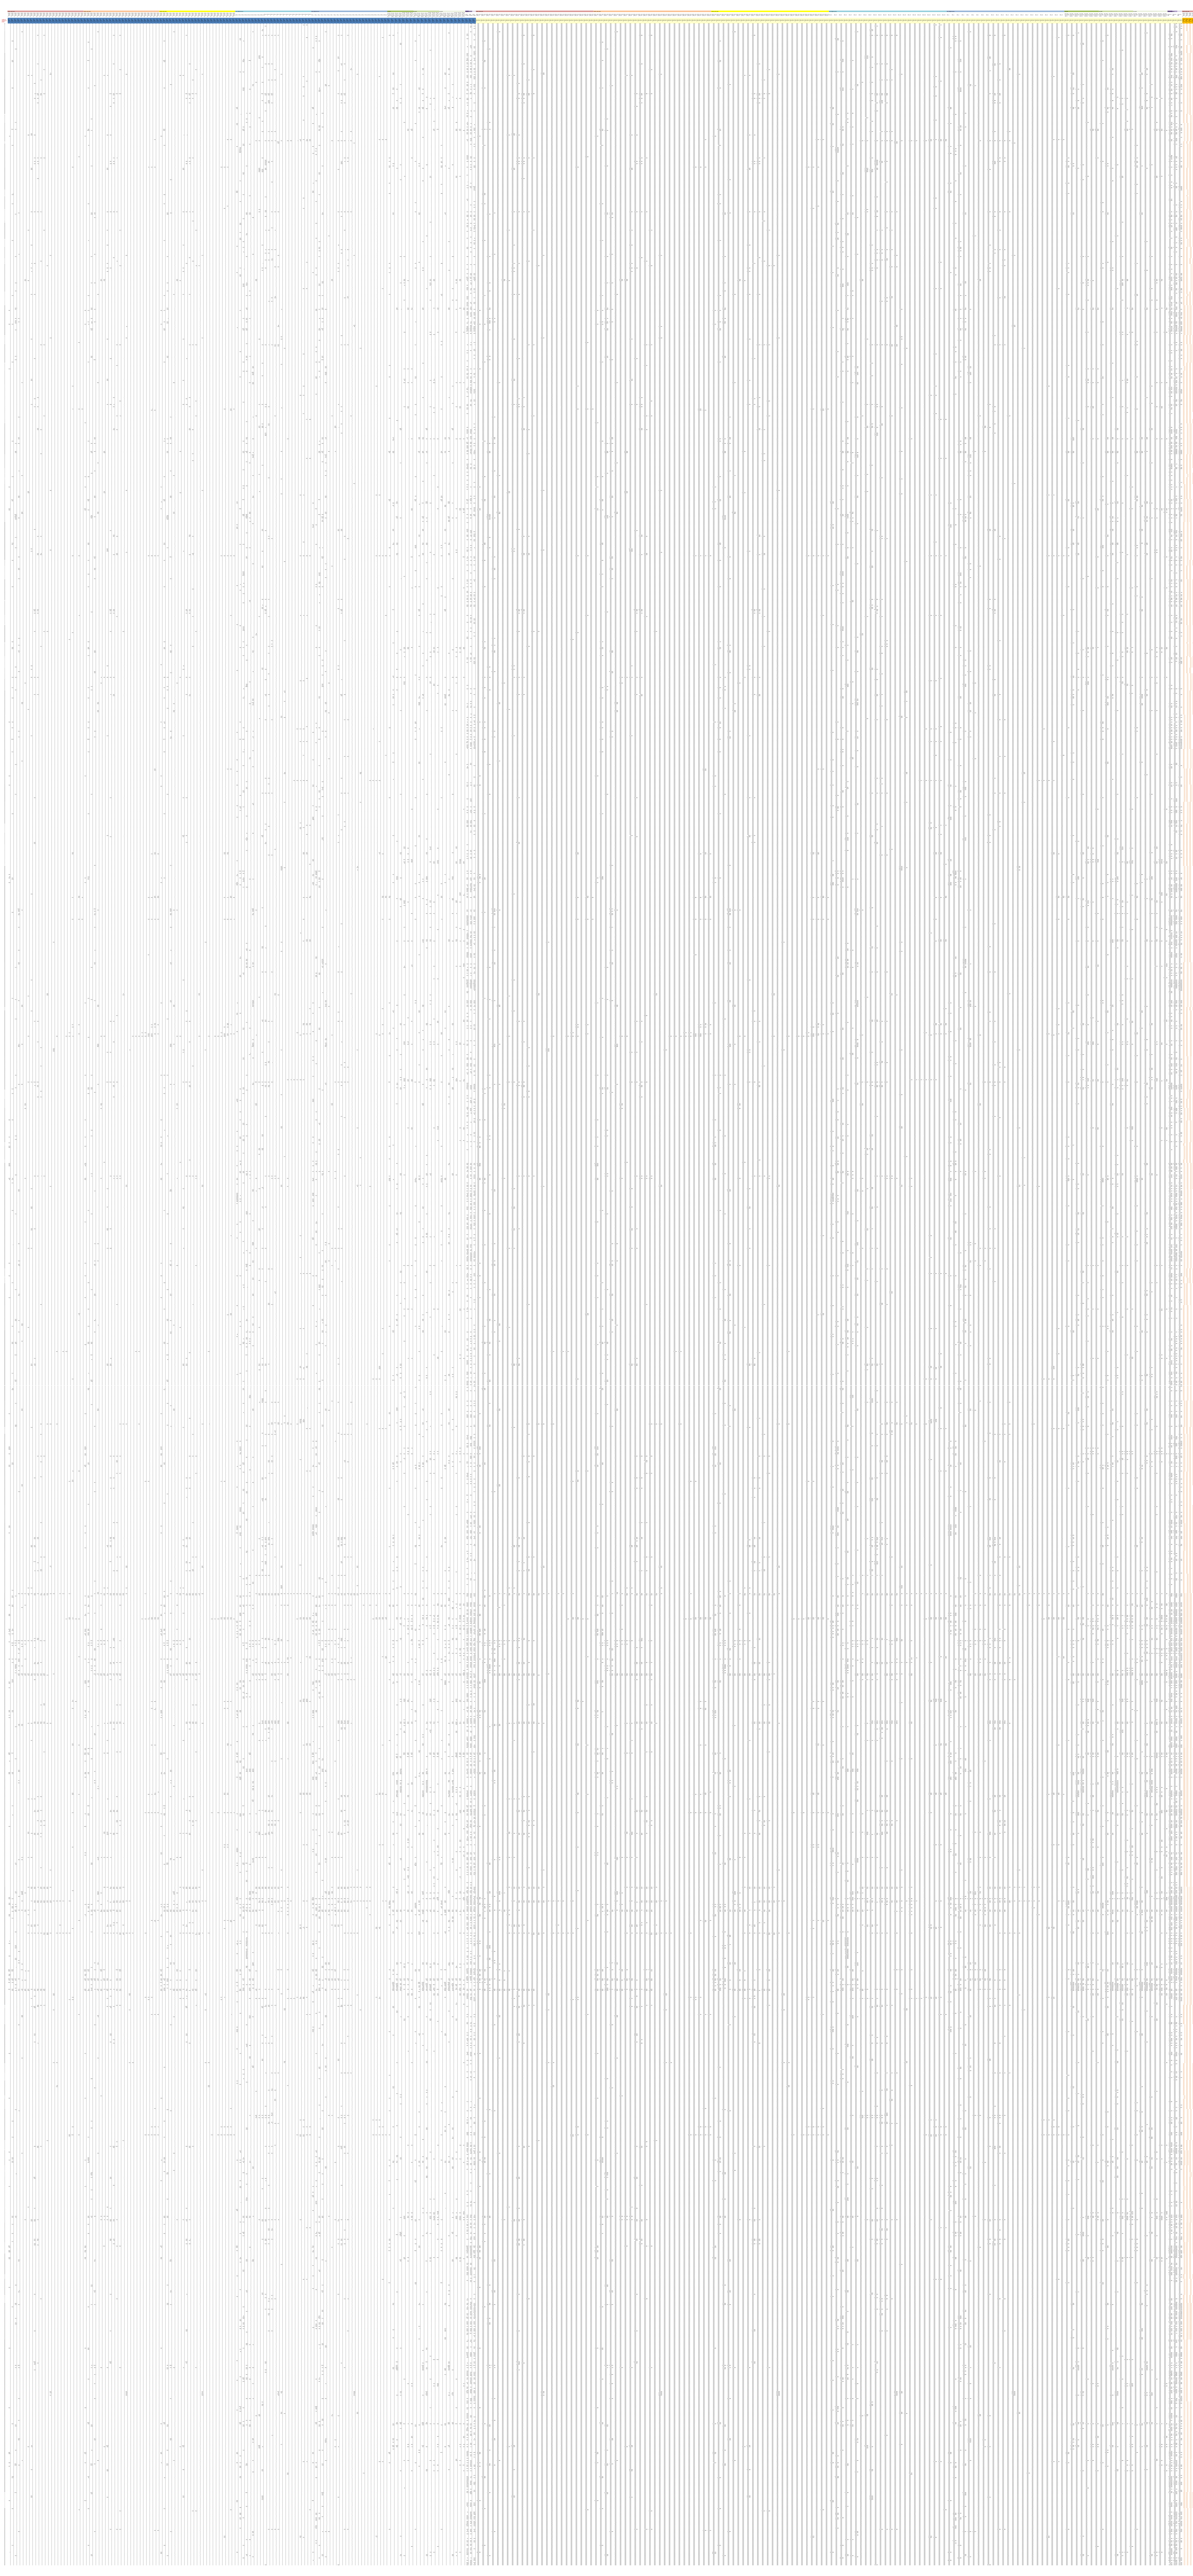



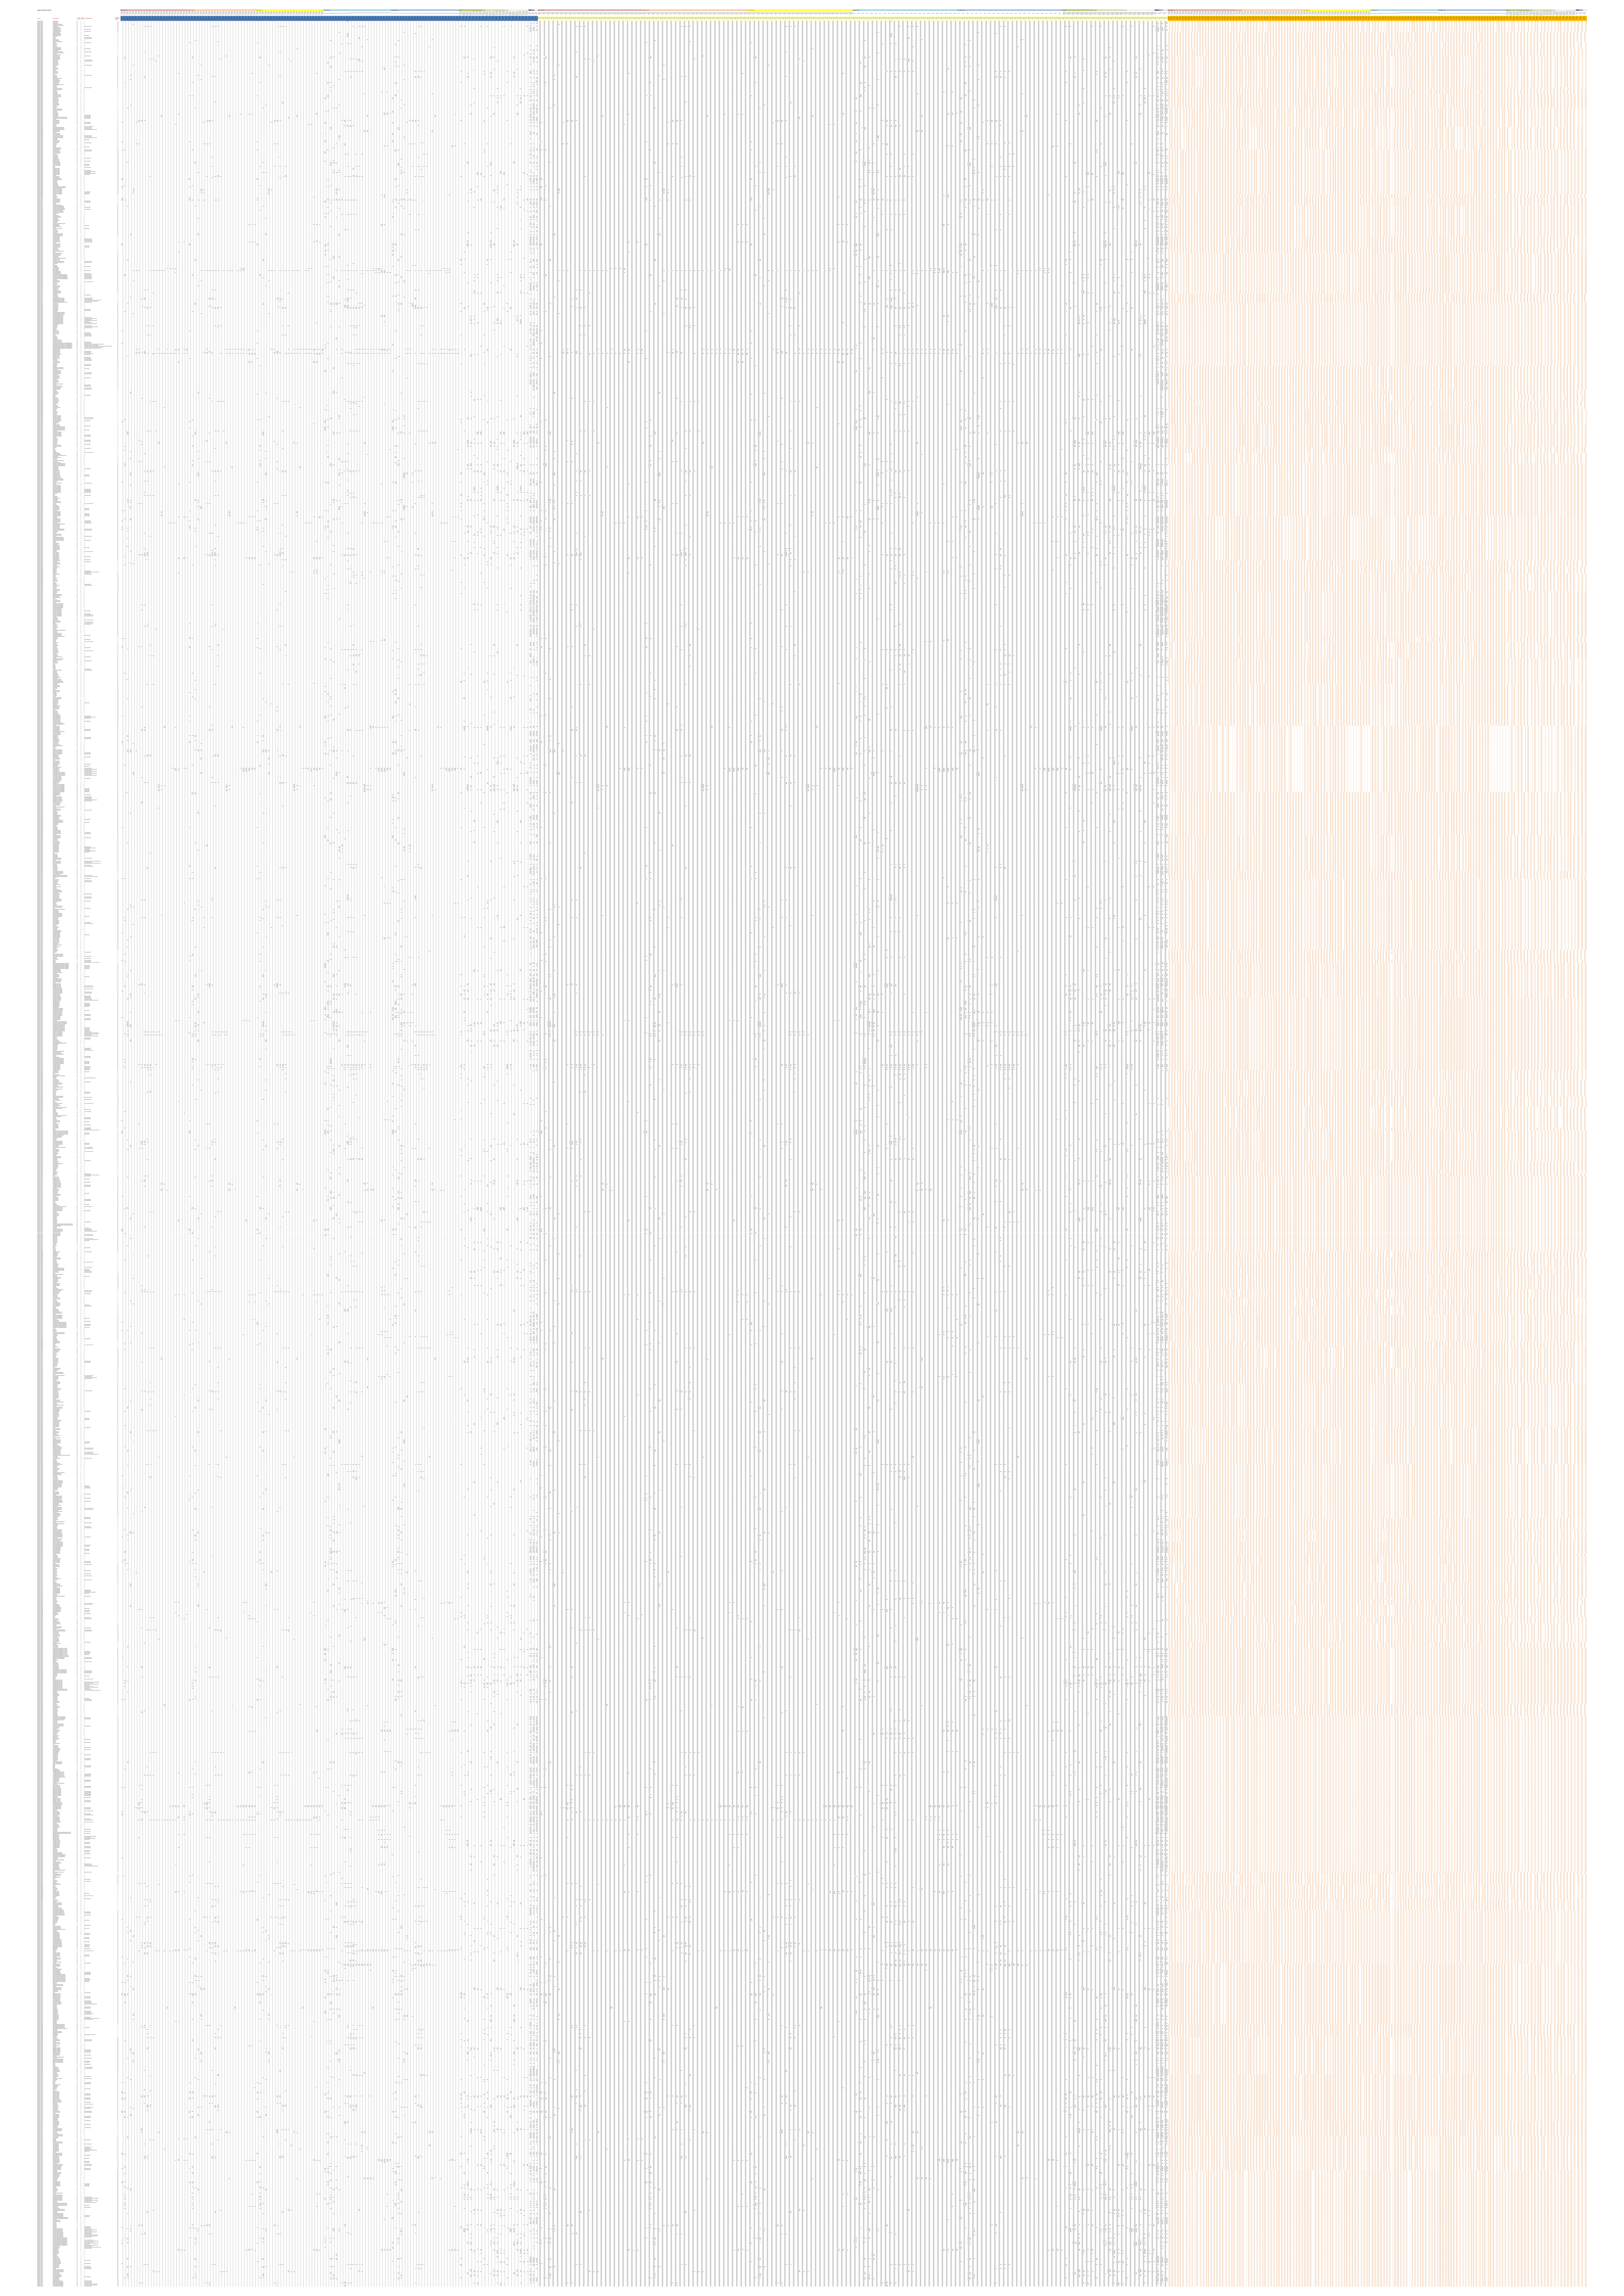



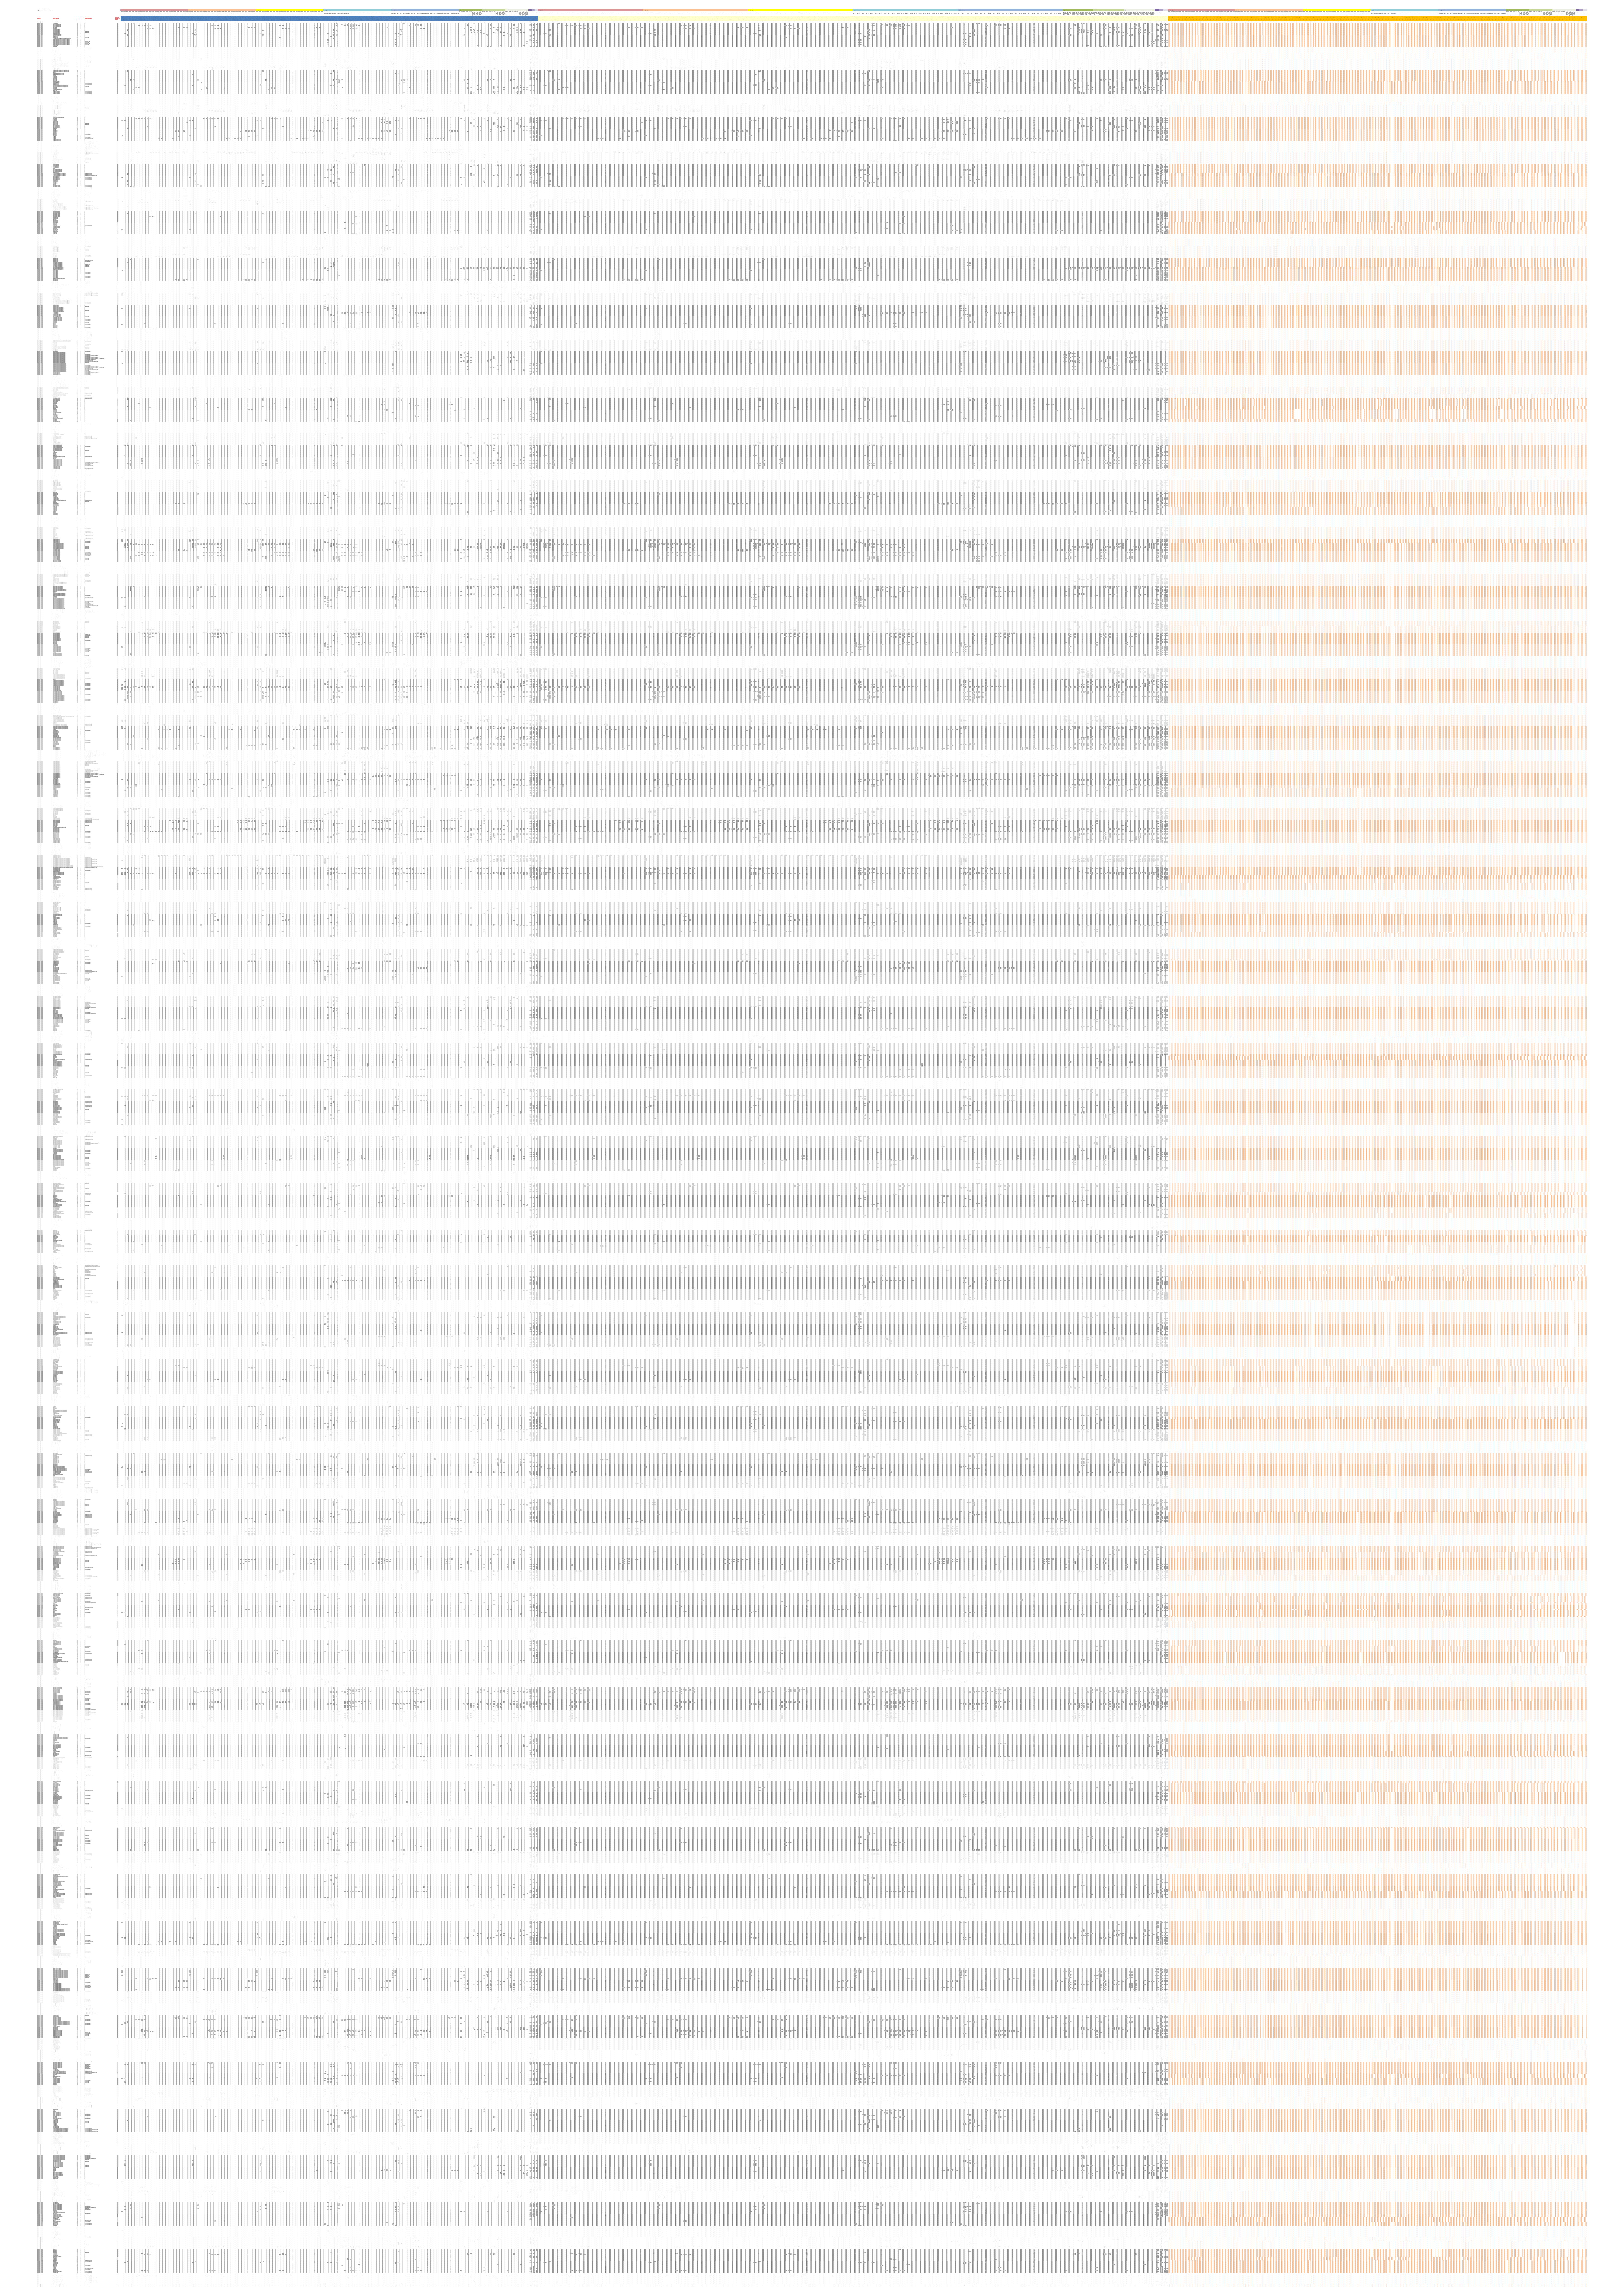



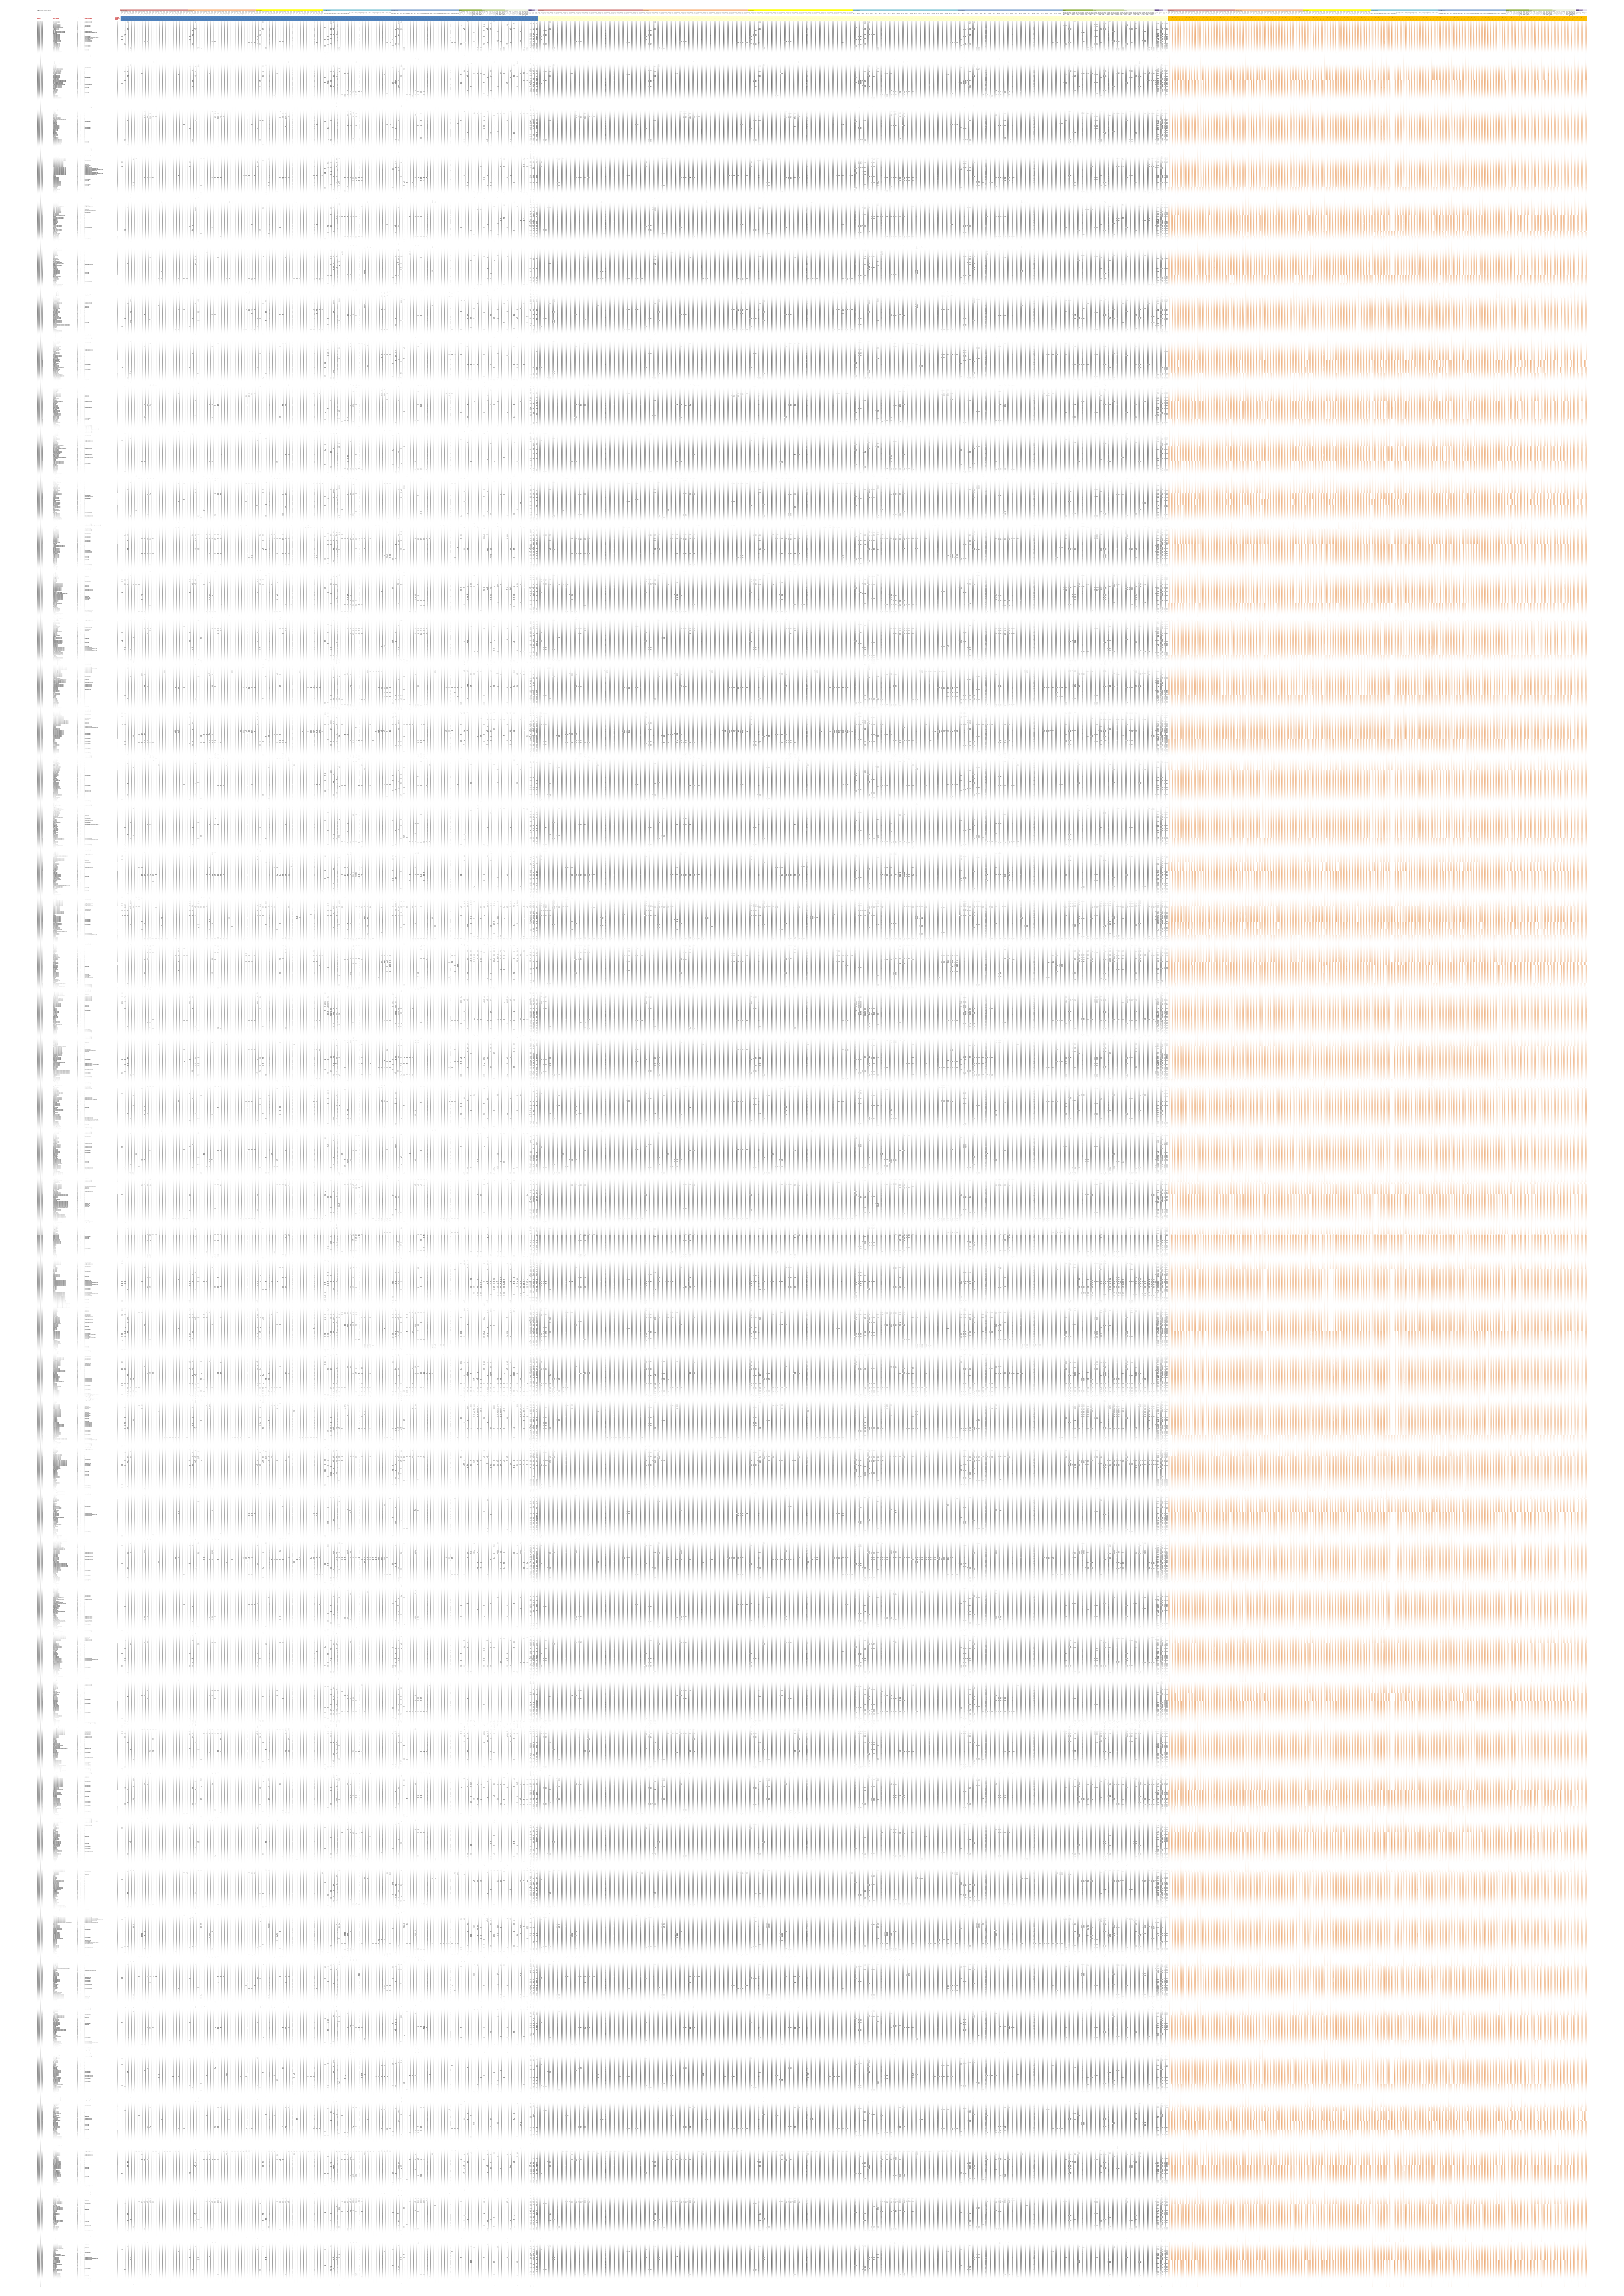



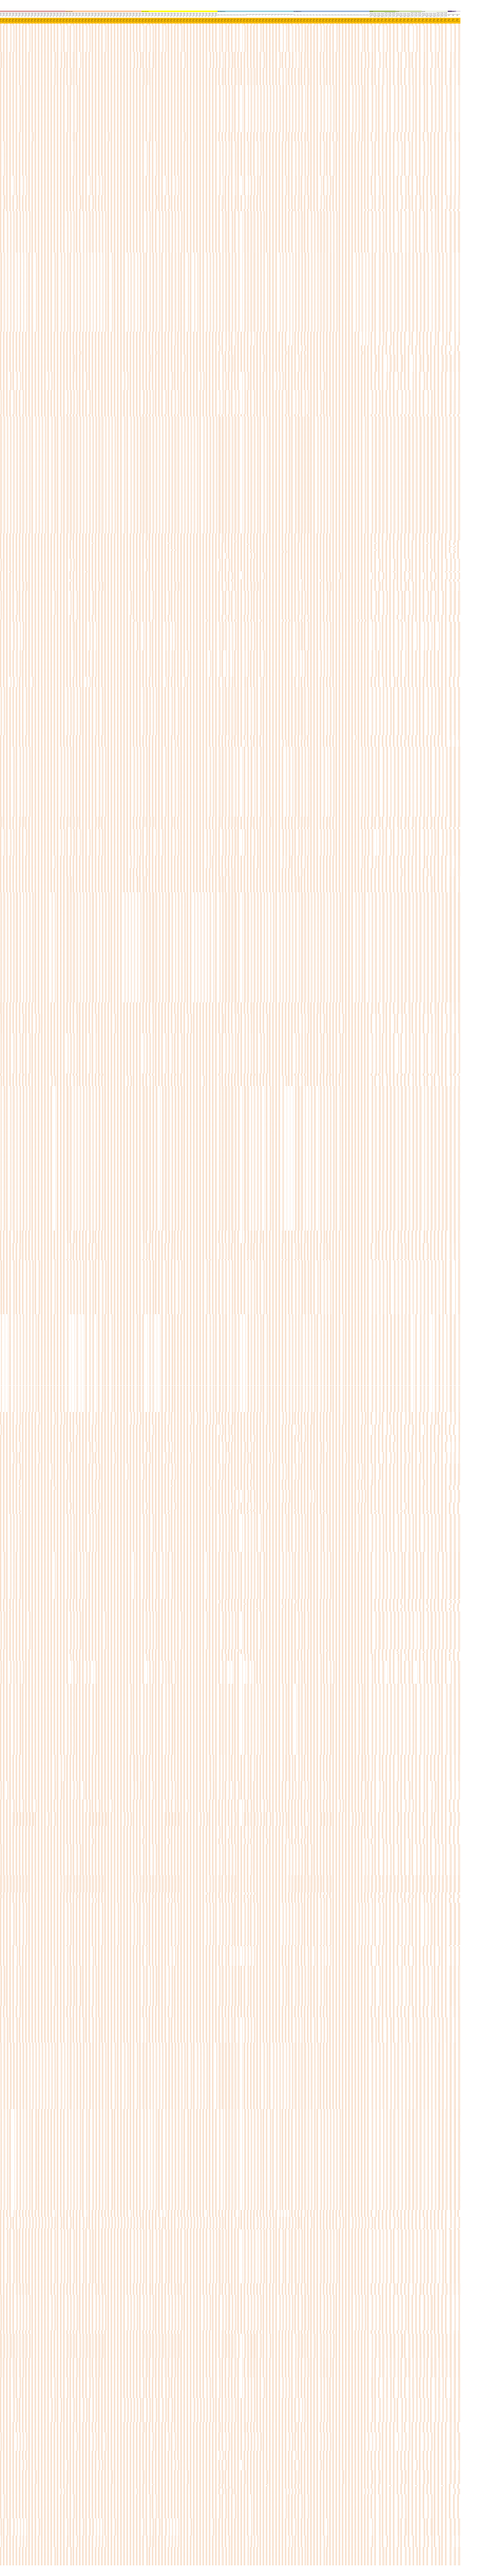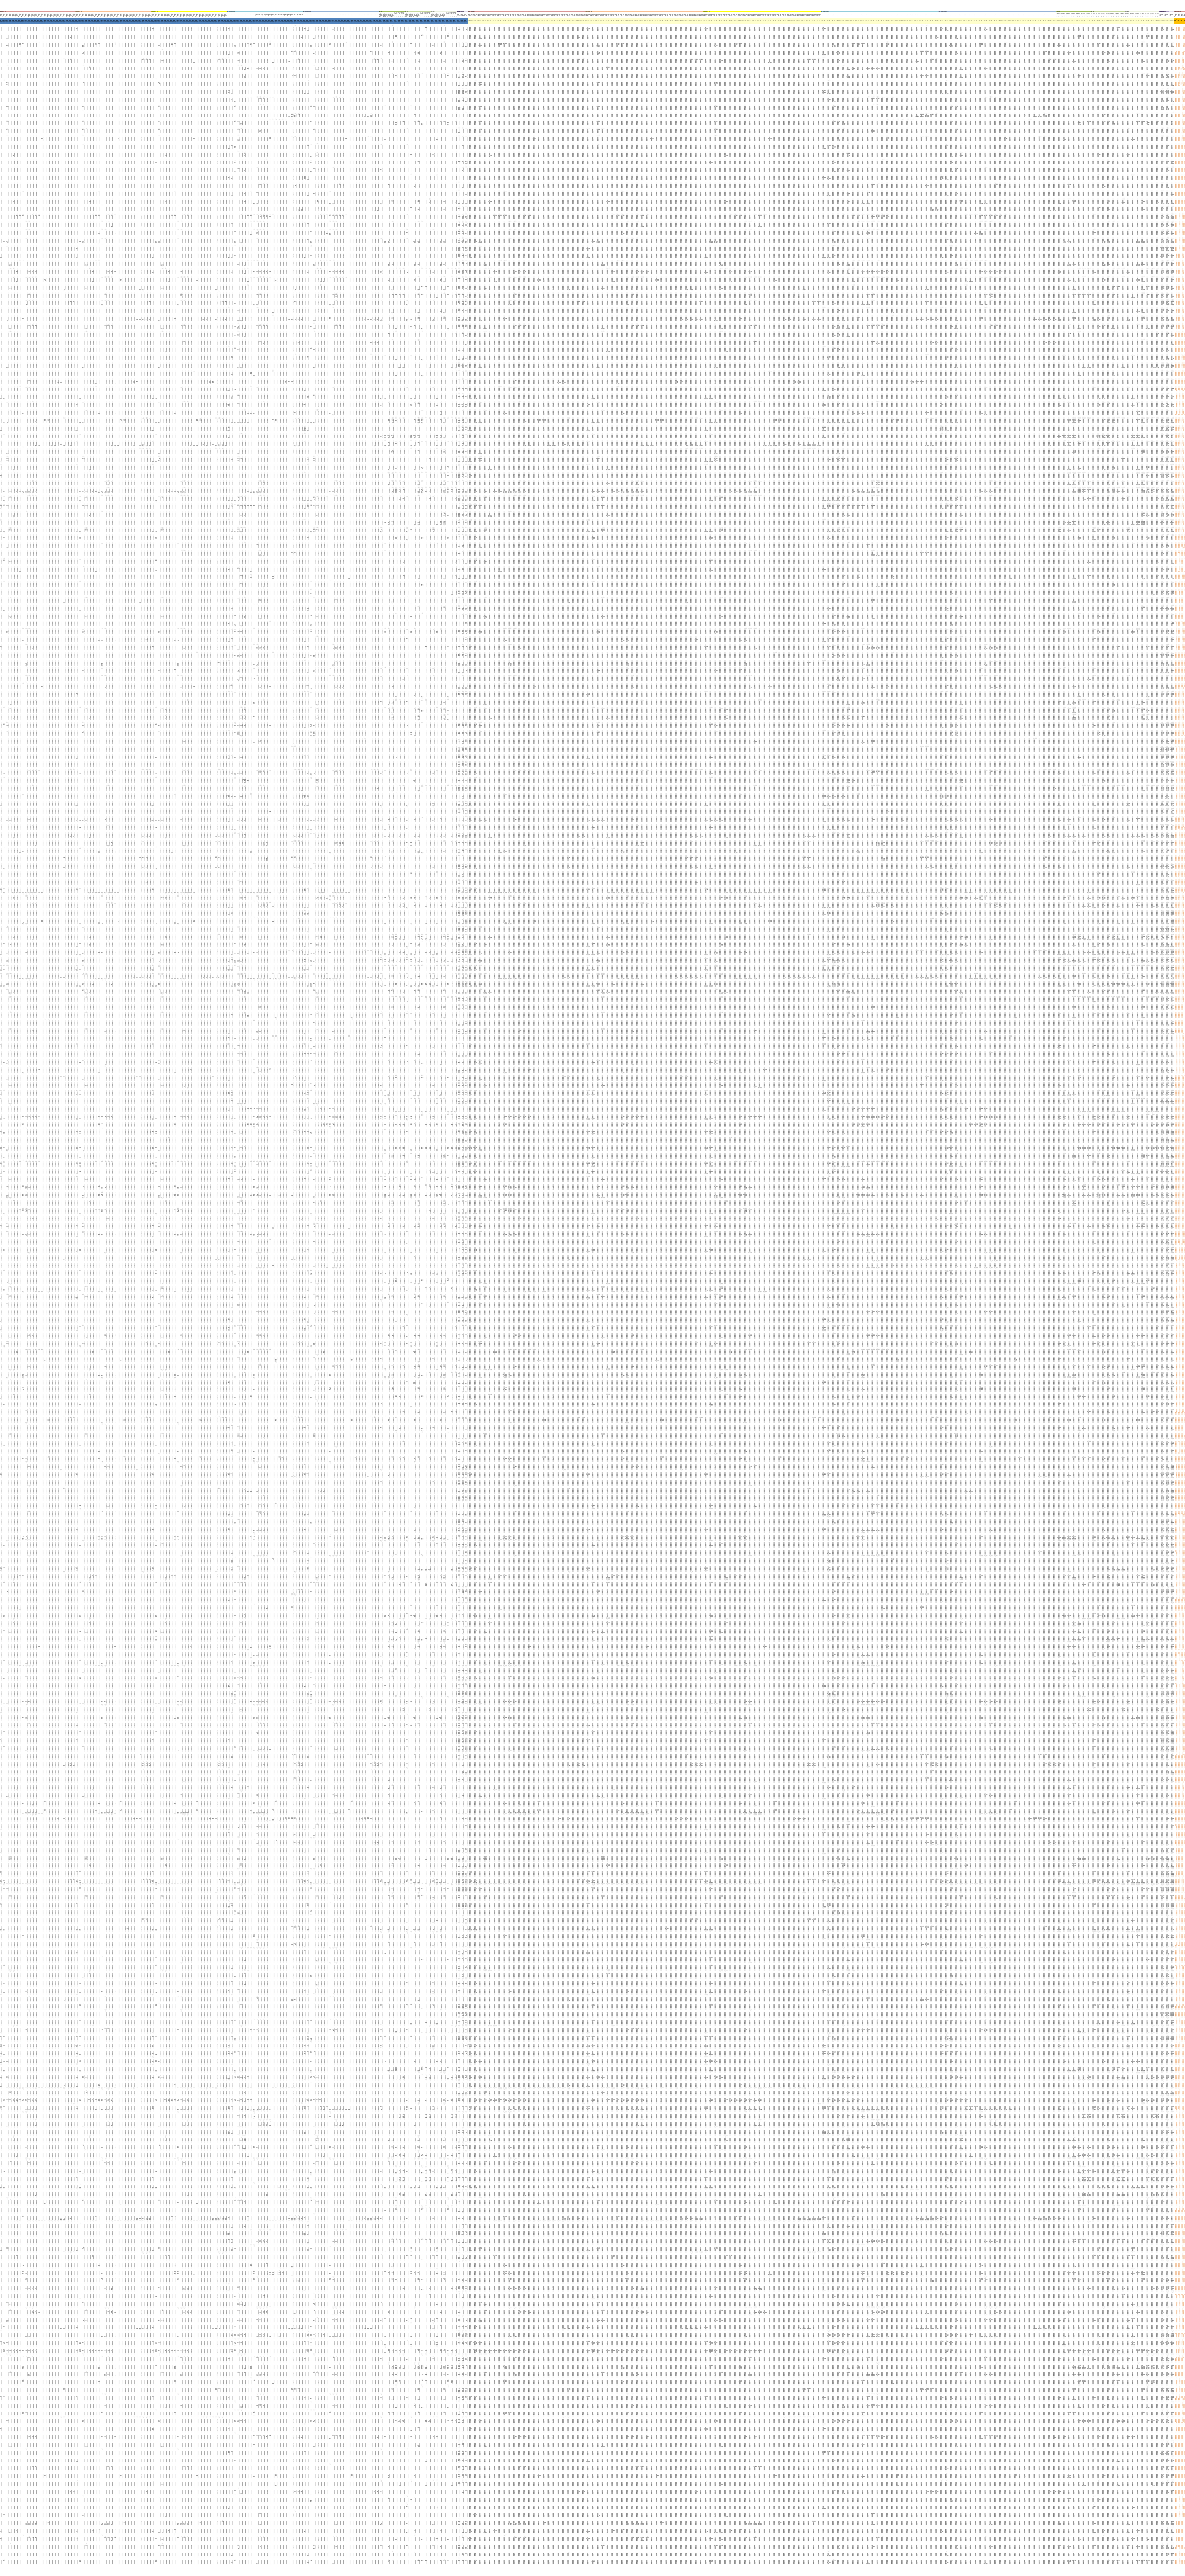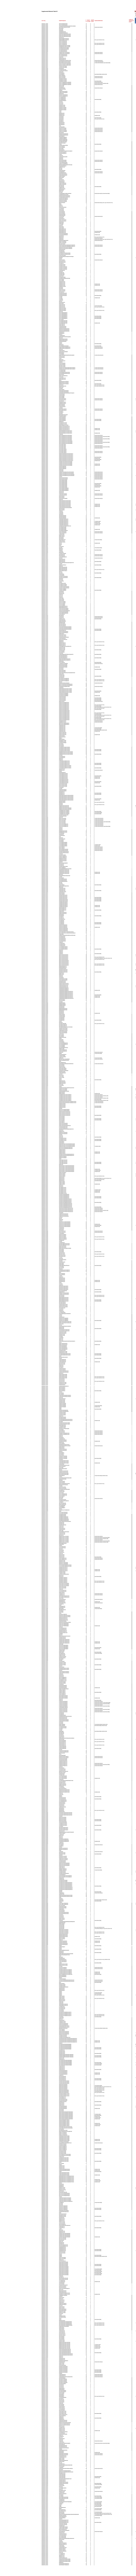



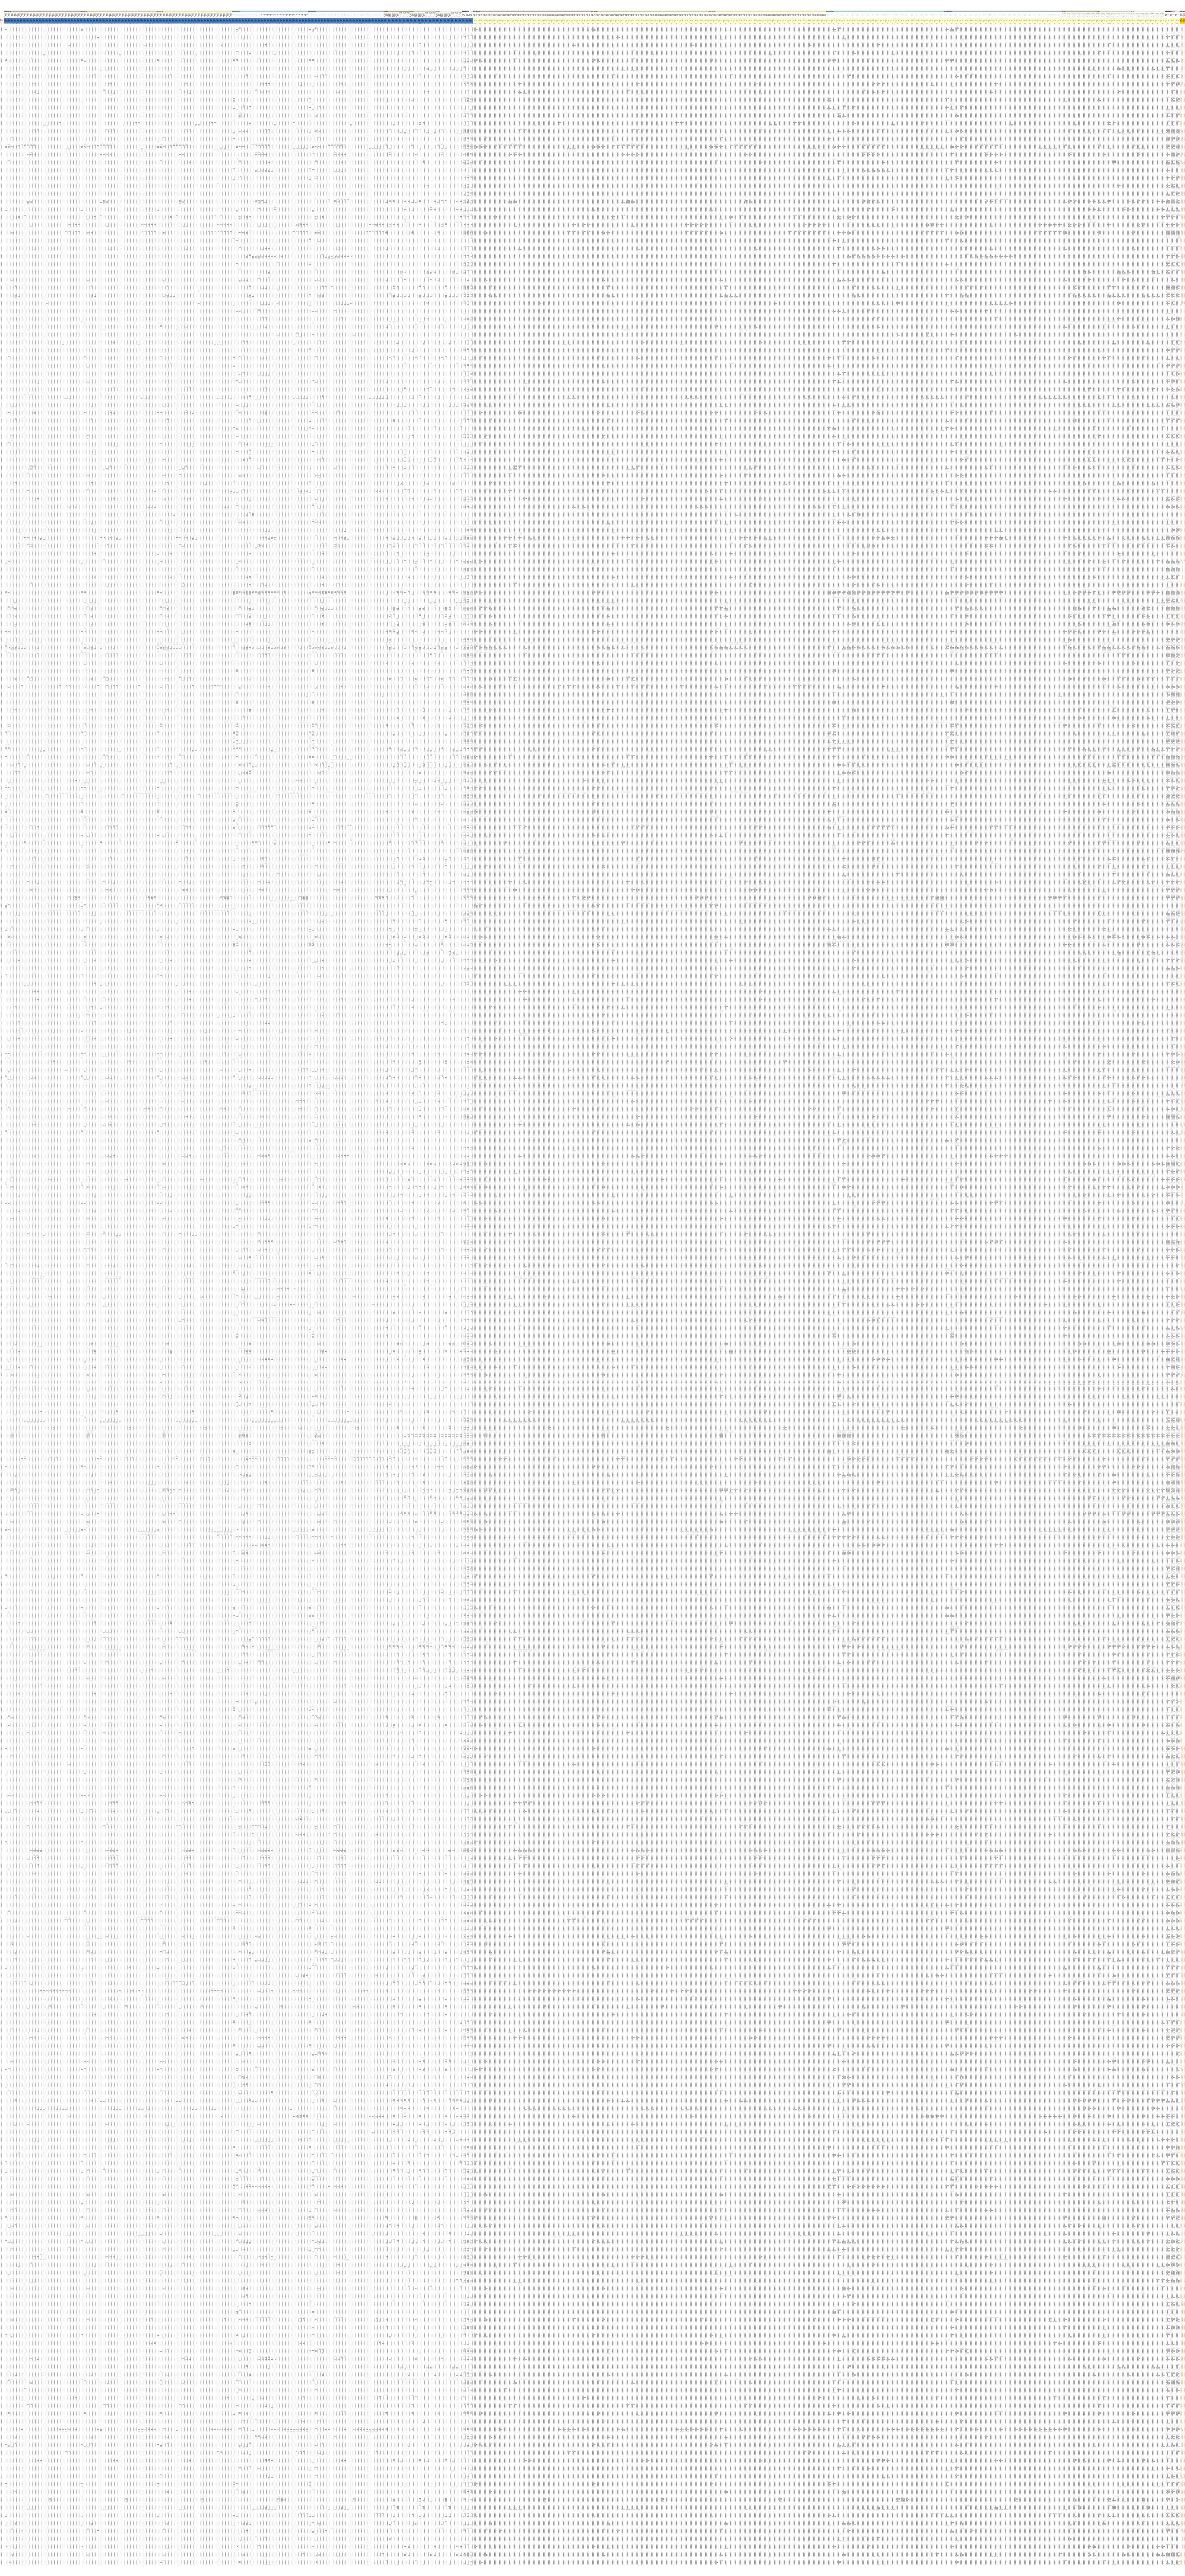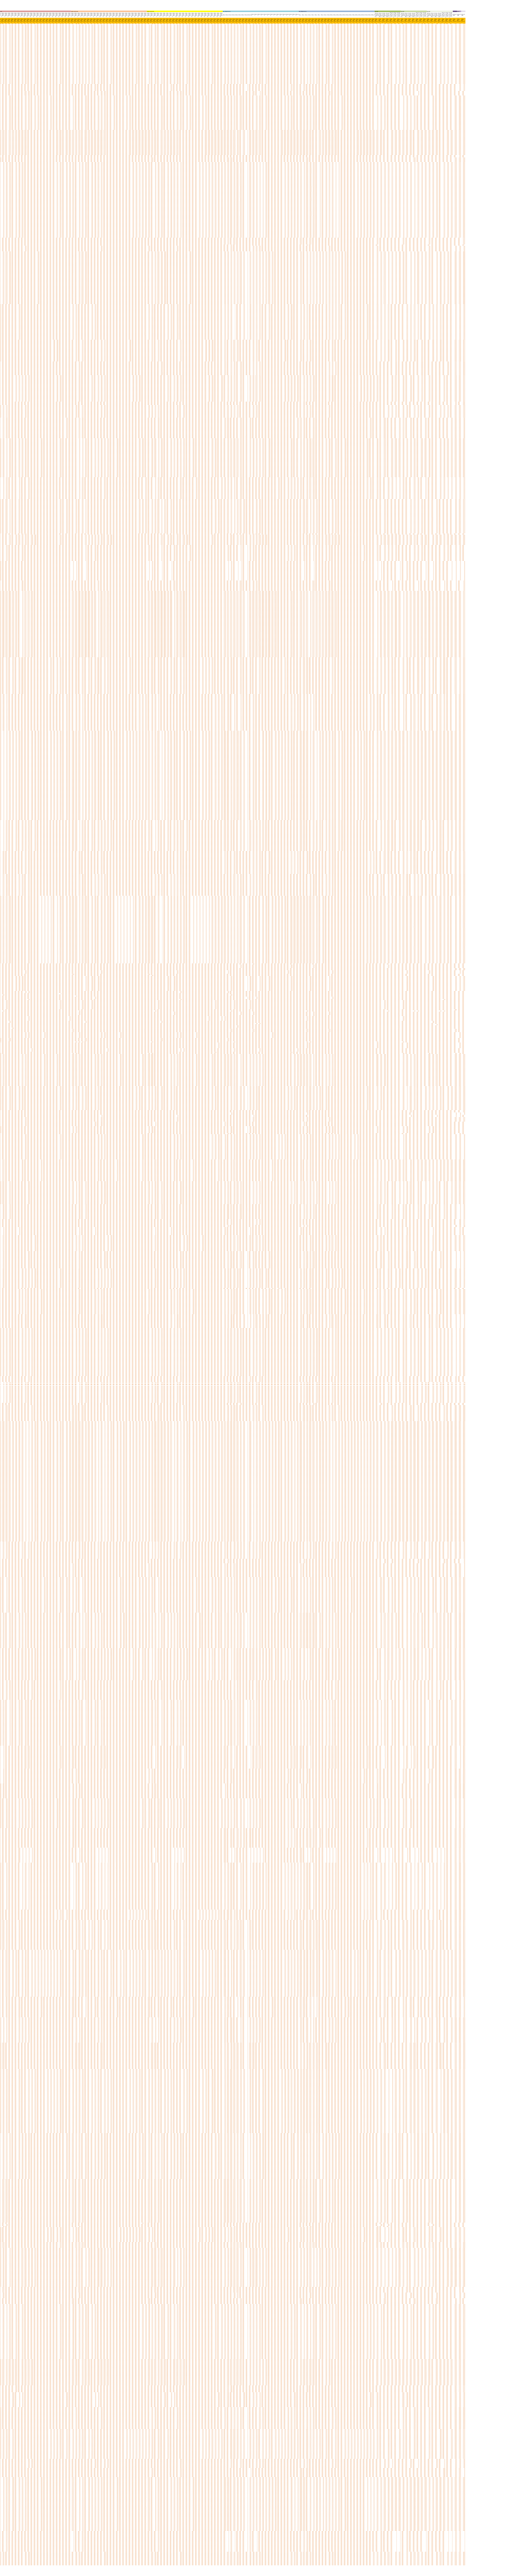



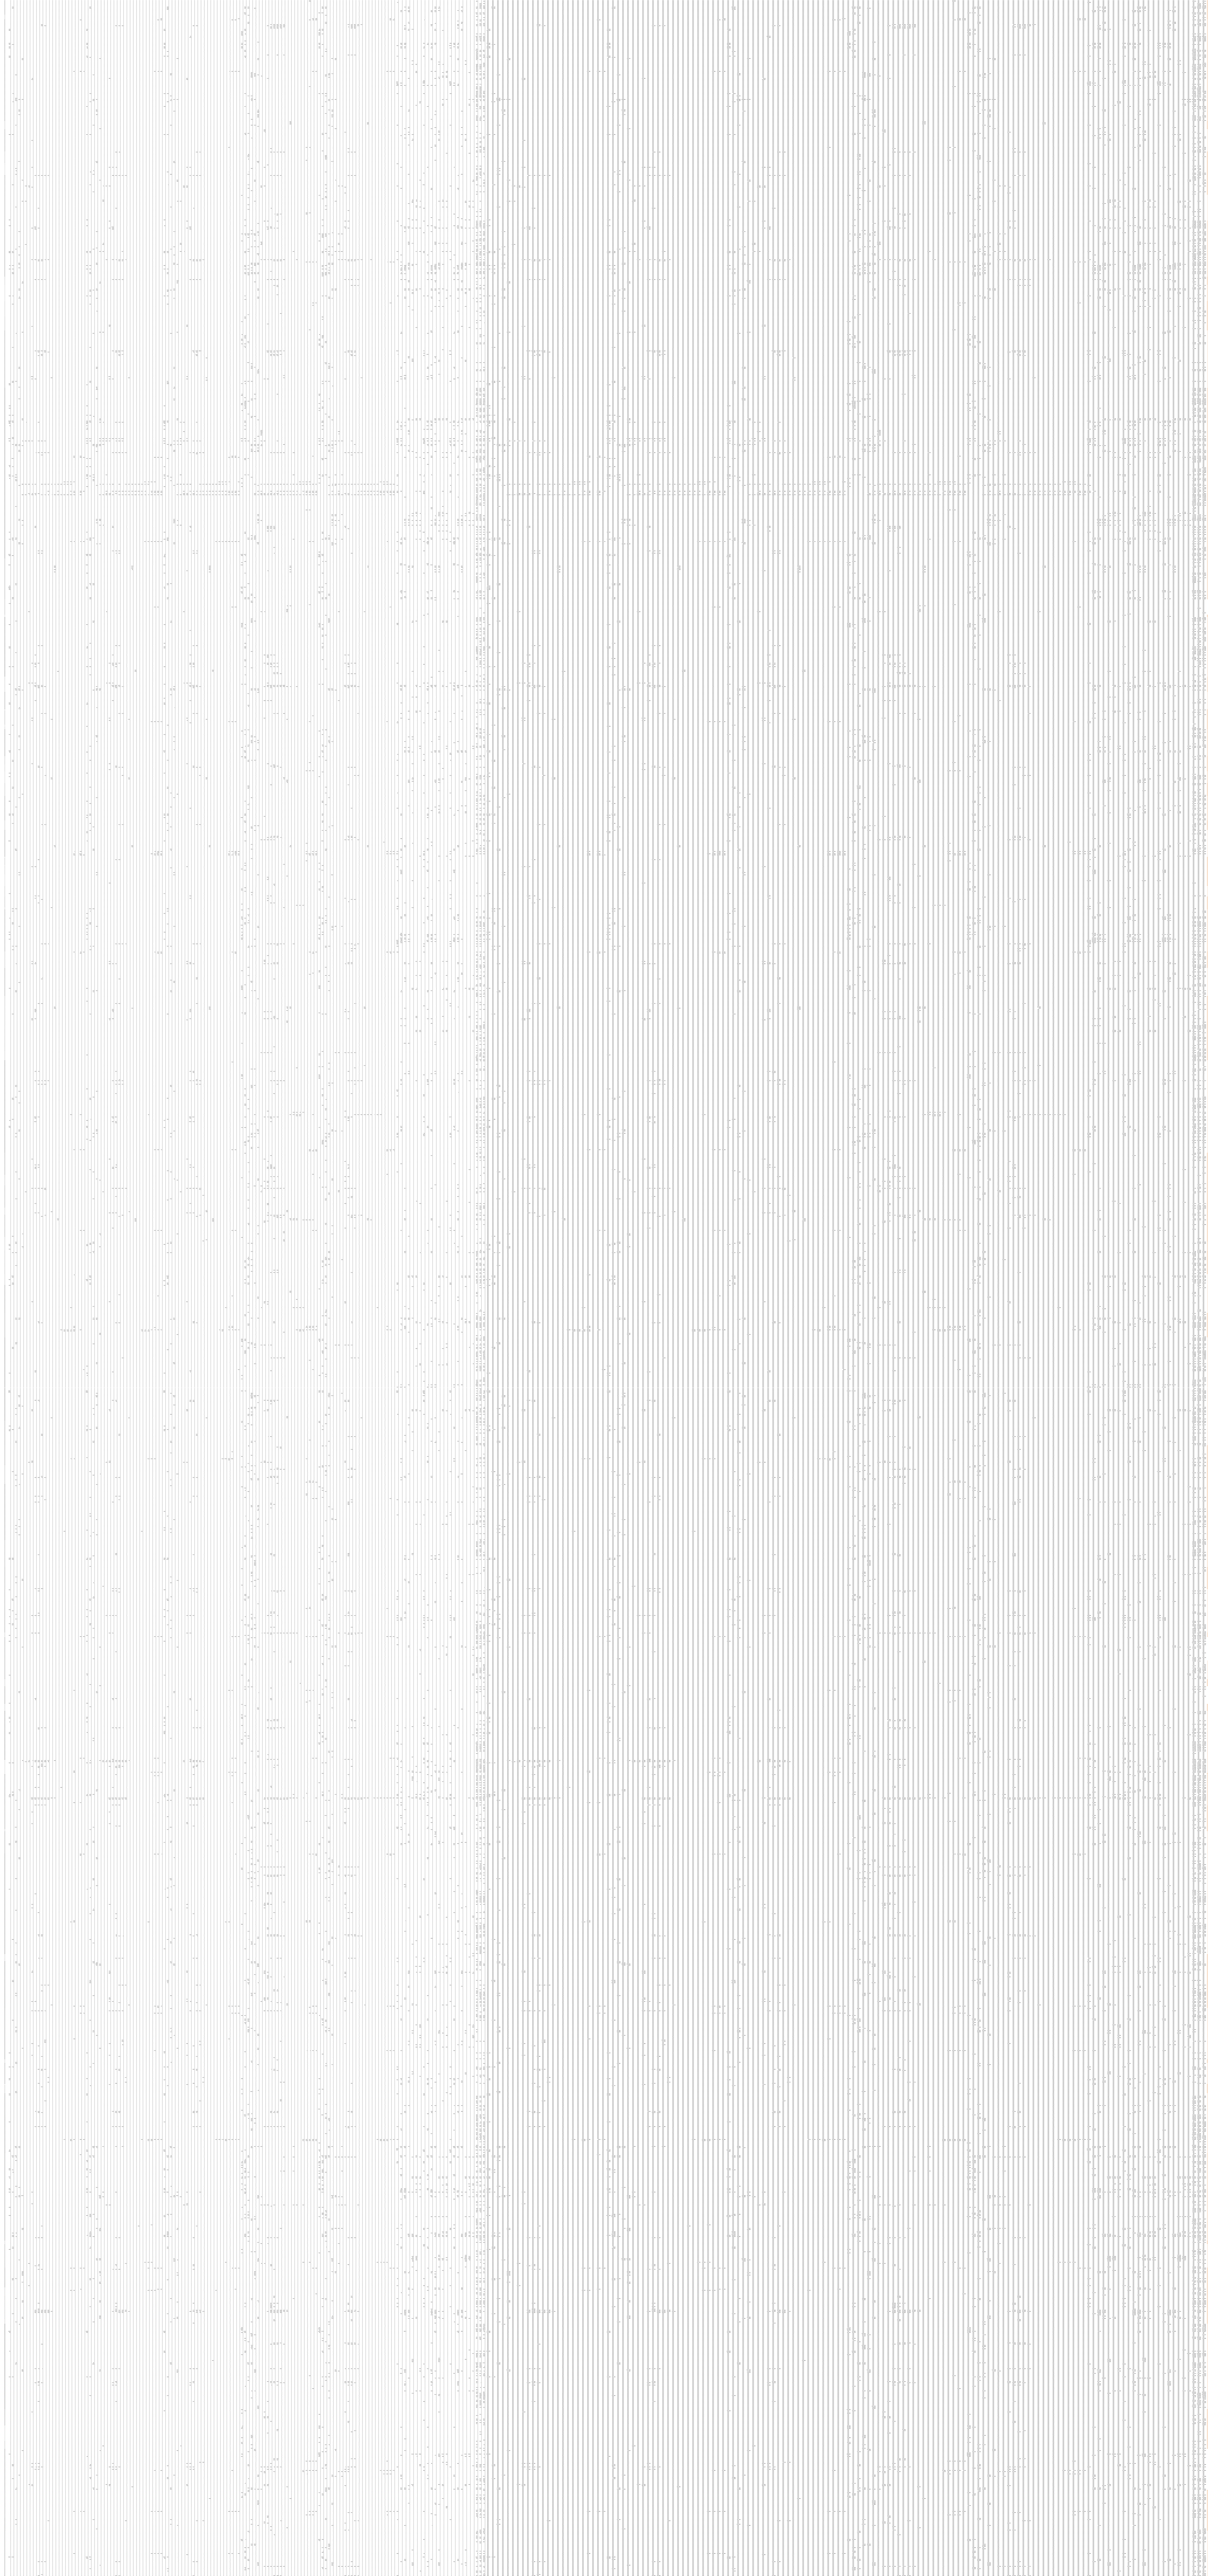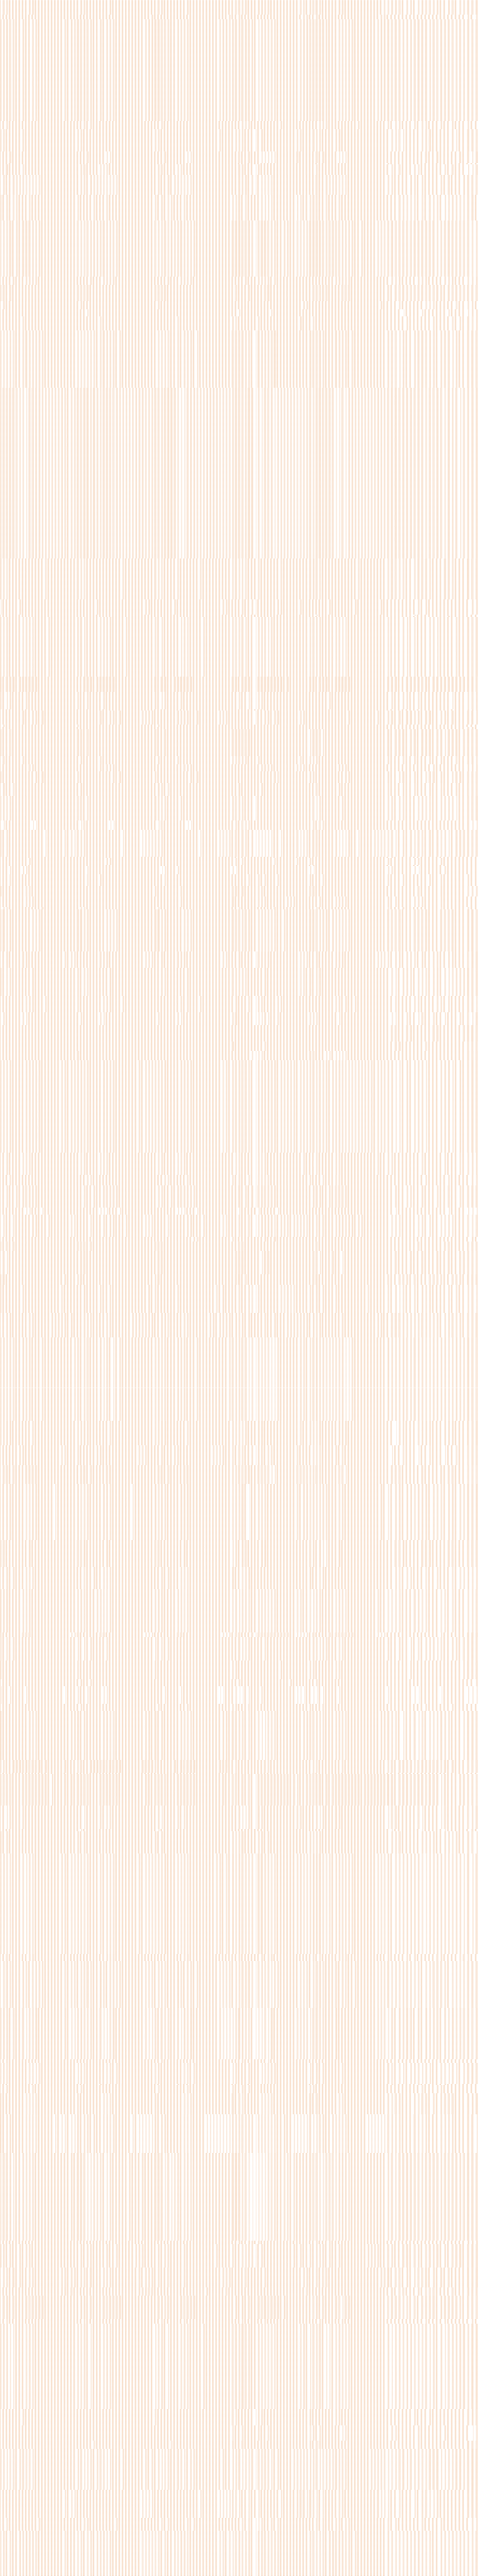



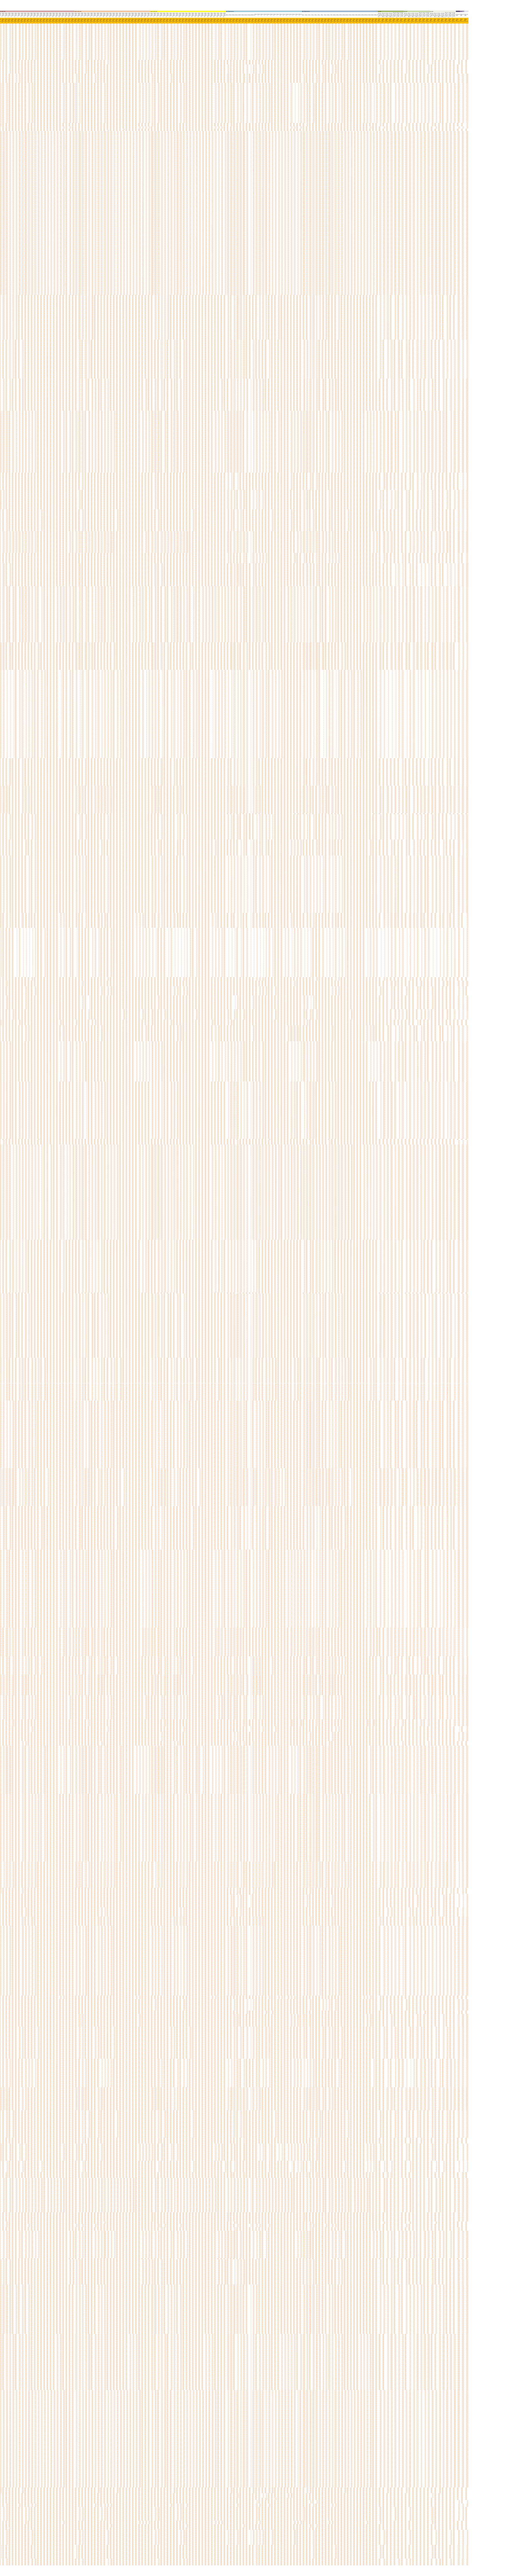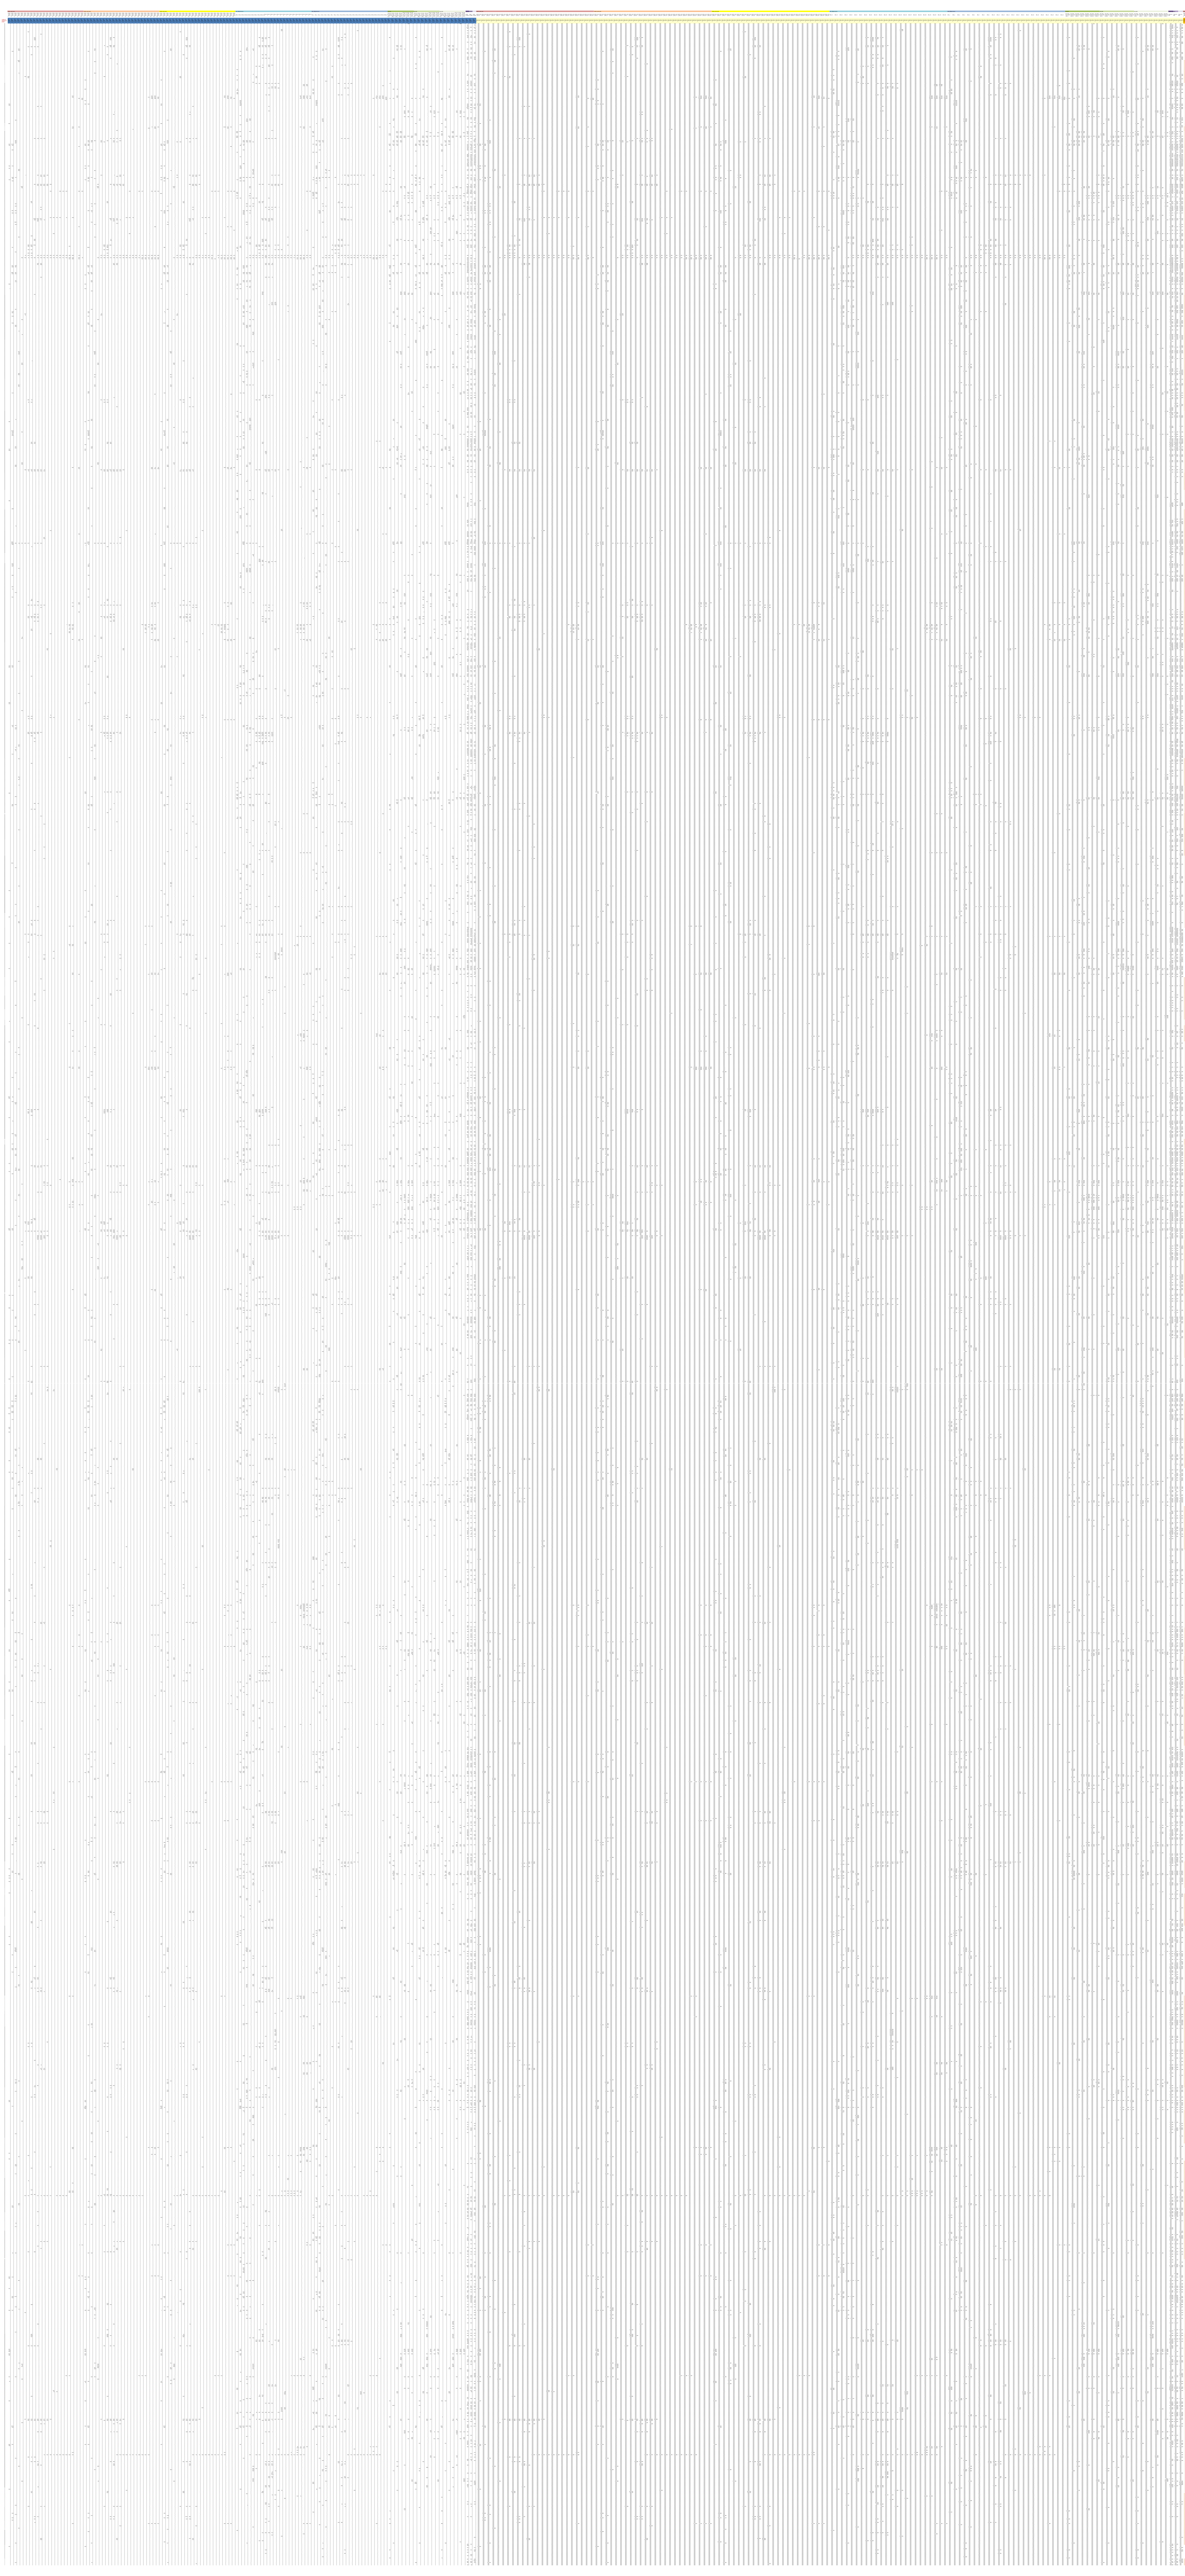



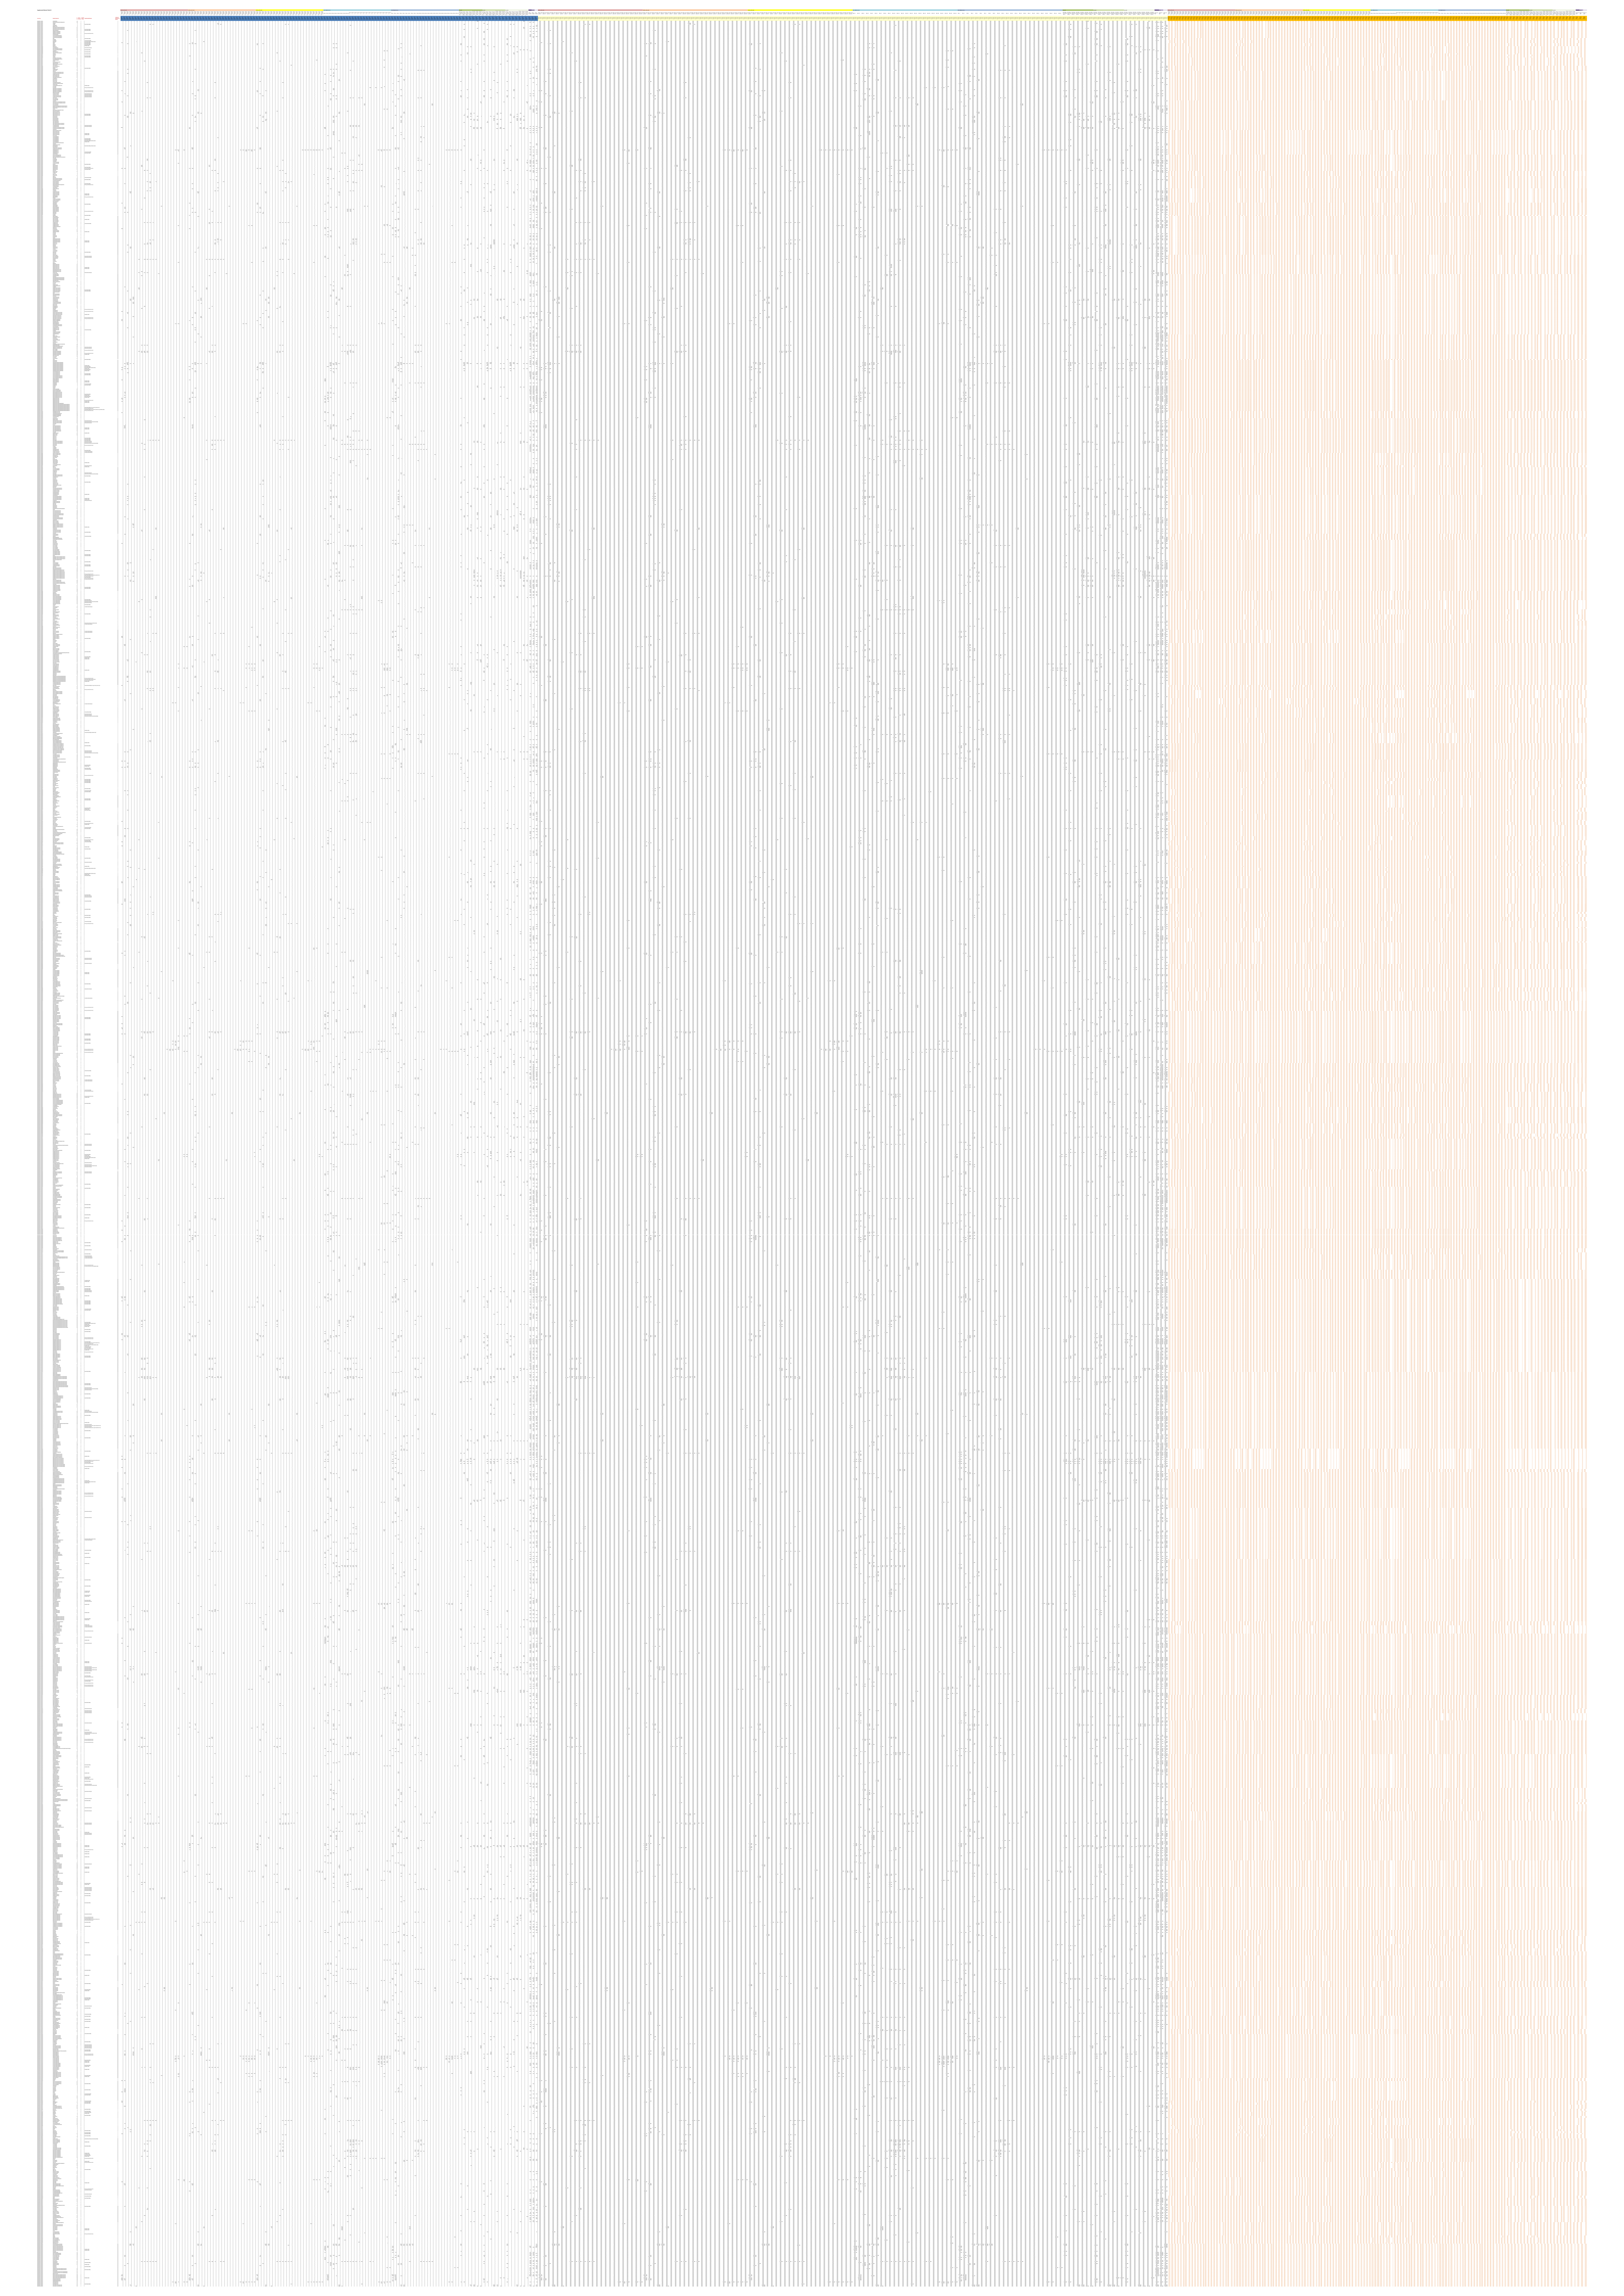



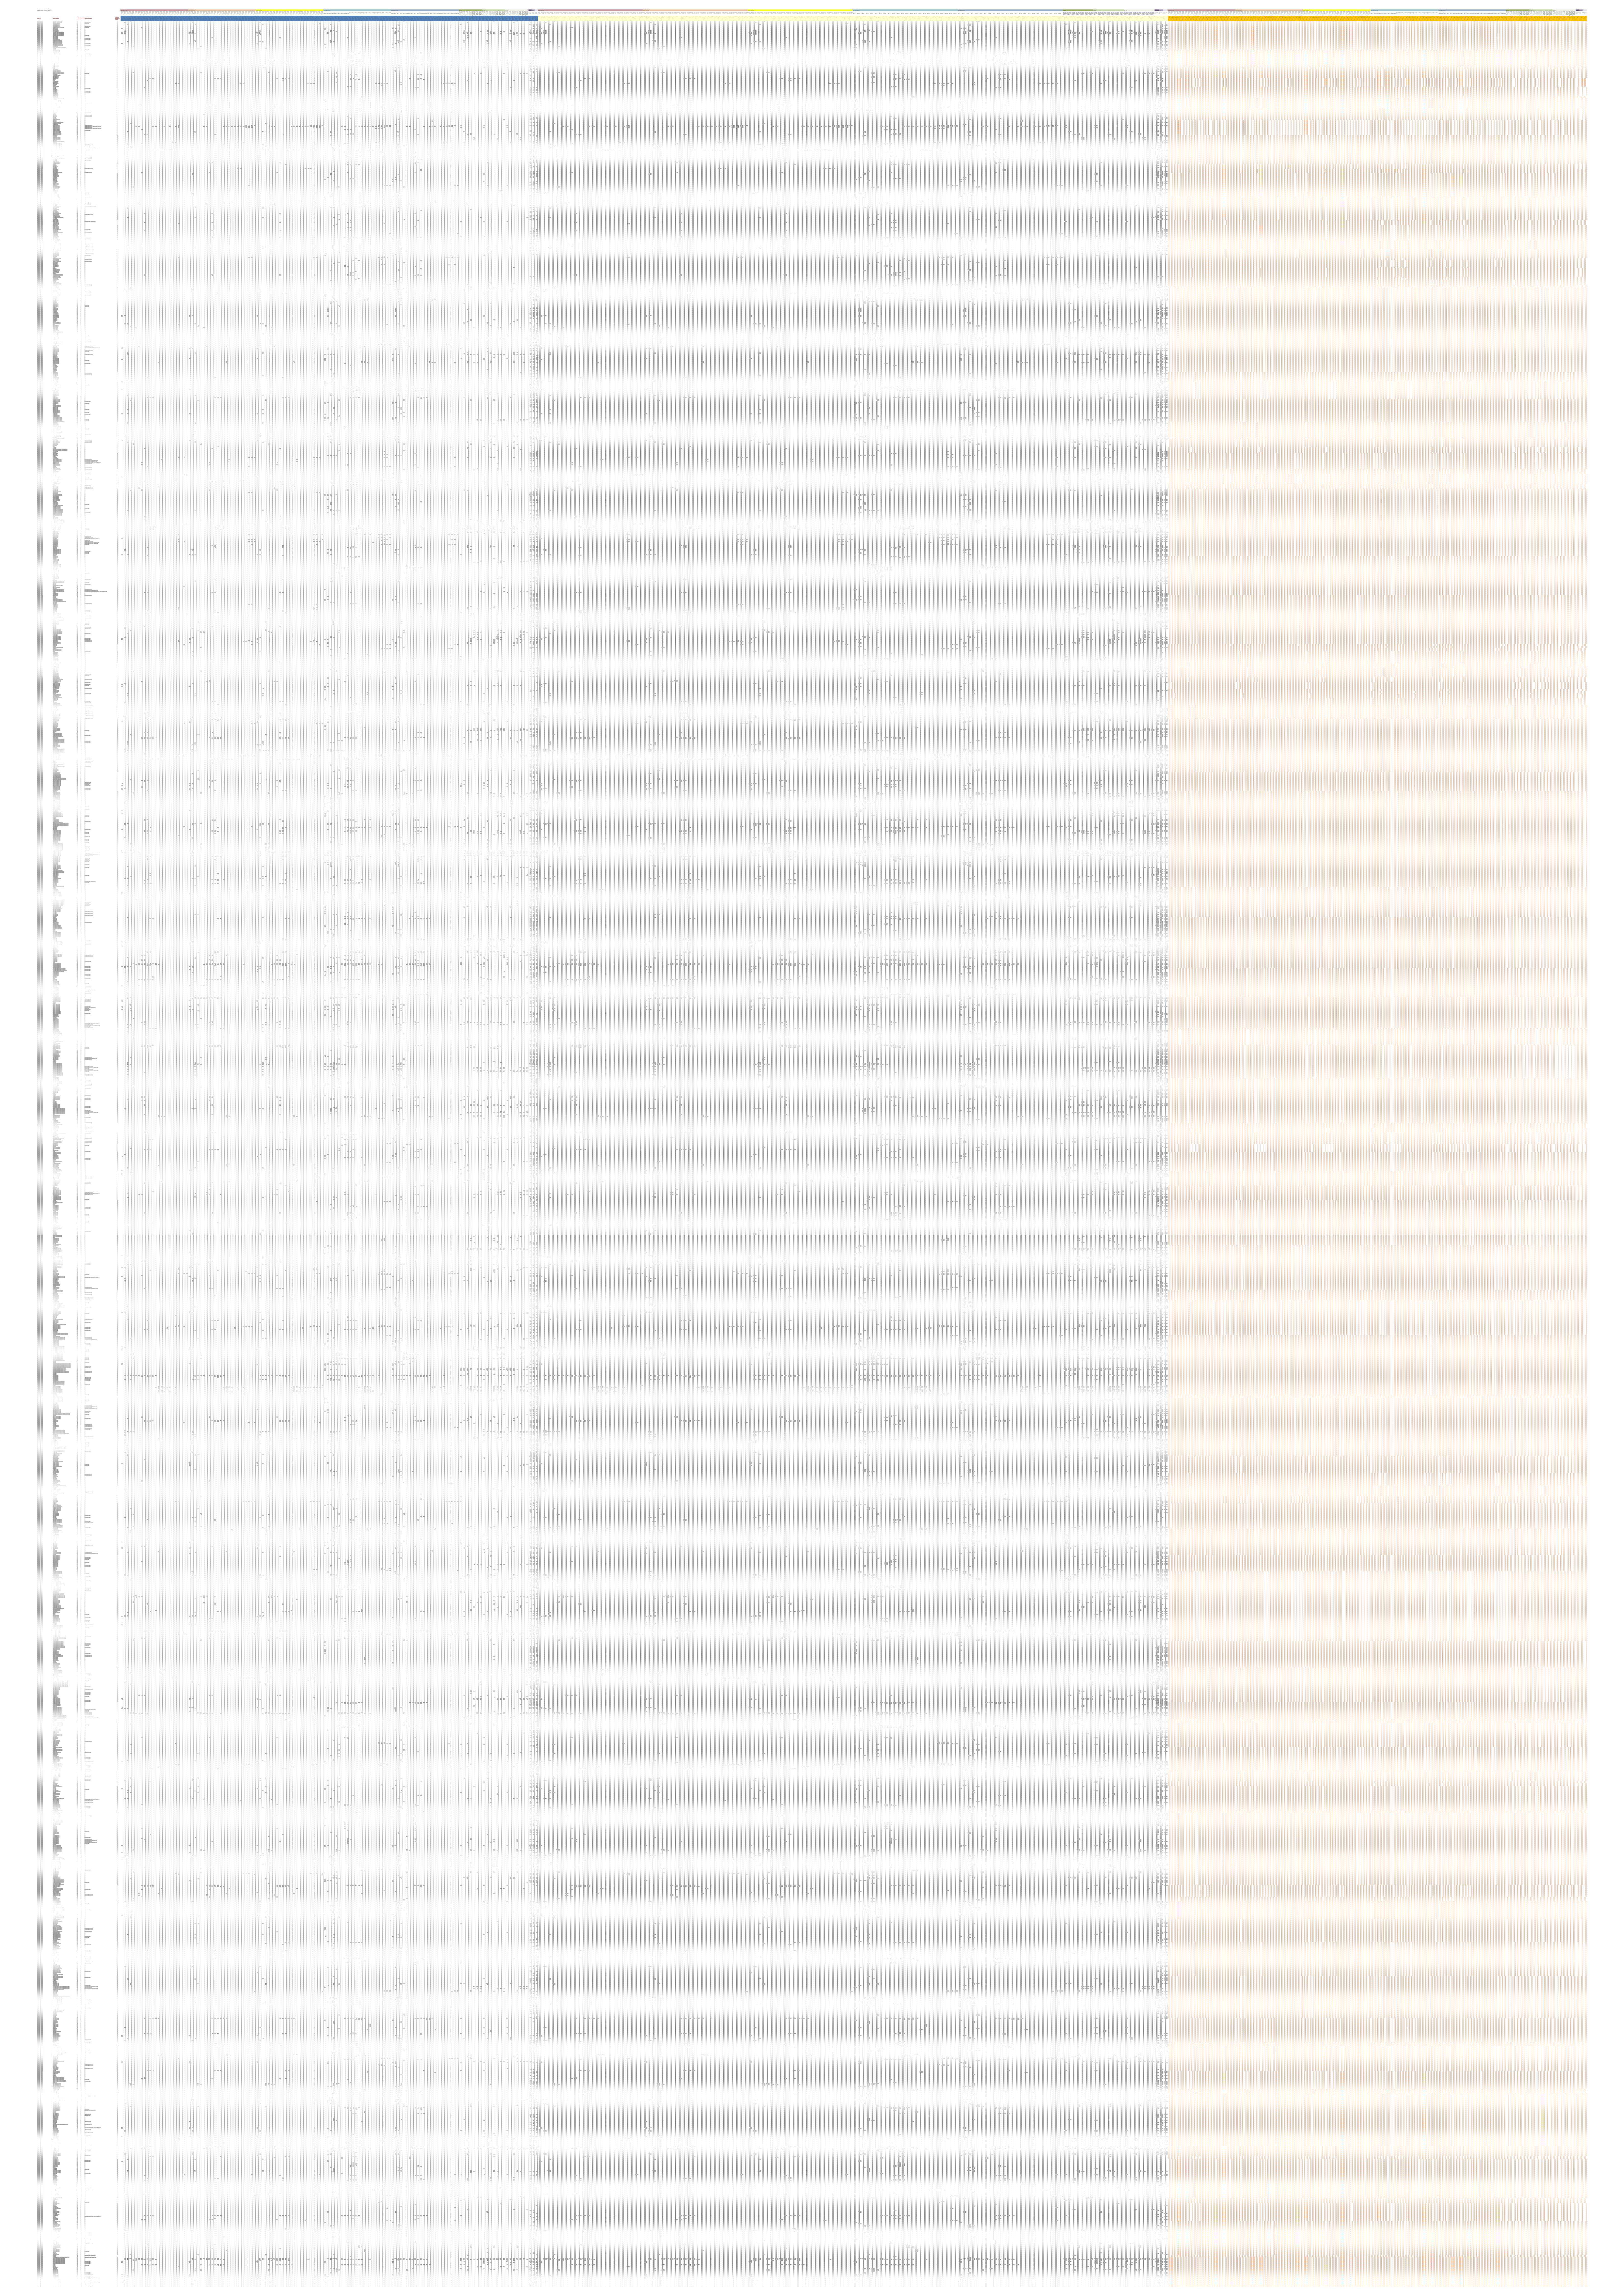



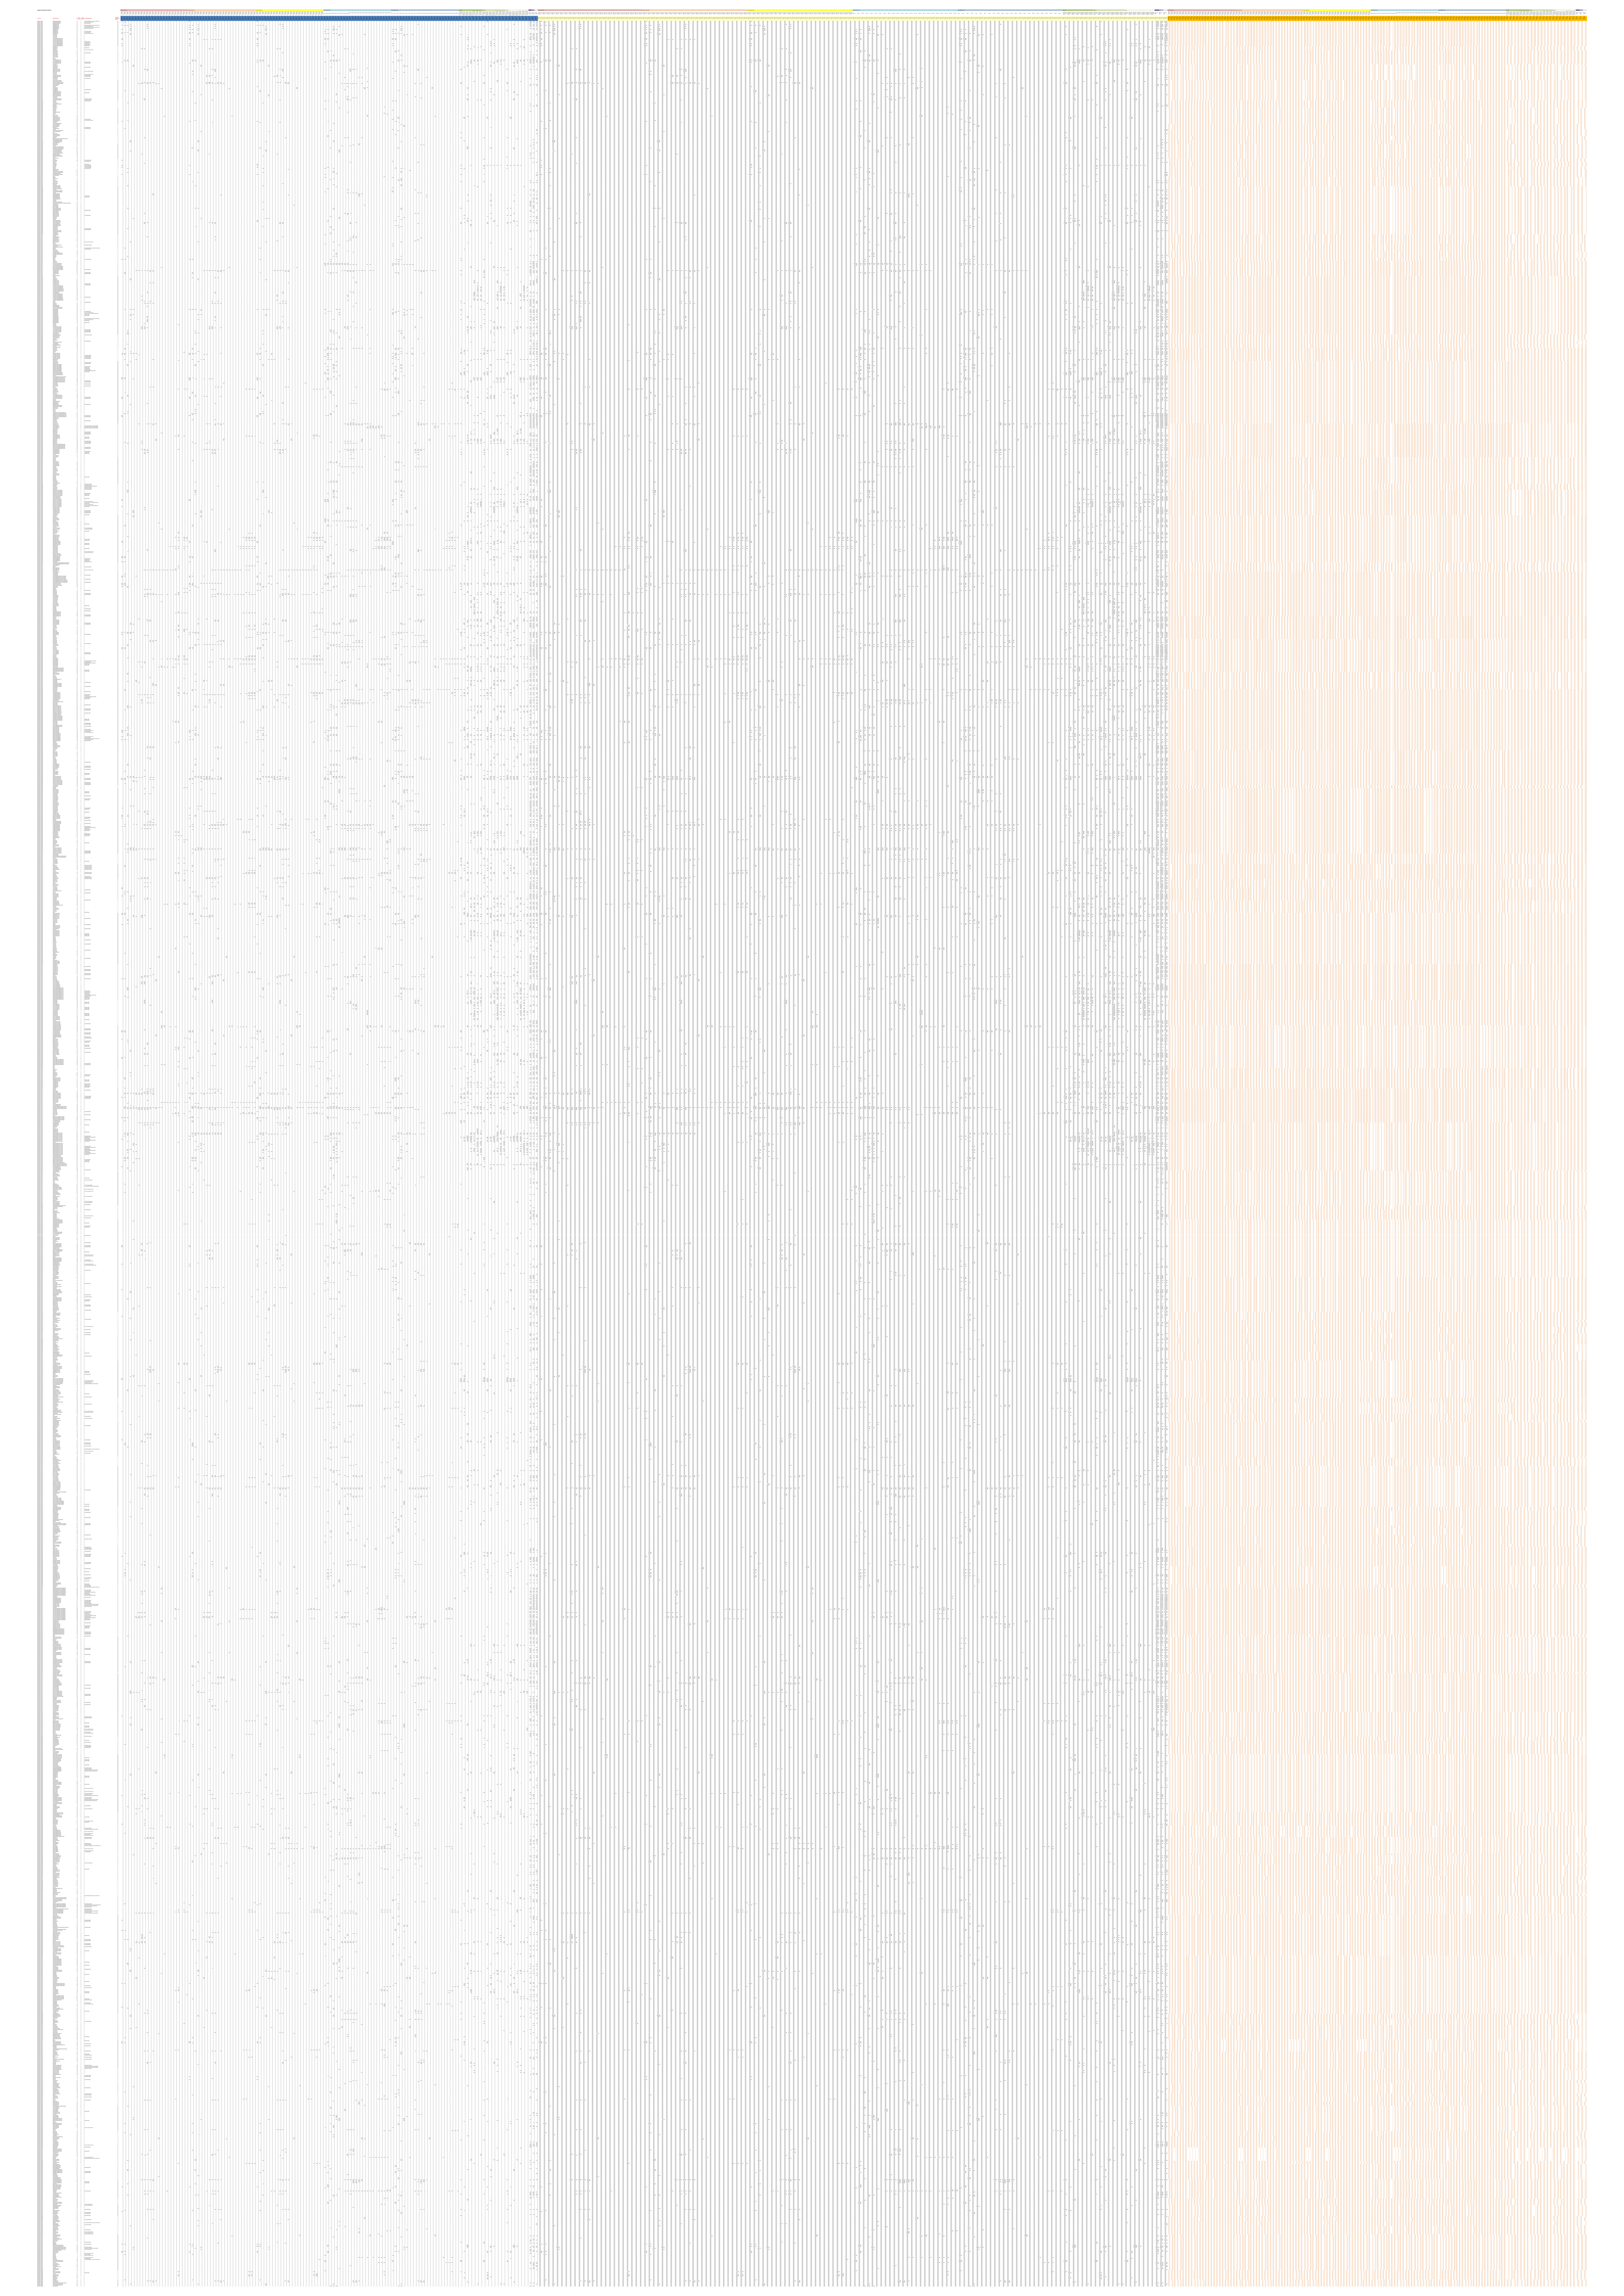



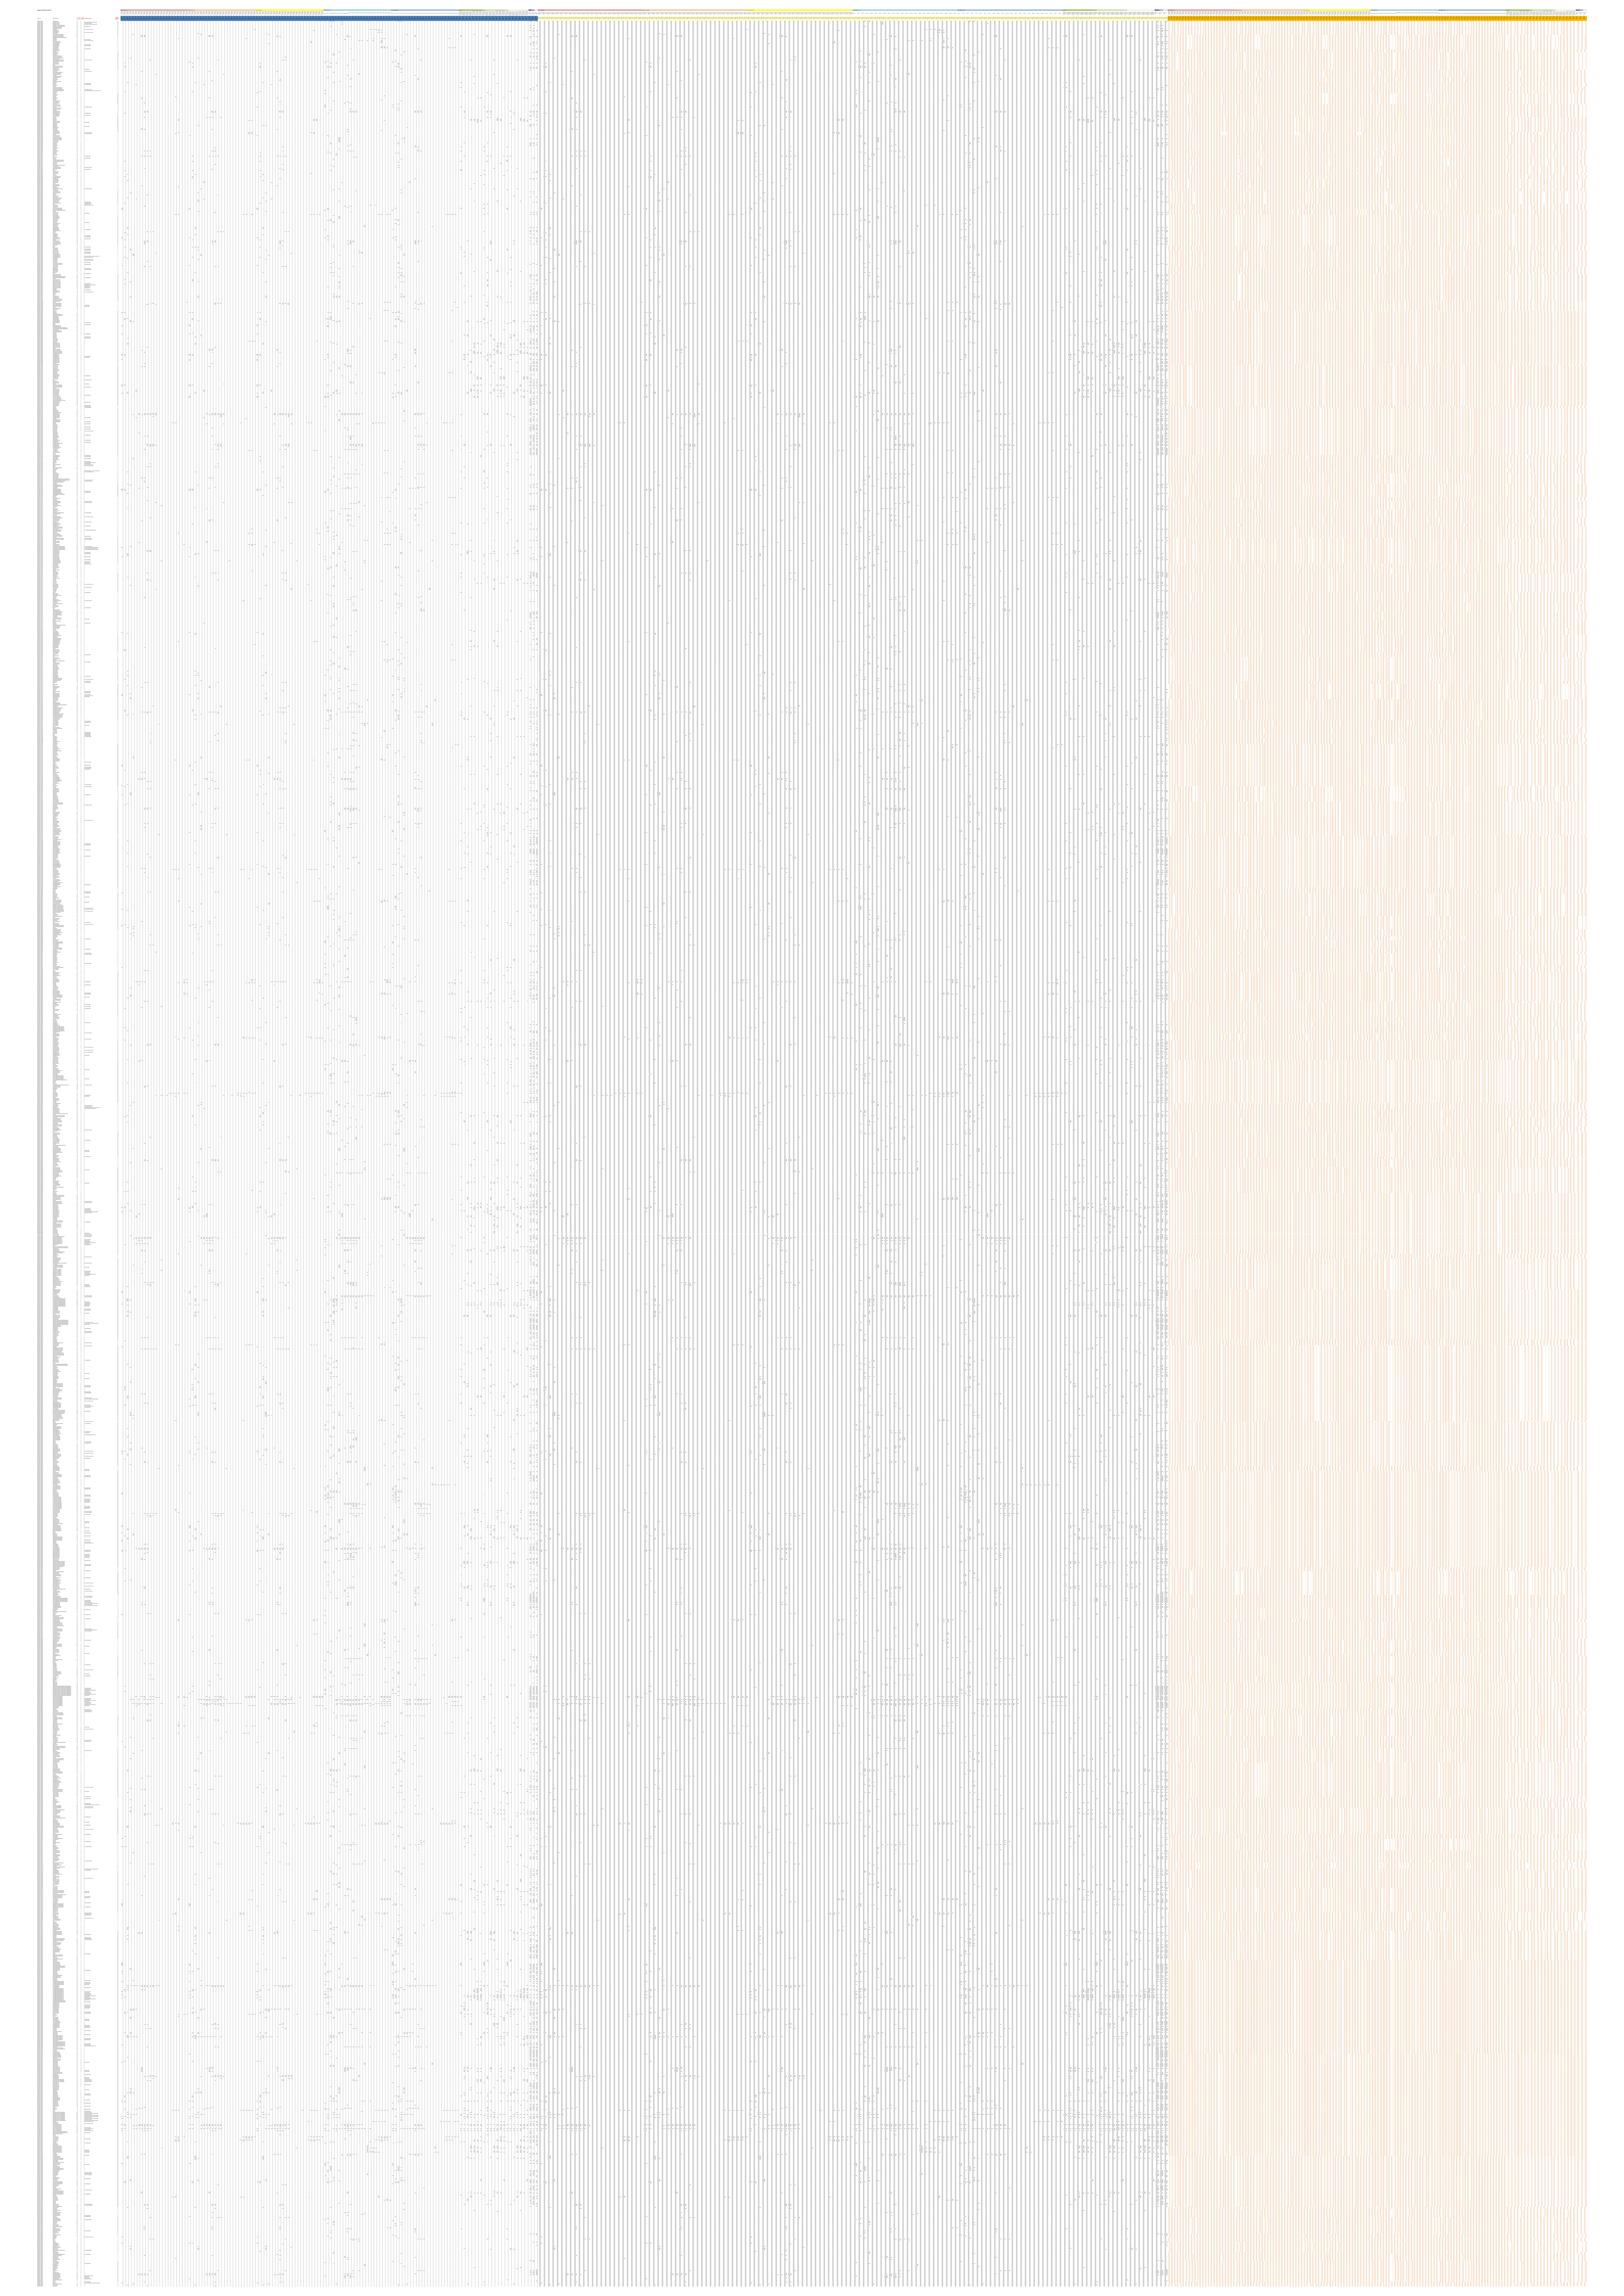



1. The first part of the document is a list of names and their corresponding addresses. The names are listed in the first column, and the addresses are listed in the second column. The names are: John Doe, Jane Smith, and Bob Johnson. The addresses are: 123 Main St, 456 Elm St, and 789 Oak St.

| Name        | Address     |
|-------------|-------------|
| John Doe    | 123 Main St |
| Jane Smith  | 456 Elm St  |
| Bob Johnson | 789 Oak St  |

| Name        | Address     |
|-------------|-------------|
| John Doe    | 123 Main St |
| Jane Smith  | 456 Elm St  |
| Bob Johnson | 789 Oak St  |
